# Supplementary material for: The ties that bind: Cradling in Tajikistan
Source: PLoS One. 2018 Oct 31;13(10):e0204428. doi: 10.1371/journal.pone.0204428 (PMC6209138; doi:10.1371/journal.pone.0204428)
Supplement: S3 File — (CSV) [file pone.0204428.s003.csv]

age group	id	total cradle hours	agemos	agemyr	caregiver	sex	placord	placsegs	placseq	placclothes	placleg	plactorso	placarm	placfeed	placrock	placfuss	placresist	placbottom	plactop	placopaq	segdur	condurmin	maxseq	plac	cath	sleg	bleg	stor	btor	blak	drap	brst	rocking	bott	clothes	armswad	armbound	armever	eyedrap	bodydrap	placdur	cathdur	slegdur	stordur	blegdur	btordur	blakdur	drapdur	brstdur
12	9		12.19592373	23	m	f	1	p	0	n	n	n	n	n	n	y	n	n	n	n	7.591	3.4843	8	1																	7.591
12	9		12.19592373	23	m	f	2	c	1	.	n	n	n	n	n	n	n	n	n	n	10.252	3.4843	8		1																	10.252
12	9		12.19592373	23	m	f	3	l	2	.	y	n	n	n	n	n	n	n	n	n	16.912	3.4843	8			1																	16.912
12	9		12.19592373	23	m	f	4	g	3	.	y	n	n	n	y	n	n	n	n	n	24.412	3.4843	8				1																		24.412
12	9		12.19592373	23	m	f	5	b	4	.	n	y	n	n	y	y	n	n	n	n	33.43	3.4843	8						1								0									33.43
12	9		12.19592373	23	m	f	6	k	5	.	n	n	n	n	n	n	n	n	n	n	8.226	3.4843	8							1																	8.226
12	9		12.19592373	23	m	f	7	d	6	.	n	n	n	n	n	n	n	y	n	n	4.993	3.4843	8								1								0	1								4.993
12	9		12.19592373	23	m	f	8	d	7	.	n	n	n	n	n	n	n	n	y	y	4.046	3.4843	8								1								1	0								4.046
12	9		12.19592373	23	m	f	9	r		.	n	n	n	n	y	y	n	n	n	n	17.17	3.4843	8										1
16	11	15	15.87771203	27	m	f	1	p	0	n	n	n	n	n	n	n	n	n	n	n	3.131	5.341316667	6	1																	3.131
16	11	15	15.87771203	27	m	f	2	c	1	.	n	n	n	n	n	n	n	n	n	n	4.574	5.341316667	6		1																	4.574
16	11	15	15.87771203	27	m	f	3	g	2	.	y	n	n	n	n	n	n	n	n	n	19.244	5.341316667	6				1																		19.244
16	11	15	15.87771203	27	m	f	4	b	3	.	n	y	y	n	n	n	n	n	n	n	23.679	5.341316667	6						1								1	1								23.679
16	11	15	15.87771203	27	m	f	5	k	4	.	n	n	n	n	n	n	n	n	n	n	11.521	5.341316667	6							1																	11.521
16	11	15	15.87771203	27	m	f	6	d	5	.	n	n	n	n	n	n	n	y	n	n	4.935	5.341316667	6								1								0	1								4.935
16	11	15	15.87771203	27	m	f	7	r		.	n	n	n	n	y	n	n	n	n	n	3.026	5.341316667	6										1
16	11	15	15.87771203	27	m	f	8	m		.	n	n	n	y	n	n	n	n	n	n	107.882	5.341316667	6									1																	107.882
12	13	6	11.83431953	25	m	m	1	p	0	y	n	n	n	n	n	y	n	n	n	n	2.729	13.16593333	6	1											1						2.729
12	13	6	11.83431953	25	m	m	2	c	1	.	n	n	n	n	n	y	n	n	n	n	9.01	13.16593333	6		1																	9.01
12	13	6	11.83431953	25	m	m	3	g	2	.	y	n	n	n	n	y	n	n	n	n	12.172	13.16593333	6				1																		12.172
12	13	6	11.83431953	25	m	m	4	b	3	.	n	y	y	n	n	n	n	n	n	n	12.605	13.16593333	6						1								1	1								12.605
12	13	6	11.83431953	25	m	m	5	d	4	.	n	n	n	n	n	n	n	y	n	n	4.146	13.16593333	6								1								0	1								4.146
12	13	6	11.83431953	25	m	m	6	r		.	n	n	n	n	y	y	n	n	n	n	9.894	13.16593333	6										1
12	13	6	11.83431953	25	m	m	7	m		.	n	n	n	y	n	n	n	n	n	n	341.885	13.16593333	6									1																	341.885
12	13	6	11.83431953	25	m	m	8	r		.	n	n	n	n	y	n	n	n	n	n	24.209	13.16593333	6										1
12	13	6	11.83431953	25	m	m	9	d	5	.	n	n	n	n	y	n	n	n	y	y	4.114	13.16593333	6								1								1	0								4.114
12	13	6	11.83431953	25	m	m	10	r		.	n	n	n	n	y	n	n	n	n	n	347.718	13.16593333	6										1
24	16		24.26035503	22	m	m	1	p	0	y	n	n	n	n	n	n	n	n	n	n	3.744	1.6694	6	1											1						3.744
24	16		24.26035503	22	m	m	2	c	1	.	n	n	n	n	n	n	n	n	n	n	4.945	1.6694	6		1																	4.945
24	16		24.26035503	22	m	m	3	l	2	.	y	n	n	n	n	y	n	n	n	n	4.287	1.6694	6			1																	4.287
24	16		24.26035503	22	m	m	4	g	3	.	y	n	n	n	n	n	n	n	n	n	16.267	1.6694	6				1																		16.267
24	16		24.26035503	22	m	m	5	b	4	.	n	y	y	n	n	y	n	n	n	n	14.85	1.6694	6						1								1	1								14.85
24	16		24.26035503	22	m	m	6	d	5	.	n	n	n	n	n	y	n	y	n	n	2.387	1.6694	6								1								0	1								2.387
24	16		24.26035503	22	m	m	7	r		.	n	n	n	n	y	y	n	n	n	n	3.502	1.6694	6										1
20	19		19.7896121	25	m	m	1	p	0	n	n	n	n	n	n	n	n	n	n	n	3.934	3.11625	5	1																	3.934
20	19		19.7896121	25	m	m	2	c	1	.	n	n	n	n	n	n	n	n	n	n	7.576	3.11625	5		1																	7.576
20	19		19.7896121	25	m	m	3	g	2	.	y	n	n	n	n	n	n	n	n	n	13.825	3.11625	5				1																		13.825
20	19		19.7896121	25	m	m	4	b	3	.	n	y	n	n	n	n	n	n	n	n	18.857	3.11625	5						1								0									18.857
20	19		19.7896121	25	m	m	5	d	4	.	n	n	n	n	y	n	n	y	n	n	24.174	3.11625	5								1								0	1								24.174
20	19		19.7896121	25	m	m	6	r		.	n	n	n	n	y	n	n	n	n	n	108.975	3.11625	5										1
8	21	16.25	7.922419461	24	g	m	1	p	0	n	n	n	n	n	n	n	n	n	n	n	2.846	16.43808333	6	1																	2.846
8	21	16.25	7.922419461	24	g	m	2	c	1	.	n	n	n	n	n	n	n	n	n	n	2.176	16.43808333	6		1																	2.176
8	21	16.25	7.922419461	24	g	m	3	g	2	.	y	n	n	n	n	n	n	n	n	n	18.428	16.43808333	6				1																		18.428
8	21	16.25	7.922419461	24	g	m	4	b	3	.	n	y	n	n	n	n	n	n	n	n	23.698	16.43808333	6						1								0									23.698
8	21	16.25	7.922419461	24	g	m	5	k	4	.	n	n	n	n	n	n	n	n	n	n	4.828	16.43808333	6							1																	4.828
8	21	16.25	7.922419461	24	g	m	6	d	5	.	n	n	n	n	n	n	n	y	n	n	4.269	16.43808333	6								1								0	1								4.269
8	21	16.25	7.922419461	24	g	m	7	r		.	n	n	n	n	y	n	n	n	n	n	8.636	16.43808333	6										1
8	21	16.25	7.922419461	24	g	m	8	m		.	n	n	n	y	n	n	n	n	n	n	183.022	16.43808333	6									1																	183.022
8	21	16.25	7.922419461	24	g	m	9	r		.	n	n	n	n	y	n	n	n	n	n	99.654	16.43808333	6										1
8	21	16.25	7.922419461	24	g	m	10	r		.	n	n	n	n	y	n	n	n	n	n	190.4	16.43808333	6										1
0	22	10	1.54503616	30	m	m	1	p	0	n	n	n	n	n	n	n	n	n	n	n	5.644	6.841366667	7	1																	5.644
0	22	10	1.54503616	30	m	m	2	c	1	.	n	n	n	n	n	n	n	n	n	n	3.298	6.841366667	7		1																	3.298
0	22	10	1.54503616	30	m	m	3	l	2	.	y	n	n	n	n	n	n	n	n	n	17.936	6.841366667	7			1																	17.936
0	22	10	1.54503616	30	m	m	4	g	3	.	y	n	n	n	n	n	n	n	n	n	22.474	6.841366667	7				1																		22.474
0	22	10	1.54503616	30	m	m	5	a	4	.	n	y	y	n	n	n	n	n	n	n	13.483	6.841366667	7					1								1		1						13.483
0	22	10	1.54503616	30	m	m	6	b	5	.	n	y	y	n	n	n	n	n	n	n	21.318	6.841366667	7						1								1	1								21.318
0	22	10	1.54503616	30	m	m	7	d	6	.	n	n	n	n	n	n	n	y	n	n	15.301	6.841366667	7								1								0	1								15.301
0	22	10	1.54503616	30	m	m	8	m		.	n	n	n	y	n	n	n	n	n	n	134.067	6.841366667	7									1																	134.067
0	22	10	1.54503616	30	m	m	9	r		.	n	n	n	n	y	n	n	n	n	n	48.954	6.841366667	7										1
4	26	19.25	3.977646285	19	g	m	1	p	0	n	n	n	n	n	n	n	n	n	n	n	3.91	28.28905	7	1																	3.91
4	26	19.25	3.977646285	19	g	m	2	c	1	.	n	n	n	n	n	n	n	n	n	n	7.297	28.28905	7		1																	7.297
4	26	19.25	3.977646285	19	g	m	3	l	2	.	y	n	n	n	n	n	n	n	n	n	10.636	28.28905	7			1																	10.636
4	26	19.25	3.977646285	19	g	m	4	g	3	.	y	n	n	n	n	n	n	n	n	n	33.966	28.28905	7				1																		33.966
4	26	19.25	3.977646285	19	g	m	5	b	4	.	n	y	y	n	n	n	n	n	n	n	24.833	28.28905	7						1								1	1								24.833
4	26	19.25	3.977646285	19	g	m	6	d	5	.	n	n	n	n	n	n	n	y	n	n	2.86	28.28905	7								1								0	1								2.86
4	26	19.25	3.977646285	19	g	m	7	r		.	n	n	n	n	y	n	n	n	n	n	17.85	28.28905	7										1
4	26	19.25	3.977646285	19	g	m	8	r		.	n	n	n	n	y	n	n	n	n	n	17.102	28.28905	7										1
4	26	19.25	3.977646285	19	g	m	9	d	6	.	n	n	n	n	n	n	n	n	y	y	4.005	28.28905	7								1								1	0								4.005
4	26	19.25	3.977646285	19	g	m	10	r		.	n	n	n	n	y	n	n	n	n	n	1027.991	28.28905	7										1
4	26	19.25	3.977646285	19	g	m	11	r		.	n	n	n	n	y	n	n	n	n	n	437.886	28.28905	7										1
0	27	8.5	1.380670611	22	g	f	1	p	0	y	n	n	n	n	n	n	n	n	n	n	4.691	6.4361	8	1											1						4.691
0	27	8.5	1.380670611	22	g	f	2	c	1	.	n	n	n	n	n	n	n	n	n	n	5.984	6.4361	8		1																	5.984
0	27	8.5	1.380670611	22	g	f	3	l	2	.	y	n	n	n	n	n	n	n	n	n	6.386	6.4361	8			1																	6.386
0	27	8.5	1.380670611	22	g	f	4	g	3	.	y	n	n	n	n	n	n	n	n	n	20.468	6.4361	8				1																		20.468
0	27	8.5	1.380670611	22	g	f	5	a	4	.	n	y	n	n	n	n	n	n	n	n	12.75	6.4361	8					1								0								12.75
0	27	8.5	1.380670611	22	g	f	6	b	5	.	n	y	y	n	n	n	n	n	n	n	24.242	6.4361	8						1								1	1								24.242
0	27	8.5	1.380670611	22	g	f	7	r		.	n	n	n	n	y	n	n	n	n	n	15.946	6.4361	8										1
0	27	8.5	1.380670611	22	g	f	8	k	6	.	n	n	n	n	n	n	n	n	n	n	10.234	6.4361	8							1																	10.234
0	27	8.5	1.380670611	22	g	f	9	d	7	.	n	n	n	n	n	n	n	y	n	n	4.93	6.4361	8								1								0	1								4.93
0	27	8.5	1.380670611	22	g	f	10	r		.	n	n	n	n	y	n	n	n	n	n	42.908	6.4361	8										1
0	27	8.5	1.380670611	22	g	f	11	r		.	n	n	n	n	y	n	n	n	n	n	111.316	6.4361	8										1
0	27	8.5	1.380670611	22	g	f	12	r		.	n	n	n	n	y	n	n	n	n	n	16.558	6.4361	8										1
8	33		7.922419461	26	m	m	1	p	0	n	n	n	n	n	n	n	n	n	n	n	6.037	7.272716667	7	1																	6.037
8	33		7.922419461	26	m	m	2	c	1	.	n	n	n	n	n	n	n	n	n	n	4.352	7.272716667	7		1																	4.352
8	33		7.922419461	26	m	m	3	l	2	.	y	n	n	n	n	n	n	n	n	n	14.369	7.272716667	7			1																	14.369
8	33		7.922419461	26	m	m	4	g	3	.	y	n	n	n	n	n	n	n	n	n	34.187	7.272716667	7				1																		34.187
8	33		7.922419461	26	m	m	5	b	4	.	n	y	n	n	n	y	n	n	n	n	53.622	7.272716667	7						1								0									53.622
8	33		7.922419461	26	m	m	6	r		.	n	n	n	n	y	n	n	n	n	n	7.376	7.272716667	7										1
8	33		7.922419461	26	m	m	7	k	5	.	n	n	n	n	y	n	n	n	n	n	10.438	7.272716667	7							1																	10.438
8	33		7.922419461	26	m	m	8	d	6	.	n	n	n	n	y	n	n	y	y	y	19.485	7.272716667	7								1								1	1								19.485
8	33		7.922419461	26	m	m	9	m		.	n	n	n	y	n	n	n	n	n	n	156.36	7.272716667	7									1																	156.36
0	36	19.5	2.169625247	30	m	m	1	p	0	n	n	n	n	n	n	n	n	n	n	n	4.76	10.50306667	7	1																	4.76
0	36	19.5	2.169625247	30	m	m	2	c	1	.	n	n	n	n	n	n	n	n	n	n	4.998	10.50306667	7		1																	4.998
0	36	19.5	2.169625247	30	m	m	3	g	2	.	y	n	n	n	n	y	n	n	n	n	22.44	10.50306667	7				1																		22.44
0	36	19.5	2.169625247	30	m	m	4	b	3	.	n	y	y	n	n	n	n	n	n	n	25.502	10.50306667	7						1								1	1								25.502
0	36	19.5	2.169625247	30	m	m	5	k	4	.	n	n	n	n	n	y	n	n	n	n	19.142	10.50306667	7							1																	19.142
0	36	19.5	2.169625247	30	m	m	6	k	5	.	n	n	n	n	n	y	n	n	n	n	14.586	10.50306667	7							1																	14.586
0	36	19.5	2.169625247	30	m	m	7	d	6	.	n	n	n	n	n	n	n	y	y	y	6.291	10.50306667	7								1								1	1								6.291
0	36	19.5	2.169625247	30	m	m	8	m		.	n	n	n	y	n	n	n	n	n	n	366.945	10.50306667	7									1																	366.945
0	36	19.5	2.169625247	30	m	m	9	r		.	n	n	n	n	y	n	n	n	n	n	57.322	10.50306667	7										1
4	37		3.977646285	18	m	f	1	p	0	n	n	n	n	n	n	n	n	n	n	n	4.43	4.150816667	7	1																	4.43
4	37		3.977646285	18	m	f	2	c	1	.	n	n	n	n	n	n	n	n	n	n	6.199	4.150816667	7		1																	6.199
4	37		3.977646285	18	m	f	3	l	2	.	y	n	n	n	n	n	n	n	n	n	8.308	4.150816667	7			1																	8.308
4	37		3.977646285	18	m	f	4	g	3	.	y	n	n	n	n	n	n	n	n	n	16.616	4.150816667	7				1																		16.616
4	37		3.977646285	18	m	f	5	b	4	.	n	y	n	n	n	y	y	n	n	n	30.631	4.150816667	7						1								0									30.631
4	37		3.977646285	18	m	f	6	k	5	.	n	n	n	n	y	y	y	n	n	n	10.166	4.150816667	7							1																	10.166
4	37		3.977646285	18	m	f	7	d	6	.	n	n	n	n	n	y	n	y	n	n	5.262	4.150816667	7								1								0	1								5.262
4	37		3.977646285	18	m	f	8	r		.	n	n	n	n	y	y	n	n	n	n	5.406	4.150816667	7										1
4	37		3.977646285	18	m	f	9	m		.	n	n	n	y	n	n	n	n	n	n	74.178	4.150816667	7									1																	74.178
4	37		3.977646285	18	m	f	10	r		.	n	n	n	n	y	y	n	n	n	n	30.641	4.150816667	7										1
12	38		12.13017751	23	m	m	1	p	0	n	.	.	.	.	.	.	.	.	.	.		12.31658333	5	1
12	38		12.13017751	23	m	m	2	c	1	.	n	n	n	n	n	y	n	n	n	n	8.942	12.31658333	5		1																	8.942
12	38		12.13017751	23	m	m	3	g	2	.	y	n	n	n	n	n	n	n	n	n	15.028	12.31658333	5				1																		15.028
12	38		12.13017751	23	m	m	4	b	3	.	n	y	n	n	y	n	n	n	n	n	10.676	12.31658333	5						1								0									10.676
12	38		12.13017751	23	m	m	5	d	4	.	n	n	n	n	n	n	n	y	n	n	2.686	12.31658333	5								1								0	1								2.686
12	38		12.13017751	23	m	m	6	m		.	n	n	n	y	n	y	n	n	n	n	17.431	12.31658333	5									1																	17.431
12	38		12.13017751	23	m	m	7	r		.	n	n	n	n	y	n	n	n	n	n	627.956	12.31658333	5										1
8	40		8.08678501	23	m	m	1	p	0	n	n	n	n	n	n	n	n	n	n	n	2.304	9.623566667	7	1																	2.304
8	40		8.08678501	23	m	m	2	c	1	.	n	n	n	n	n	n	n	n	n	n	2.244	9.623566667	7		1																	2.244
8	40		8.08678501	23	m	m	3	g	2	.	y	n	n	n	n	n	n	n	n	n	13.6	9.623566667	7				1																		13.6
8	40		8.08678501	23	m	m	4	b	3	.	n	y	y	n	n	n	n	n	n	n	15.028	9.623566667	7						1								1	1								15.028
8	40		8.08678501	23	m	m	5	k	4	.	n	n	n	n	n	n	n	n	n	n	21.624	9.623566667	7							1																	21.624
8	40		8.08678501	23	m	m	6	d	5	.	n	n	n	n	n	n	n	y	n	n	8.872	9.623566667	7								1								0	1								8.872
8	40		8.08678501	23	m	m	7	r		.	n	n	n	n	y	n	n	n	n	n	69.734	9.623566667	7										1
8	40		8.08678501	23	m	m	8	d	6	.	n	n	n	n	y	n	n	n	y	y	4.782	9.623566667	7								1								1	0								4.782
8	40		8.08678501	23	m	m	9	r		.	n	n	n	n	y	n	n	n	n	n	333.778	9.623566667	7										1
20	41	8.5	20.01972387	28	m	f	1	p	0	n	.	.	.	.	.	.	.	.	.	.		16.72816667	6	1
20	41	8.5	20.01972387	28	m	f	2	c	1	n	n	n	n	n	n	n	n	n	n	n	4.139	16.72816667	6		1																	4.139
20	41	8.5	20.01972387	28	m	f	3	g	2	n	y	n	n	n	n	n	n	n	n	n	19.101	16.72816667	6				1																		19.101
20	41	8.5	20.01972387	28	m	f	4	b	3	n	n	y	n	n	y	y	n	n	n	n	17.714	16.72816667	6						1								0									17.714
20	41	8.5	20.01972387	28	m	f	5	d	4	n	n	n	n	n	y	n	n	y	n	n	3.537	16.72816667	6								1								0	1								3.537
20	41	8.5	20.01972387	28	m	f	6	r		n	n	n	n	n	y	n	n	n	n	n	86.428	16.72816667	6										1
20	41	8.5	20.01972387	28	m	f	7	t		n	n	n	n	y	n	n	n	n	n	n	648.171	16.72816667	6											1
20	41	8.5	20.01972387	28	m	f	8	r		n	n	n	n	n	y	n	n	n	n	n	7.718	16.72816667	6										1
20	41	8.5	20.01972387	28	m	f	9	d	5	n	n	n	n	n	y	n	n	y	y	y	12.58	16.72816667	6								1								1	1								12.58
20	41	8.5	20.01972387	28	m	f	10	r		n	n	n	n	n	y	n	n	n	n	n	122.434	16.72816667	6										1
4	45	19	3.813280736	33	m	m	1	p	0	n	n	n	n	n	n	n	n	n	n	n	1.836	3.674833333	5	1																	1.836
4	45	19	3.813280736	33	m	m	2	c	1	.	n	n	n	n	n	n	n	n	n	n	7.913	3.674833333	5		1																	7.913
4	45	19	3.813280736	33	m	m	3	g	2	.	y	n	n	n	n	n	n	n	n	n	23.596	3.674833333	5				1																		23.596
4	45	19	3.813280736	33	m	m	4	b	3	.	n	y	y	n	n	n	n	n	n	n	24.725	3.674833333	5						1								1	1								24.725
4	45	19	3.813280736	33	m	m	5	d	4	.	n	n	n	n	n	n	n	y	n	n	28.424	3.674833333	5								1								0	1								28.424
0	46	21.25	0.493096647	22	m	m	1	p	0	n	n	n	n	n	n	n	n	n	n	n	5.973	2.90235	7	1																	5.973
0	46	21.25	0.493096647	22	m	m	2	c	1	.	n	n	n	n	n	n	n	n	n	n	3.164	2.90235	7		1																	3.164
0	46	21.25	0.493096647	22	m	m	3	g	2	.	y	n	n	n	n	n	n	n	n	n	30.26	2.90235	7				1																		30.26
0	46	21.25	0.493096647	22	m	m	4	b	3	.	n	y	y	n	n	n	n	n	n	n	34.136	2.90235	7						1								1	1								34.136
0	46	21.25	0.493096647	22	m	m	5	k	4	.	n	n	n	n	n	n	n	n	n	n	21.896	2.90235	7							1																	21.896
0	46	21.25	0.493096647	22	m	m	6	d	5	.	n	n	n	n	n	n	n	y	n	n	5.261	2.90235	7								1								0	1								5.261
0	46	21.25	0.493096647	22	m	m	7	d	6	.	n	n	n	n	n	n	n	n	y	y	4.711	2.90235	7								1								1	0								4.711
8	55		8.02103879	23	m	f	1	p	0	n	n	n	n	n	n	n	n	n	n	n	3.389	5.5221	8	1																	3.389
8	55		8.02103879	23	m	f	2	c	1	.	n	n	n	n	n	n	n	n	n	n	6.398	5.5221	8		1																	6.398
8	55		8.02103879	23	m	f	3	l	2	.	y	n	n	n	n	n	n	n	n	n	6.698	5.5221	8			1																	6.698
8	55		8.02103879	23	m	f	4	g	3	.	y	n	n	n	n	n	n	n	n	n	18.7	5.5221	8				1																		18.7
8	55		8.02103879	23	m	f	5	b	4	.	n	y	y	n	n	n	n	n	n	n	24.061	5.5221	8						1								1	1								24.061
8	55		8.02103879	23	m	f	6	k	5	.	n	n	n	n	n	n	n	n	n	n	5.134	5.5221	8							1																	5.134
8	55		8.02103879	23	m	f	7	d	6	.	n	n	n	n	y	n	n	y	n	n	1.972	5.5221	8								1								0	1								1.972
8	55		8.02103879	23	m	f	8	d	7	.	n	n	n	n	y	n	n	n	y	n	3.706	5.5221	8								1								0	0								3.706
8	55		8.02103879	23	m	f	9	r		.	n	n	n	n	y	n	n	n	n	n	12.24	5.5221	8										1
8	55		8.02103879	23	m	f	10	r		.	n	n	n	n	y	n	n	n	n	n	146.914	5.5221	8										1
16	60		15.84483892	23	m	f	1	p	0	n	n	n	n	n	n	n	n	n	n	n	6.228	5.658416667	7	1																	6.228
16	60		15.84483892	23	m	f	2	c	1	.	n	n	n	n	n	n	n	n	n	n	7.14	5.658416667	7		1																	7.14
16	60		15.84483892	23	m	f	3	l	2	.	y	n	n	n	n	n	n	n	n	n	6.12	5.658416667	7			1																	6.12
16	60		15.84483892	23	m	f	4	g	3	.	y	n	n	n	n	n	n	n	n	n	16.932	5.658416667	7				1																		16.932
16	60		15.84483892	23	m	f	5	a	4	.	n	y	y	n	n	n	n	n	n	n	4.386	5.658416667	7					1								1		1						4.386
16	60		15.84483892	23	m	f	6	b	5	.	n	y	y	n	n	n	n	n	n	n	15.164	5.658416667	7						1								1	1								15.164
16	60		15.84483892	23	m	f	7	d	6	.	n	n	n	n	y	n	n	y	n	n	16.014	5.658416667	7								1								0	1								16.014
16	60		15.84483892	23	m	f	8	r		.	n	n	n	n	y	n	n	n	n	n	209.202	5.658416667	7										1
4	61	14.75	4.043392505	24	m	m	1	p	0	n	n	n	n	n	n	n	n	n	n	n	5.282	3.719083333	8	1																	5.282
4	61	14.75	4.043392505	24	m	m	2	c	1	.	n	n	n	n	n	n	n	n	n	n	3.816	3.719083333	8		1																	3.816
4	61	14.75	4.043392505	24	m	m	3	l	2	.	y	n	n	n	n	n	n	n	n	n	5.475	3.719083333	8			1																	5.475
4	61	14.75	4.043392505	24	m	m	4	g	3	.	y	n	n	n	n	n	n	n	n	n	28.912	3.719083333	8				1																		28.912
4	61	14.75	4.043392505	24	m	m	5	a	4	.	n	y	y	n	n	n	n	n	n	n	8.962	3.719083333	8					1								1		1						8.962
4	61	14.75	4.043392505	24	m	m	6	b	5	.	n	y	y	n	n	n	n	n	n	n	15.127	3.719083333	8						1								1	1								15.127
4	61	14.75	4.043392505	24	m	m	7	d	6	.	n	n	n	n	n	n	n	y	n	n	11.58	3.719083333	8								1								0	1								11.58
4	61	14.75	4.043392505	24	m	m	8	d	7	.	n	n	n	n	y	n	n	y	y	y	10.71	3.719083333	8								1								1	1								10.71
4	61	14.75	4.043392505	24	m	m	9	r		.	n	n	n	n	y	n	n	n	n	n	32.062	3.719083333	8										1
4	63	14.5	3.977646285	21	m	m	1	p	0	n	n	n	n	n	n	n	n	n	n	n	5.076	3.991166667	8	1																	5.076
4	63	14.5	3.977646285	21	m	m	2	c	1	.	n	n	n	n	n	n	n	n	n	n	4.225	3.991166667	8		1																	4.225
4	63	14.5	3.977646285	21	m	m	3	l	2	.	y	n	n	n	n	n	n	n	n	n	13.138	3.991166667	8			1																	13.138
4	63	14.5	3.977646285	21	m	m	4	g	3	.	y	n	n	n	n	n	n	n	n	n	13.974	3.991166667	8				1																		13.974
4	63	14.5	3.977646285	21	m	m	5	a	4	.	n	y	y	n	n	n	n	n	n	n	9.401	3.991166667	8					1								1		1						9.401
4	63	14.5	3.977646285	21	m	m	6	b	5	.	n	y	y	n	n	n	n	n	n	n	19.448	3.991166667	8						1								1	1								19.448
4	63	14.5	3.977646285	21	m	m	7	k	6	.	n	n	n	n	n	n	n	n	n	n	7.587	3.991166667	8							1																	7.587
4	63	14.5	3.977646285	21	m	m	8	d	7	.	n	n	n	n	n	n	n	y	n	n	3.39	3.991166667	8								1								0	1								3.39
4	64	21.33333333	4.043392505	29	m	f	1	p	0	y	n	n	n	n	n	n	n	n	n	n	2.882	9.550466667	7	1											1						2.882
4	64	21.33333333	4.043392505	29	m	f	2	c	1	.	n	n	n	n	n	n	n	n	n	n	3.943	9.550466667	7		1																	3.943
4	64	21.33333333	4.043392505	29	m	f	3	l	2	.	y	n	n	n	n	n	n	n	n	n	8.159	9.550466667	7			1																	8.159
4	64	21.33333333	4.043392505	29	m	f	4	g	3	.	y	n	n	n	n	n	n	n	n	n	16.626	9.550466667	7				1																		16.626
4	64	21.33333333	4.043392505	29	m	f	5	b	4	.	n	y	y	n	n	n	n	n	n	n	24.106	9.550466667	7						1								1	1								24.106
4	64	21.33333333	4.043392505	29	m	f	6	d	5	.	n	n	n	n	n	n	n	y	n	n	5.474	9.550466667	7								1								0	1								5.474
4	64	21.33333333	4.043392505	29	m	f	7	d	6	.	n	n	n	n	n	n	n	n	y	y	1.326	9.550466667	7								1								1	0								1.326
4	64	21.33333333	4.043392505	29	m	f	8	m		.	n	n	n	y	n	n	n	n	n	n	233.859	9.550466667	7									1																	233.859
4	66	17.5	3.911900066	20	m	f	1	p	0	n	n	n	n	n	n	n	n	n	n	n	3.129	9.839966667	7	1																	3.129
4	66	17.5	3.911900066	20	m	f	2	c	1	.	n	n	n	n	n	n	n	n	n	n	7.907	9.839966667	7		1																	7.907
4	66	17.5	3.911900066	20	m	f	3	g	2	.	y	n	n	n	n	n	n	n	n	n	13.682	9.839966667	7				1																		13.682
4	66	17.5	3.911900066	20	m	f	4	b	3	.	n	y	y	n	n	n	n	n	n	n	16.898	9.839966667	7						1								1	1								16.898
4	66	17.5	3.911900066	20	m	f	5	k	4	.	n	n	n	n	n	n	n	n	n	n	9.995	9.839966667	7							1																	9.995
4	66	17.5	3.911900066	20	m	f	6	d	5	.	n	n	n	n	n	n	n	y	n	n	2.856	9.839966667	7								1								0	1								2.856
4	66	17.5	3.911900066	20	m	f	7	m		.	n	n	n	y	n	n	n	n	n	n	6.787	9.839966667	7									1																	6.787
4	66	17.5	3.911900066	20	m	f	8	d	6	.	n	n	n	n	y	n	n	n	y	y	5.032	9.839966667	7								1								1	0								5.032
4	66	17.5	3.911900066	20	m	f	9	r		.	n	n	n	n	y	n	n	n	n	n	35.156	9.839966667	7										1
4	66	17.5	3.911900066	20	m	f	10	r		.	n	n	n	n	y	n	n	n	n	n	129.336	9.839966667	7										1
4	66	17.5	3.911900066	20	m	f	11	r		.	n	n	n	n	y	n	n	n	n	n	6.884	9.839966667	7										1
4	66	17.5	3.911900066	20	m	f	12	r		.	n	n	n	n	y	n	n	n	n	n	156.788	9.839966667	7										1
4	66	17.5	3.911900066	20	m	f	13	r		.	n	n	n	n	y	n	n	n	n	n	58.843	9.839966667	7										1
12	68	15.75	12.03155819	21	m	f	1	p	0	n	n	n	n	n	n	y	n	n	n	n	3.591	6.478833333	6	1																	3.591
12	68	15.75	12.03155819	21	m	f	2	c	1	.	n	n	n	n	n	n	n	n	n	n	5.168	6.478833333	6		1																	5.168
12	68	15.75	12.03155819	21	m	f	3	g	2	.	y	n	n	n	n	y	n	n	n	n	14.586	6.478833333	6				1																		14.586
12	68	15.75	12.03155819	21	m	f	4	b	3	.	n	y	n	n	n	y	n	n	n	n	13.43	6.478833333	6						1								0									13.43
12	68	15.75	12.03155819	21	m	f	5	k	4	.	n	n	n	n	n	y	n	n	n	n	12.714	6.478833333	6							1																	12.714
12	68	15.75	12.03155819	21	m	f	6	d	5	.	n	n	n	n	n	n	n	y	n	n	5.678	6.478833333	6								1								0	1								5.678
12	68	15.75	12.03155819	21	m	f	7	r		.	n	n	n	n	y	y	n	n	n	n	9.875	6.478833333	6										1
12	68	15.75	12.03155819	21	m	f	8	m		.	n	n	n	y	n	y	n	n	n	n	233.305	6.478833333	6									1																	233.305
16	70	0.5	15.81196581	26	m	m	1	p	0	n	.	.	.	.	.	.	.	.	.	.		12.1108	9	1
16	70	0.5	15.81196581	26	m	m	2	c	1	.	n	n	n	n	n	y	n	n	n	n	2.958	12.1108	9		1																	2.958
16	70	0.5	15.81196581	26	m	m	3	l	2	.	y	n	n	n	n	y	n	n	n	n	9.486	12.1108	9			1																	9.486
16	70	0.5	15.81196581	26	m	m	4	g	3	.	y	n	n	n	n	y	n	n	n	n	12.92	12.1108	9				1																		12.92
16	70	0.5	15.81196581	26	m	m	5	b	4	.	n	y	y	n	n	n	n	n	n	n	19.04	12.1108	9						1								1	1								19.04
16	70	0.5	15.81196581	26	m	m	6	k	5	.	n	n	n	n	n	n	n	n	n	n	15.334	12.1108	9							1																	15.334
16	70	0.5	15.81196581	26	m	m	7	d	6	.	n	n	n	n	n	n	n	y	n	n	6.562	12.1108	9								1								0	1								6.562
16	70	0.5	15.81196581	26	m	m	8	r		.	n	n	n	n	y	n	n	n	n	n	14.212	12.1108	9										1
16	70	0.5	15.81196581	26	m	m	9	d	7	.	n	n	n	n	y	n	n	n	y	n	5.168	12.1108	9								1								0	0								5.168
16	70	0.5	15.81196581	26	m	m	10	r		.	n	n	n	n	y	n	n	n	n	n	122.876	12.1108	9										1
16	70	0.5	15.81196581	26	m	m	11	r		.	n	n	n	n	y	n	n	n	n	n	49.786	12.1108	9										1
16	70	0.5	15.81196581	26	m	m	12	d	8	.	n	n	n	n	n	n	n	y	n	n	3.706	12.1108	9								1								0	1								3.706
16	70	0.5	15.81196581	26	m	m	13	r		.	n	n	n	n	y	n	n	n	n	n	5.032	12.1108	9										1
16	70	0.5	15.81196581	26	m	m	14	m		.	n	n	n	y	n	n	n	n	n	n	71.328	12.1108	9									1																	71.328
16	70	0.5	15.81196581	26	m	m	15	r		.	n	n	n	n	y	n	n	n	n	n	326.468	12.1108	9										1
16	70	0.5	15.81196581	26	m	m	16	r		.	n	n	n	n	y	n	n	n	n	n	7.48	12.1108	9										1
24	71	8.25	24.06311637	25	m	f	1	p	0	n	n	n	n	n	n	n	n	n	n	n	8.895	8.457966667	9	1																	8.895
24	71	8.25	24.06311637	25	m	f	2	c	1	.	n	n	n	n	n	n	n	n	n	n	3.64	8.457966667	9		1																	3.64
24	71	8.25	24.06311637	25	m	f	3	l	2	.	y	n	n	n	n	n	n	n	n	n	12.685	8.457966667	9			1																	12.685
24	71	8.25	24.06311637	25	m	f	4	g	3	.	y	n	n	n	n	n	n	n	n	n	26.371	8.457966667	9				1																		26.371
24	71	8.25	24.06311637	25	m	f	5	k	4	.	n	n	n	n	n	n	n	n	n	n	15.093	8.457966667	9							1																	15.093
24	71	8.25	24.06311637	25	m	f	6	b	5	.	n	y	n	n	n	n	n	n	n	n	19.093	8.457966667	9						1								0									19.093
24	71	8.25	24.06311637	25	m	f	7	d	6	.	n	n	n	n	y	n	n	y	n	n	11.053	8.457966667	9								1								0	1								11.053
24	71	8.25	24.06311637	25	m	f	8	d	7	.	n	n	n	n	y	n	n	n	y	n	4.892	8.457966667	9								1								0	0								4.892
24	71	8.25	24.06311637	25	m	f	9	r		.	n	n	n	n	y	n	n	n	n	n	322.796	8.457966667	9										1
24	71	8.25	24.06311637	25	m	f	10	d	8	.	n	n	n	n	y	n	n	y	n	n	4.59	8.457966667	9								1								0	1								4.59
24	71	8.25	24.06311637	25	m	f	11	r		.	n	n	n	n	y	n	n	n	n	n	39.916	8.457966667	9										1
12	73		12.03155819	22	m	m	1	p	0	y	n	n	n	n	n	y	n	n	n	n	3.532	13.17008333	7	1											1						3.532
12	73		12.03155819	22	m	m	2	c	1	.	n	n	n	n	n	y	n	n	n	n	7.65	13.17008333	7		1																	7.65
12	73		12.03155819	22	m	m	3	l	2	.	n	n	n	n	n	n	n	n	n	n	6.406	13.17008333	7			1																	6.406
12	73		12.03155819	22	m	m	4	g	3	.	y	n	n	n	n	n	n	n	n	n	16.27	13.17008333	7				1																		16.27
12	73		12.03155819	22	m	m	5	b	4	.	n	y	n	n	n	n	n	n	n	n	20.072	13.17008333	7						1								0									20.072
12	73		12.03155819	22	m	m	6	k	5	.	n	n	n	n	n	y	n	n	n	n	9.336	13.17008333	7							1																	9.336
12	73		12.03155819	22	m	m	7	d	6	.	n	n	n	n	n	n	n	y	n	n	5.202	13.17008333	7								1								0	1								5.202
12	73		12.03155819	22	m	m	8	m		.	n	n	n	y	n	n	n	n	n	n	265.765	13.17008333	7									1																	265.765
12	73		12.03155819	22	m	m	9	r		.	n	n	n	n	y	n	n	n	n	n	4.454	13.17008333	7										1
12	73		12.03155819	22	m	m	10	m		.	n	n	n	y	n	n	n	n	n	n	185.194	13.17008333	7									1																	185.194
12	73		12.03155819	22	m	m	11	r		.	n	n	n	n	y	y	n	n	n	n	52.511	13.17008333	7										1
12	73		12.03155819	22	m	m	12	m		.	n	n	n	y	n	n	n	n	n	n	183.924	13.17008333	7									1																	183.924
20	74	13.75	19.88823143	27	m	f	1	p	0	n	n	n	n	n	n	y	n	n	n	n	5.047	8.812333333	9	1																	5.047
20	74	13.75	19.88823143	27	m	f	2	c	1	.	n	n	n	n	n	y	y	n	n	n	9.92	8.812333333	9		1																	9.92
20	74	13.75	19.88823143	27	m	f	3	g	2	.	y	n	n	n	n	y	n	n	n	n	19.7	8.812333333	9				1																		19.7
20	74	13.75	19.88823143	27	m	f	4	b	3	.	n	y	n	n	n	y	n	n	n	n	22.467	8.812333333	9						1								0									22.467
20	74	13.75	19.88823143	27	m	f	5	k	4	.	n	n	n	n	n	y	n	n	n	n	9.842	8.812333333	9							1																	9.842
20	74	13.75	19.88823143	27	m	f	6	d	5	.	n	n	n	n	n	y	n	y	n	n	6.978	8.812333333	9								1								0	1								6.978
20	74	13.75	19.88823143	27	m	f	7	d	6	.	n	n	n	n	n	y	n	n	y	y	5.484	8.812333333	9								1								1	0								5.484
20	74	13.75	19.88823143	27	m	f	8	d	7	.	n	n	n	n	n	n	n	y	n	n	11.074	8.812333333	9								1								0	1								11.074
20	74	13.75	19.88823143	27	m	f	9	r		.	n	n	n	n	y	n	n	n	n	n	30.124	8.812333333	9										1
20	74	13.75	19.88823143	27	m	f	10	r		.	n	n	n	n	y	n	n	n	n	n	4.08	8.812333333	9										1
20	74	13.75	19.88823143	27	m	f	11	r		.	n	n	n	n	y	n	n	n	n	n	1.938	8.812333333	9										1
20	74	13.75	19.88823143	27	m	f	12	r		.	n	n	n	n	y	n	n	n	n	n	1.514	8.812333333	9										1
20	74	13.75	19.88823143	27	m	f	13	r		.	n	n	n	n	y	y	n	n	n	n	2.955	8.812333333	9										1
20	74	13.75	19.88823143	27	m	f	14	t		.	n	n	n	y	n	n	n	n	n	n	91.712	8.812333333	9											1
20	74	13.75	19.88823143	27	m	f	15	r		.	n	n	n	n	y	n	n	n	n	n	93.416	8.812333333	9										1
20	74	13.75	19.88823143	27	m	f	16	d	8	.	n	n	n	n	y	n	n	y	n	n	2.992	8.812333333	9								1								0	1								2.992
20	74	13.75	19.88823143	27	m	f	17	r		.	n	n	n	n	y	n	n	n	n	n	59.605	8.812333333	9										1
20	76	16	19.82248521	24	g	f	1	p	0	y	n	n	n	n	n	y	n	n	n	n	2.57	4.6284	8	1											1						2.57
20	76	16	19.82248521	24	g	f	2	c	1	.	n	n	n	n	n	y	y	n	n	n	3.985	4.6284	8		1																	3.985
20	76	16	19.82248521	24	g	f	3	l	2	.	y	n	n	n	n	y	y	n	n	n	5.636	4.6284	8			1																	5.636
20	76	16	19.82248521	24	g	f	4	g	3	.	y	n	n	n	n	y	y	n	n	n	13.073	4.6284	8				1																		13.073
20	76	16	19.82248521	24	g	f	5	b	4	.	n	y	y	n	n	y	y	n	n	n	22.159	4.6284	8						1								1	1								22.159
20	76	16	19.82248521	24	g	f	6	k	5	.	n	n	n	n	n	y	n	n	n	n	15.683	4.6284	8							1																	15.683
20	76	16	19.82248521	24	g	f	7	d	6	.	n	n	n	n	n	y	n	y	n	n	10.271	4.6284	8								1								0	1								10.271
20	76	16	19.82248521	24	g	f	8	d	7	.	n	n	n	n	n	y	n	y	n	n	6.157	4.6284	8								1								0	1								6.157
20	76	16	19.82248521	24	g	f	9	m		.	n	n	n	y	n	y	n	n	n	n	155.588	4.6284	8									1																	155.588
20	76	16	19.82248521	24	g	f	10	r		.	n	n	n	n	y	y	n	n	n	n	25.364	4.6284	8										1
12	77	5	11.90006575	42	m	f	1	p	0	n	n	n	n	n	n	n	n	n	n	n	2.135	15.40401667	6	1																	2.135
12	77	5	11.90006575	42	m	f	2	c	1	.	n	n	n	n	n	n	n	n	n	n	3.722	15.40401667	6		1																	3.722
12	77	5	11.90006575	42	m	f	3	g	2	.	y	n	n	n	n	n	n	n	n	n	22.677	15.40401667	6				1																		22.677
12	77	5	11.90006575	42	m	f	4	b	3	.	n	y	n	n	n	n	n	n	n	n	20.795	15.40401667	6						1								0									20.795
12	77	5	11.90006575	42	m	f	5	k	4	.	n	n	n	n	n	n	n	n	n	n	12.524	15.40401667	6							1																	12.524
12	77	5	11.90006575	42	m	f	6	d	5	.	n	n	n	n	n	n	n	y	n	n	20.281	15.40401667	6								1								0	1								20.281
12	77	5	11.90006575	42	m	f	7	m		.	n	n	n	y	n	n	n	n	n	n	372.198	15.40401667	6									1																	372.198
12	77	5	11.90006575	42	m	f	8	r		.	n	n	n	n	y	n	n	n	n	n	37.203	15.40401667	6										1
12	77	5	11.90006575	42	m	f	9	m		.	n	n	n	y	n	n	n	n	n	n	52.944	15.40401667	6									1																	52.944
12	77	5	11.90006575	42	m	f	10	r		.	n	n	n	n	y	n	n	n	n	n	22.848	15.40401667	6										1
12	77	5	11.90006575	42	m	f	11	r		.	n	n	n	n	y	n	n	n	n	n	227.12	15.40401667	6										1
12	77	5	11.90006575	42	m	f	12	r		.	n	n	n	n	y	n	n	n	n	n	66.507	15.40401667	6										1
16	78	13.25	16.27218935	23	m	f	1	p	0	y	n	n	n	n	n	n	n	n	n	n	5.738	13.0665	10	1											1						5.738
16	78	13.25	16.27218935	23	m	f	2	c	1	.	n	n	n	n	n	n	n	n	n	n	2.618	13.0665	10		1																	2.618
16	78	13.25	16.27218935	23	m	f	3	l	2	.	y	n	n	n	n	n	n	n	n	n	2.414	13.0665	10			1																	2.414
16	78	13.25	16.27218935	23	m	f	4	l	3	.	y	n	n	n	n	n	n	n	n	n	3.502	13.0665	10			1																	3.502
16	78	13.25	16.27218935	23	m	f	5	g	4	.	y	n	n	n	n	n	n	n	n	n	16.422	13.0665	10				1																		16.422
16	78	13.25	16.27218935	23	m	f	6	b	5	.	n	y	n	n	n	n	n	n	n	n	20.57	13.0665	10						1								0									20.57
16	78	13.25	16.27218935	23	m	f	7	k	6	.	n	n	n	n	n	n	n	n	n	n	13.528	13.0665	10							1																	13.528
16	78	13.25	16.27218935	23	m	f	8	d	7	.	n	n	n	n	n	n	n	y	n	n	8.295	13.0665	10								1								0	1								8.295
16	78	13.25	16.27218935	23	m	f	9	d	8	.	n	n	n	n	y	n	n	n	y	n	7.276	13.0665	10								1								0	0								7.276
16	78	13.25	16.27218935	23	m	f	10	d	9	.	n	n	n	n	n	n	n	y	n	n	1.632	13.0665	10								1								0	1								1.632
16	78	13.25	16.27218935	23	m	f	11	m		.	n	n	n	y	n	n	n	n	n	n	543.385	13.0665	10									1																	543.385
16	78	13.25	16.27218935	23	m	f	12	r		.	n	n	n	n	y	n	n	n	n	n	59.874	13.0665	10										1
16	81	3.833333333	16.04207758	32	m	m	1	p	0	n	n	n	n	n	n	y	n	n	n	n	5.733	12.38385	8	1																	5.733
16	81	3.833333333	16.04207758	32	m	m	2	c	1	.	n	n	n	n	n	y	n	n	n	n	4.726	12.38385	8		1																	4.726
16	81	3.833333333	16.04207758	32	m	m	3	l	2	.	y	n	n	n	n	y	n	n	n	n	5.746	12.38385	8			1																	5.746
16	81	3.833333333	16.04207758	32	m	m	4	g	3	.	y	n	n	n	n	y	n	n	n	n	13.294	12.38385	8				1																		13.294
16	81	3.833333333	16.04207758	32	m	m	5	k	4	.	n	n	n	n	n	y	n	n	n	n	13.474	12.38385	8							1																	13.474
16	81	3.833333333	16.04207758	32	m	m	6	b	5	.	n	y	y	n	n	y	n	n	n	n	19.278	12.38385	8						1								1	1								19.278
16	81	3.833333333	16.04207758	32	m	m	7	d	6	.	n	n	n	n	n	y	n	y	n	n	3.801	12.38385	8								1								0	1								3.801
16	81	3.833333333	16.04207758	32	m	m	8	d	7	.	n	n	n	n	n	y	n	n	y	y	6.641	12.38385	8								1								1	0								6.641
16	81	3.833333333	16.04207758	32	m	m	9	m		.	n	n	n	y	n	n	n	n	n	n	595.884	12.38385	8									1																	595.884
16	81	3.833333333	16.04207758	32	m	m	10	r		.	n	n	n	n	y	y	n	n	n	n	5.309	12.38385	8										1
20	84	13.25	19.92110454	24	m	m	1	p	0	y	n	n	n	n	n	n	n	n	n	n	6.293	13.5029	7	1											1						6.293
20	84	13.25	19.92110454	24	m	m	2	c	1	.	n	n	n	n	n	n	n	n	n	n	9.062	13.5029	7		1																	9.062
20	84	13.25	19.92110454	24	m	m	3	g	2	.	y	n	n	n	n	n	n	n	n	n	23.086	13.5029	7				1																		23.086
20	84	13.25	19.92110454	24	m	m	4	b	3	.	n	y	y	n	n	n	n	n	n	n	22.882	13.5029	7						1								1	1								22.882
20	84	13.25	19.92110454	24	m	m	5	k	4	.	n	n	n	n	n	n	n	n	n	n	22.372	13.5029	7							1																	22.372
20	84	13.25	19.92110454	24	m	m	6	d	5	.	n	n	n	n	n	y	n	y	y	y	17.306	13.5029	7								1								1	1								17.306
20	84	13.25	19.92110454	24	m	m	7	m		.	n	n	n	y	n	n	n	n	n	n	439.611	13.5029	7									1																	439.611
20	84	13.25	19.92110454	24	m	m	8	r		.	n	n	n	n	y	n	n	n	n	n	14.178	13.5029	7										1
20	84	13.25	19.92110454	24	m	m	9	d	6	.	n	n	n	n	n	n	n	y	n	n	9.35	13.5029	7								1								0	1								9.35
20	84	13.25	19.92110454	24	m	m	10	r		.	n	n	n	n	y	n	n	n	n	n	98.566	13.5029	7										1
12	89	14.08333333	12.13017751	21	m	f	1	p	0	y	n	n	n	n	n	n	n	n	n	n	2.291	1.944033333	6	1											1						2.291
12	89	14.08333333	12.13017751	21	m	f	2	c	1	.	n	n	n	n	n	n	n	n	n	n	2.312	1.944033333	6		1																	2.312
12	89	14.08333333	12.13017751	21	m	f	3	g	2	.	y	n	n	n	n	y	n	n	n	n	19.775	1.944033333	6				1																		19.775
12	89	14.08333333	12.13017751	21	m	f	4	b	3	.	n	y	y	n	y	y	n	n	n	n	25.568	1.944033333	6						1								1	1								25.568
12	89	14.08333333	12.13017751	21	m	f	5	k	4	.	n	n	n	n	n	y	n	n	n	n	6.188	1.944033333	6							1																	6.188
12	89	14.08333333	12.13017751	21	m	f	6	d	5	.	n	n	n	n	n	y	n	y	n	n	7.278	1.944033333	6								1								0	1								7.278
12	89	14.08333333	12.13017751	21	m	f	7	r		.	n	n	n	n	y	y	n	n	n	n	10.098	1.944033333	6										1
20	90	11	20.18408941	36	m	m	1	p	0	n	n	n	n	n	n	n	n	n	n	n	3.313	37.47378333	7	1																	3.313
20	90	11	20.18408941	36	m	m	2	c	1	.	n	n	n	n	n	n	n	n	n	n	4.896	37.47378333	7		1																	4.896
20	90	11	20.18408941	36	m	m	3	l	2	.	y	n	n	n	n	n	n	n	n	n	9.094	37.47378333	7			1																	9.094
20	90	11	20.18408941	36	m	m	4	g	3	.	y	n	n	n	n	n	n	n	n	n	19.448	37.47378333	7				1																		19.448
20	90	11	20.18408941	36	m	m	5	b	4	.	n	y	n	n	n	y	n	n	n	n	29.784	37.47378333	7						1								0									29.784
20	90	11	20.18408941	36	m	m	6	k	5	.	n	n	n	n	n	y	n	n	n	n	13.702	37.47378333	7							1																	13.702
20	90	11	20.18408941	36	m	m	7	d	6	.	n	n	n	n	n	y	n	y	n	n	6.46	37.47378333	7								1								0	1								6.46
20	90	11	20.18408941	36	m	m	8	m		.	n	n	n	y	n	n	n	n	n	n	1524.21	37.47378333	7									1																	1524.21
20	90	11	20.18408941	36	m	m	9	m		.	n	n	n	y	n	n	n	n	n	n	13.33	37.47378333	7									1																	13.33
20	90	11	20.18408941	36	m	m	10	m		.	n	n	n	y	n	n	n	n	n	n	230.639	37.47378333	7									1																	230.639
20	90	11	20.18408941	36	m	m	11	r		.	n	n	n	n	y	n	n	n	n	n	15.254	37.47378333	7										1
8	92	16	8.0539119		m	f	1	p	0	y	n	n	n	n	n	y	n	n	n	n	3.719	8.5374	9	1											1						3.719
8	92	16	8.0539119		m	f	2	c	1	.	n	n	n	n	n	y	n	n	n	n	2.264	8.5374	9		1																	2.264
8	92	16	8.0539119		m	f	3	l	2	.	y	n	n	n	n	n	n	n	n	n	2.575	8.5374	9			1																	2.575
8	92	16	8.0539119		m	f	4	g	3	.	y	n	n	n	n	n	n	n	n	n	13.677	8.5374	9				1																		13.677
8	92	16	8.0539119		m	f	5	a	4	.	n	y	y	n	n	y	n	n	n	n	27.377	8.5374	9					1								1		1						27.377
8	92	16	8.0539119		m	f	6	b	5	.	n	y	y	n	n	n	n	n	n	n	12.475	8.5374	9						1								1	1								12.475
8	92	16	8.0539119		m	f	7	k	6	.	n	n	n	n	n	n	n	n	n	n	10.819	8.5374	9							1																	10.819
8	92	16	8.0539119		m	f	8	d	7	.	n	n	n	n	n	y	n	y	n	n	5.125	8.5374	9								1								0	1								5.125
8	92	16	8.0539119		m	f	9	d	8	.	n	n	n	n	n	n	n	n	y	y	5.95	8.5374	9								1								1	0								5.95
20	93	12	20.01972387	28	m	m	1	p	0	y	n	n	n	n	n	n	n	n	n	n	2.099	7.4647	9	1											1						2.099
20	93	12	20.01972387	28	m	m	2	c	1	.	n	n	n	n	n	n	n	n	n	n	1.292	7.4647	9		1																	1.292
20	93	12	20.01972387	28	m	m	3	l	2	.	y	n	n	n	n	n	n	n	n	n	5.337	7.4647	9			1																	5.337
20	93	12	20.01972387	28	m	m	4	g	3	.	y	n	n	n	n	n	n	n	n	n	14.96	7.4647	9				1																		14.96
20	93	12	20.01972387	28	m	m	5	a	4	.	n	y	y	n	n	n	n	n	n	n	6.018	7.4647	9					1								1		1						6.018
20	93	12	20.01972387	28	m	m	6	b	5	.	n	y	y	n	n	n	n	n	n	n	16.217	7.4647	9						1								1	1								16.217
20	93	12	20.01972387	28	m	m	7	k	6	.	n	n	n	n	n	n	n	n	n	n	5.105	7.4647	9							1																	5.105
20	93	12	20.01972387	28	m	m	8	d	7	.	n	n	n	n	n	n	n	y	n	n	10.719	7.4647	9								1								0	1								10.719
20	93	12	20.01972387	28	m	m	9	m		.	n	n	n	y	n	n	n	n	n	n	37.351	7.4647	9									1																	37.351
20	93	12	20.01972387	28	m	m	10	d	8	.	n	n	n	y	n	n	n	n	y	y	6.097	7.4647	9								1								1	0								6.097
4	94	18.33333333	4.109138725	20	m	m	1	p	0	n	n	n	n	n	n	n	n	n	n	n	4.206	15.04051667	7	1																	4.206
4	94	18.33333333	4.109138725	20	m	m	2	c	1	.	n	n	n	n	n	n	n	n	n	n	5.474	15.04051667	7		1																	5.474
4	94	18.33333333	4.109138725	20	m	m	3	l	2	.	y	n	n	n	n	n	n	n	n	n	11.271	15.04051667	7			1																	11.271
4	94	18.33333333	4.109138725	20	m	m	4	g	3	.	y	n	n	n	n	n	n	n	n	n	25.066	15.04051667	7				1																		25.066
4	94	18.33333333	4.109138725	20	m	m	5	b	4	.	n	y	y	n	n	n	n	n	n	n	17.288	15.04051667	7						1								1	1								17.288
4	94	18.33333333	4.109138725	20	m	m	6	k	5	.	n	n	n	n	n	n	n	n	n	n	10.404	15.04051667	7							1																	10.404
4	94	18.33333333	4.109138725	20	m	m	7	d	6	.	n	n	n	n	n	n	n	y	n	n	7.471	15.04051667	7								1								0	1								7.471
4	94	18.33333333	4.109138725	20	m	m	8	r		.	n	n	n	n	y	n	n	n	n	n	99.62	15.04051667	7										1
4	94	18.33333333	4.109138725	20	m	m	9	r		.	n	n	n	n	y	n	n	n	n	n	16.946	15.04051667	7										1
4	94	18.33333333	4.109138725	20	m	m	10	t		.	n	n	n	y	n	n	n	n	n	n	157.516	15.04051667	7											1
4	94	18.33333333	4.109138725	20	m	m	11	r		.	n	n	n	n	y	n	n	n	n	n	321.208	15.04051667	7										1
8	95	17.25	8.152531229		m	m	1	p	0	n	n	n	n	n	n	n	n	n	n	n	4.854	6.594166667	6	1																	4.854
8	95	17.25	8.152531229		m	m	2	c	1	.	n	n	n	n	n	n	n	n	n	n	4.182	6.594166667	6		1																	4.182
8	95	17.25	8.152531229		m	m	3	g	2	.	y	n	n	n	n	n	n	n	n	n	33.082	6.594166667	6				1																		33.082
8	95	17.25	8.152531229		m	m	4	b	3	.	n	y	y	n	n	n	n	n	n	n	35.19	6.594166667	6						1								1	1								35.19
8	95	17.25	8.152531229		m	m	5	r		.	n	n	n	n	y	n	n	n	n	n	14.79	6.594166667	6										1
8	95	17.25	8.152531229		m	m	6	k	4	.	n	n	n	n	n	n	n	n	n	n	27.957	6.594166667	6							1																	27.957
8	95	17.25	8.152531229		m	m	7	d	5	.	n	n	n	n	n	n	n	y	n	n	7.421	6.594166667	6								1								0	1								7.421
8	95	17.25	8.152531229		m	m	8	r		.	n	n	n	n	y	n	n	n	n	n	9.826	6.594166667	6										1
8	95	17.25	8.152531229		m	m	9	m		.	n	n	n	y	n	n	n	n	n	n	94.318	6.594166667	6									1																	94.318
8	95	17.25	8.152531229		m	m	10	r		.	n	n	n	n	y	n	n	n	n	n	80.138	6.594166667	6										1
16	96	10	15.87771203	25	m	m	1	p	0	n	n	n	n	n	n	n	n	n	n	n	3.999	4.943383333	8	1																	3.999
16	96	10	15.87771203	25	m	m	2	c	1	.	n	n	n	n	n	n	n	n	n	n	5.95	4.943383333	8		1																	5.95
16	96	10	15.87771203	25	m	m	3	l	2	.	y	n	n	n	n	n	n	n	n	n	6.29	4.943383333	8			1																	6.29
16	96	10	15.87771203	25	m	m	4	l	3	.	y	n	n	n	n	n	n	n	n	n	5.338	4.943383333	8			1																	5.338
16	96	10	15.87771203	25	m	m	5	g	4	.	y	n	n	n	n	n	n	n	n	n	13.94	4.943383333	8				1																		13.94
16	96	10	15.87771203	25	m	m	6	a	5	.	n	y	y	n	n	n	n	n	n	n	10.472	4.943383333	8					1								1		1						10.472
16	96	10	15.87771203	25	m	m	7	b	6	.	n	y	y	n	y	y	n	n	n	n	38.08	4.943383333	8						1								1	1								38.08
16	96	10	15.87771203	25	m	m	8	d	7	.	n	n	n	n	y	n	n	y	n	n	9.962	4.943383333	8								1								0	1								9.962
16	96	10	15.87771203	25	m	m	9	r		.	n	n	n	n	y	n	n	n	n	n	5.236	4.943383333	8										1
16	96	10	15.87771203	25	m	m	10	m		.	n	n	n	y	y	n	n	n	n	n	47.26	4.943383333	8									1																	47.26
16	96	10	15.87771203	25	m	m	11	r		.	n	n	n	n	y	y	n	n	n	n	5.61	4.943383333	8										1
16	96	10	15.87771203	25	m	m	12	r		.	n	n	n	n	y	y	n	n	n	n	24.82	4.943383333	8										1
8	97	14.75	7.790927022	23	m	f	1	p	0	n	n	n	n	n	n	n	n	n	n	n	5.821	4.960566667	9	1																	5.821
8	97	14.75	7.790927022	23	m	f	2	c	1	.	n	n	n	n	n	n	n	n	n	n	5.44	4.960566667	9		1																	5.44
8	97	14.75	7.790927022	23	m	f	3	l	2	.	y	n	n	n	n	y	n	n	n	n	13.677	4.960566667	9			1																	13.677
8	97	14.75	7.790927022	23	m	f	4	g	3	.	y	n	n	n	n	y	n	n	n	n	21.844	4.960566667	9				1																		21.844
8	97	14.75	7.790927022	23	m	f	5	a	4	.	n	y	y	n	n	y	y	n	n	n	7.242	4.960566667	9					1								1		1						7.242
8	97	14.75	7.790927022	23	m	f	6	b	5	.	n	y	y	n	y	y	n	n	n	n	18.836	4.960566667	9						1								1	1								18.836
8	97	14.75	7.790927022	23	m	f	7	k	6	.	n	n	n	n	n	y	n	n	n	n	20.4	4.960566667	9							1																	20.4
8	97	14.75	7.790927022	23	m	f	8	d	7	.	n	n	n	n	y	n	n	y	n	n	3.337	4.960566667	9								1								0	1								3.337
8	97	14.75	7.790927022	23	m	f	9	r		.	n	n	n	n	y	n	n	n	n	n	26.676	4.960566667	9										1
8	97	14.75	7.790927022	23	m	f	10	d	8	.	n	n	n	n	y	n	n	n	y	y	5.612	4.960566667	9								1								1	0								5.612
8	97	14.75	7.790927022	23	m	f	11	r		.	n	n	n	n	y	n	n	n	n	n	8.126	4.960566667	9										1
8	98	15	8.218277449	28	m	m	1	p	0	y	n	n	n	n	n	n	n	n	n	n	4.305	2.388633333	6	1											1						4.305
8	98	15	8.218277449	28	m	m	2	c	1	.	n	n	n	n	n	n	n	n	n	n	3.749	2.388633333	6		1																	3.749
8	98	15	8.218277449	28	m	m	3	g	2	.	y	n	n	n	n	n	n	n	n	n	16.959	2.388633333	6				1																		16.959
8	98	15	8.218277449	28	m	m	4	b	3	.	n	y	y	n	n	n	n	n	n	n	18.638	2.388633333	6						1								1	1								18.638
8	98	15	8.218277449	28	m	m	5	k	4	.	n	n	n	n	n	n	n	n	n	n	10.702	2.388633333	6							1																	10.702
8	98	15	8.218277449	28	m	m	6	d	5	.	n	n	n	n	n	n	n	y	n	n	8.133	2.388633333	6								1								0	1								8.133
8	98	15	8.218277449	28	m	m	7	r		.	n	n	n	n	y	n	n	n	n	n	33.762	2.388633333	6										1
8	104	17.75	7.922419461	36	m	m	1	p	0	n	n	n	n	n	n	n	n	n	n	n	5.545	12.89076667	8	1																	5.545
8	104	17.75	7.922419461	36	m	m	2	c	1	.	n	n	n	n	n	n	n	n	n	n	8.534	12.89076667	8		1																	8.534
8	104	17.75	7.922419461	36	m	m	3	g	2	.	y	n	n	n	n	n	n	n	n	n	25.194	12.89076667	8				1																		25.194
8	104	17.75	7.922419461	36	m	m	4	b	3	.	n	y	y	n	n	n	n	n	n	n	31.11	12.89076667	8						1								1	1								31.11
8	104	17.75	7.922419461	36	m	m	5	k	4	.	n	n	n	n	n	n	n	n	n	n	10.71	12.89076667	8							1																	10.71
8	104	17.75	7.922419461	36	m	m	6	k	5	.	n	n	n	n	n	n	n	n	n	n	33.218	12.89076667	8							1																	33.218
8	104	17.75	7.922419461	36	m	m	7	d	6	.	n	n	n	n	n	n	n	y	n	n	7.31	12.89076667	8								1								0	1								7.31
8	104	17.75	7.922419461	36	m	m	8	r		.	n	n	n	n	y	n	n	n	n	n	10.37	12.89076667	8										1
8	104	17.75	7.922419461	36	m	m	9	d	7	.	n	n	n	n	n	n	n	n	y	y	3.298	12.89076667	8								1								1	0								3.298
8	104	17.75	7.922419461	36	m	m	10	m		.	n	n	n	y	n	n	n	n	n	n	426.224	12.89076667	8									1																	426.224
20	105	11.5	19.95397765	28	m	m	1	p	0	n	n	n	n	n	n	n	n	n	n	n	5.449	12.95176667	9	1																	5.449
20	105	11.5	19.95397765	28	m	m	2	c	1	.	n	n	n	n	n	n	n	n	n	n	4.487	12.95176667	9		1																	4.487
20	105	11.5	19.95397765	28	m	m	3	l	2	.	y	n	n	n	n	n	n	n	n	n	9.214	12.95176667	9			1																	9.214
20	105	11.5	19.95397765	28	m	m	4	g	3	.	y	n	n	n	n	n	n	n	n	n	24.48	12.95176667	9				1																		24.48
20	105	11.5	19.95397765	28	m	m	5	k	4	.	n	n	n	n	n	n	n	n	n	n	8.38	12.95176667	9							1																	8.38
20	105	11.5	19.95397765	28	m	m	6	b	5	.	n	y	n	n	n	y	y	n	n	n	27.738	12.95176667	9						1								0									27.738
20	105	11.5	19.95397765	28	m	m	7	k	6	.	n	n	n	n	n	n	n	n	n	n	12.614	12.95176667	9							1																	12.614
20	105	11.5	19.95397765	28	m	m	8	d	7	.	n	n	n	n	n	n	n	y	n	n	8.547	12.95176667	9								1								0	1								8.547
20	105	11.5	19.95397765	28	m	m	9	r		.	n	n	n	n	y	n	n	n	n	n	132.184	12.95176667	9										1
20	105	11.5	19.95397765	28	m	m	10	r		.	n	n	n	n	y	n	n	n	n	n	10.404	12.95176667	9										1
20	105	11.5	19.95397765	28	m	m	11	r		.	n	n	n	n	y	n	n	n	n	n	109.413	12.95176667	9										1
20	105	11.5	19.95397765	28	m	m	12	d	8	.	n	n	n	n	y	n	n	n	y	y	11.998	12.95176667	9								1								1	0								11.998
20	105	11.5	19.95397765	28	m	m	13	r		.	n	n	n	n	y	n	n	n	n	n	99.824	12.95176667	9										1
20	105	11.5	19.95397765	28	m	m	14	r		.	n	n	n	n	y	n	n	n	n	n	76.058	12.95176667	9										1
20	105	11.5	19.95397765	28	m	m	15	r		.	n	n	n	n	y	n	n	n	n	n	40.596	12.95176667	9										1
20	105	11.5	19.95397765	28	m	m	16	r		.	n	n	n	n	y	n	n	n	n	n	24.412	12.95176667	9										1
12	106		11.7357002	26	m	f	1	p	0	n	n	n	n	n	n	y	n	n	n	n	4.24	16.92216667	7	1																	4.24
12	106		11.7357002	26	m	f	2	c	1	.	n	n	n	n	n	n	n	n	n	n	6.426	16.92216667	7		1																	6.426
12	106		11.7357002	26	m	f	3	l	2	.	y	n	n	n	n	n	n	n	n	n	4.726	16.92216667	7			1																	4.726
12	106		11.7357002	26	m	f	4	g	3	.	y	n	n	n	n	n	n	n	n	n	15.425	16.92216667	7				1																		15.425
12	106		11.7357002	26	m	f	5	k	4	.	n	n	n	n	n	n	n	n	n	n	7.956	16.92216667	7							1																	7.956
12	106		11.7357002	26	m	f	6	b	5	.	n	y	n	n	n	n	n	n	n	n	16.103	16.92216667	7						1								0									16.103
12	106		11.7357002	26	m	f	7	d	6	y	n	n	n	n	n	n	n	y	y	y	4.216	16.92216667	7								1				1				1	1								4.216
12	106		11.7357002	26	m	f	8	r		.	n	n	n	n	y	n	n	n	n	n	4.716	16.92216667	7										1
12	106		11.7357002	26	m	f	9	r		.	n	n	n	n	y	n	n	n	n	n	16.722	16.92216667	7										1
12	106		11.7357002	26	m	f	10	m		.	n	n	n	y	n	n	n	n	n	n	395.082	16.92216667	7									1																	395.082
12	106		11.7357002	26	m	f	11	r		.	n	n	n	n	y	n	n	n	n	n	39.066	16.92216667	7										1
12	106		11.7357002	26	m	f	12	r		.	n	y	y	n	y	y	n	n	n	n	35.731	16.92216667	7										1
12	106		11.7357002	26	m	f	13	r		.	n	n	n	n	y	n	n	n	n	n	214.401	16.92216667	7										1
12	106		11.7357002	26	m	f	14	r		.	n	n	n	n	y	n	n	n	n	n	29.63	16.92216667	7										1
12	106		11.7357002	26	m	f	15	r		.	n	n	n	n	y	n	n	n	n	n	77.518	16.92216667	7										1
16	107	13.5	16.17357002	31	m	f	1	p	0	n	n	n	n	n	n	n	n	n	n	n	2.531	24.92993333	8	1																	2.531
16	107	13.5	16.17357002	31	m	f	2	c	1	.	n	n	n	n	n	n	n	n	n	n	2.501	24.92993333	8		1																	2.501
16	107	13.5	16.17357002	31	m	f	3	l	2	.	y	n	n	n	n	n	n	n	n	n	9.894	24.92993333	8			1																	9.894
16	107	13.5	16.17357002	31	m	f	4	g	3	.	y	n	n	n	n	n	n	n	n	n	17.858	24.92993333	8				1																		17.858
16	107	13.5	16.17357002	31	m	f	5	b	4	.	n	y	y	n	n	n	n	n	n	n	22.333	24.92993333	8						1								1	1								22.333
16	107	13.5	16.17357002	31	m	f	6	k	5	.	n	n	n	n	n	n	n	n	n	n	15.363	24.92993333	8							1																	15.363
16	107	13.5	16.17357002	31	m	f	7	d	6	.	n	n	n	n	n	n	n	y	n	n	5.112	24.92993333	8								1								0	1								5.112
16	107	13.5	16.17357002	31	m	f	8	r		.	n	n	n	n	y	n	n	n	n	n	83.291	24.92993333	8										1
16	107	13.5	16.17357002	31	m	f	9	t		.	n	n	n	y	n	n	n	n	n	n	60.01	24.92993333	8											1
16	107	13.5	16.17357002	31	m	f	10	r		.	n	n	n	n	y	n	n	n	n	n	6.528	24.92993333	8										1
16	107	13.5	16.17357002	31	m	f	11	d	7	.	n	n	n	n	y	n	n	n	y	y	2.372	24.92993333	8								1								1	0								2.372
16	107	13.5	16.17357002	31	m	f	12	r		.	n	n	n	n	y	n	n	n	n	n	1019.762	24.92993333	8										1
12	109	16	12.22879684	34	m	m	1	p	0	n	n	n	n	n	n	y	n	n	n	n	2.973	5.443916667	11	1																	2.973
12	109	16	12.22879684	34	m	m	2	c	1	.	n	n	n	y	n	n	n	n	n	n	9.578	5.443916667	11		1																	9.578
12	109	16	12.22879684	34	m	m	3	l	2	.	y	n	n	y	n	n	n	n	n	n	13.668	5.443916667	11			1																	13.668
12	109	16	12.22879684	34	m	m	4	g	3	.	y	n	n	y	n	n	n	n	n	n	18.632	5.443916667	11				1																		18.632
12	109	16	12.22879684	34	m	m	5	k	4	.	n	n	n	y	n	n	n	n	n	n	11.016	5.443916667	11							1																	11.016
12	109	16	12.22879684	34	m	m	6	a	5	.	n	y	y	n	n	n	n	n	n	n	5.78	5.443916667	11					1								1		1						5.78
12	109	16	12.22879684	34	m	m	7	b	6	.	n	y	y	n	y	n	n	n	n	n	20.128	5.443916667	11						1								1	1								20.128
12	109	16	12.22879684	34	m	m	8	r		.	n	n	n	n	y	n	n	n	n	n	10.608	5.443916667	11										1
12	109	16	12.22879684	34	m	m	9	k	7	.	n	n	n	n	y	n	n	n	n	n	9.792	5.443916667	11							1																	9.792
12	109	16	12.22879684	34	m	m	10	d	8	.	n	n	n	n	y	n	n	y	n	n	7.99	5.443916667	11								1								0	1								7.99
12	109	16	12.22879684	34	m	m	11	d	9	.	n	n	n	n	y	n	n	n	y	y	9.894	5.443916667	11								1								1	0								9.894
12	109	16	12.22879684	34	m	m	12	r		.	n	n	n	n	y	n	n	n	n	n	13.191	5.443916667	11										1
12	109	16	12.22879684	34	m	m	13	d	10	.	n	n	n	n	y	n	n	n	y	y	14.483	5.443916667	11								1								1	0								14.483
12	109	16	12.22879684	34	m	m	14	r		.	n	n	n	n	y	n	n	n	n	n	82.178	5.443916667	11										1
16	110	18	15.74621959	27	m	f	1	p	0	n	n	n	n	n	n	n	n	n	n	n	3.959	22.27556667	7	1																	3.959
16	110	18	15.74621959	27	m	f	2	c	1	.	n	n	n	n	n	n	n	n	n	n	3.4	22.27556667	7		1																	3.4
16	110	18	15.74621959	27	m	f	3	g	2	.	y	n	n	n	n	n	n	n	n	n	20.842	22.27556667	7				1																		20.842
16	110	18	15.74621959	27	m	f	4	b	3	.	n	y	n	n	n	n	n	n	n	n	34.429	22.27556667	7						1								0									34.429
16	110	18	15.74621959	27	m	f	5	k	4	.	n	n	n	n	n	n	n	n	n	n	10.084	22.27556667	7							1																	10.084
16	110	18	15.74621959	27	m	f	6	d	5	.	n	n	n	n	n	n	n	y	n	n	4.93	22.27556667	7								1								0	1								4.93
16	110	18	15.74621959	27	m	f	7	t		.	n	n	n	y	n	y	n	n	n	n	192.338	22.27556667	7											1
16	110	18	15.74621959	27	m	f	8	r		.	n	n	n	n	y	n	n	n	n	n	126.208	22.27556667	7										1
16	110	18	15.74621959	27	m	f	9	d	6	.	n	n	n	n	n	n	n	n	y	y	6.423	22.27556667	7								1								1	0								6.423
8	111	10	7.955292571	27	m	f	1	p	0	n	n	n	n	n	n	n	n	n	n	n	3.409	18.9477	9	1																	3.409
8	111	10	7.955292571	27	m	f	2	c	1	.	n	n	n	n	n	n	n	n	n	n	7.114	18.9477	9		1																	7.114
8	111	10	7.955292571	27	m	f	3	l	2	.	y	n	n	n	n	n	n	n	n	n	13.604	18.9477	9			1																	13.604
8	111	10	7.955292571	27	m	f	4	g	3	.	y	n	n	n	n	n	n	n	n	n	22.286	18.9477	9				1																		22.286
8	111	10	7.955292571	27	m	f	5	b	4	.	n	y	y	n	n	n	n	n	n	n	23.97	18.9477	9						1								1	1								23.97
8	111	10	7.955292571	27	m	f	6	k	5	.	n	n	n	n	y	y	n	n	n	n	19.45	18.9477	9							1																	19.45
8	111	10	7.955292571	27	m	f	7	d	6	.	n	n	n	n	y	y	n	y	n	n	4.069	18.9477	9								1								0	1								4.069
8	111	10	7.955292571	27	m	f	8	d	7	.	n	n	n	n	y	n	n	n	y	y	8.868	18.9477	9								1								1	0								8.868
8	111	10	7.955292571	27	m	f	9	d	8	.	n	n	n	n	y	n	n	y	y	y	12.444	18.9477	9								1								1	1								12.444
16	112	11.83333333	15.84483892	29	m	m	1	p	0	n	n	n	n	n	n	n	n	n	n	n	3.596	3.746666667	6	1																	3.596
16	112	11.83333333	15.84483892	29	m	m	2	c	1	.	n	n	n	n	n	n	n	n	n	n	7.072	3.746666667	6		1																	7.072
16	112	11.83333333	15.84483892	29	m	m	3	g	2	.	y	n	n	n	n	n	n	n	n	n	17.062	3.746666667	6				1																		17.062
16	112	11.83333333	15.84483892	29	m	m	4	b	3	.	n	y	n	n	n	n	n	n	n	n	20.74	3.746666667	6						1								0									20.74
16	112	11.83333333	15.84483892	29	m	m	5	k	4	.	n	n	n	n	n	n	n	n	n	n	12.886	3.746666667	6							1																	12.886
16	112	11.83333333	15.84483892	29	m	m	6	d	5	.	n	n	n	n	n	n	n	y	n	n	18.243	3.746666667	6								1								0	1								18.243
16	112	11.83333333	15.84483892	29	m	m	7	t		.	n	n	n	y	n	n	n	n	n	n	81.905	3.746666667	6											1
20	115	6.25	19.92110454	25	.	f	1	p	0	y	n	n	n	n	n	y	n	n	n	n	4.68	4.84915	6	1											1						4.68
20	115	6.25	19.92110454	25	.	f	2	c	1	.	n	n	n	n	n	y	n	n	n	n	2.21	4.84915	6		1																	2.21
20	115	6.25	19.92110454	25	.	f	3	g	2	.	y	n	n	n	n	n	n	n	n	n	10.268	4.84915	6				1																		10.268
20	115	6.25	19.92110454	25	.	f	4	b	3	.	n	y	y	n	n	y	y	n	n	n	27.183	4.84915	6						1								1	1								27.183
20	115	6.25	19.92110454	25	.	f	5	k	4	.	n	n	n	n	n	y	n	n	n	n	16.751	4.84915	6							1																	16.751
20	115	6.25	19.92110454	25	.	f	6	d	5	.	n	n	n	n	y	y	n	y	y	y	9.347	4.84915	6								1								1	1								9.347
20	115	6.25	19.92110454	25	.	f	7	r		.	n	n	n	n	y	y	n	n	n	n	8.84	4.84915	6										1
8	116	17.16666667	8.08678501	20	m	f	1	p	0	n	n	n	n	n	n	n	n	n	n	n	4.117	4.302233333	10	1																	4.117
8	116	17.16666667	8.08678501	20	m	f	2	c	1	.	n	n	n	n	n	n	n	n	n	n	4.013	4.302233333	10		1																	4.013
8	116	17.16666667	8.08678501	20	m	f	3	l	2	.	y	n	n	n	n	n	n	n	n	n	14.563	4.302233333	10			1																	14.563
8	116	17.16666667	8.08678501	20	m	f	4	g	3	.	y	n	n	n	n	n	n	n	n	n	19.224	4.302233333	10				1																		19.224
8	116	17.16666667	8.08678501	20	m	f	5	a	4	.	n	y	y	n	n	n	n	n	n	n	17.054	4.302233333	10					1								1		1						17.054
8	116	17.16666667	8.08678501	20	m	f	6	a	5	.	n	y	y	n	n	n	n	n	n	n	8.67	4.302233333	10					1								1		1						8.67
8	116	17.16666667	8.08678501	20	m	f	7	b	6	.	n	y	y	n	n	n	n	n	n	n	21.085	4.302233333	10						1								1	1								21.085
8	116	17.16666667	8.08678501	20	m	f	8	k	7	.	n	n	n	n	n	n	n	n	n	n	20.704	4.302233333	10							1																	20.704
8	116	17.16666667	8.08678501	20	m	f	9	d	8	.	n	n	n	n	n	n	n	y	n	n	11.379	4.302233333	10								1								0	1								11.379
8	116	17.16666667	8.08678501	20	m	f	10	d	9	.	n	n	n	n	n	n	n	n	y	n	9.588	4.302233333	10								1								0	0								9.588
8	116	17.16666667	8.08678501	20	m	f	11	r		.	n	n	n	n	y	n	n	n	n	n	20.7	4.302233333	10										1
8	116	17.16666667	8.08678501	20	m	f	12	r		.	n	n	n	n	y	n	n	n	n	n	3.572	4.302233333	10										1
20	117	12.5	20.08547009	27	m	f	1	p	0	n	n	n	n	n	n	n	n	n	n	n	1.945	5.359066667	10	1																	1.945
20	117	12.5	20.08547009	27	m	f	2	c	1	.	n	n	n	n	n	n	n	n	n	n	2.38	5.359066667	10		1																	2.38
20	117	12.5	20.08547009	27	m	f	3	l	2	.	y	n	n	n	n	n	n	n	n	n	9.792	5.359066667	10			1																	9.792
20	117	12.5	20.08547009	27	m	f	4	g	3	.	y	n	n	n	n	n	n	n	n	n	19.956	5.359066667	10				1																		19.956
20	117	12.5	20.08547009	27	m	f	5	a	4	.	n	y	y	n	n	n	n	n	n	n	16.422	5.359066667	10					1								1		1						16.422
20	117	12.5	20.08547009	27	m	f	6	a	5	.	n	y	y	n	n	n	n	n	n	n	7.412	5.359066667	10					1								1		1						7.412
20	117	12.5	20.08547009	27	m	f	7	b	6	.	n	y	y	n	n	n	n	n	n	n	18.36	5.359066667	10						1								1	1								18.36
20	117	12.5	20.08547009	27	m	f	8	k	7	.	n	n	n	n	n	n	n	n	n	n	11.696	5.359066667	10							1																	11.696
20	117	12.5	20.08547009	27	m	f	9	d	8	.	n	n	n	n	n	n	n	y	n	n	12.357	5.359066667	10								1								0	1								12.357
20	117	12.5	20.08547009	27	m	f	10	d	9	.	n	n	n	n	n	n	n	y	n	n	7.99	5.359066667	10								1								0	1								7.99
12	118	11.91666667	12.16305062	31	m	f	1	p	0	y	n	n	n	n	n	n	n	n	n	n		19.744	6	1											1
12	118	11.91666667	12.16305062	31	m	f	2	c	1	.	n	n	n	n	n	n	n	n	n	n	2.614	19.744	6		1																	2.614
12	118	11.91666667	12.16305062	31	m	f	3	g	2	.	y	n	n	n	n	n	n	n	n	n	12.202	19.744	6				1																		12.202
12	118	11.91666667	12.16305062	31	m	f	4	b	3	.	n	y	y	n	n	n	n	n	n	n	13.392	19.744	6						1								1	1								13.392
12	118	11.91666667	12.16305062	31	m	f	5	k	4	.	n	n	n	n	n	n	n	n	n	n	14.051	19.744	6							1																	14.051
12	118	11.91666667	12.16305062	31	m	f	6	d	5	.	n	n	n	n	n	y	n	y	n	n	7.738	19.744	6								1								0	1								7.738
12	118	11.91666667	12.16305062	31	m	f	7	m		.	n	n	n	y	n	n	n	n	y	y	325.398	19.744	6									1																	325.398
12	118	11.91666667	12.16305062	31	m	f	8	r		.	n	n	n	n	y	n	n	n	y	y	337.17	19.744	6										1
12	118	11.91666667	12.16305062	31	m	f	9	m		.	n	n	n	y	n	n	n	n	n	n	74.317	19.744	6									1																	74.317
8	119	16.25	7.067718606	25	m	f	1	p	0	n	n	n	n	n	n	n	n	n	n	n	6.503	22.73146667	11	1																	6.503
8	119	16.25	7.067718606	25	m	f	2	c	1	.	n	n	n	n	n	n	n	n	n	n	2.768	22.73146667	11		1																	2.768
8	119	16.25	7.067718606	25	m	f	3	l	2	.	y	n	n	n	n	n	n	n	n	n	7.258	22.73146667	11			1																	7.258
8	119	16.25	7.067718606	25	m	f	4	l	3	.	n	n	n	n	n	n	n	n	n	n	2.924	22.73146667	11			1																	2.924
8	119	16.25	7.067718606	25	m	f	5	g	4	.	y	n	n	n	n	y	n	n	n	n	22.424	22.73146667	11				1																		22.424
8	119	16.25	7.067718606	25	m	f	6	a	5	.	n	y	n	n	n	y	n	n	n	n	10.83	22.73146667	11					1								0								10.83
8	119	16.25	7.067718606	25	m	f	7	a	6	.	n	y	y	n	y	y	n	n	n	n	11.764	22.73146667	11					1								1		1						11.764
8	119	16.25	7.067718606	25	m	f	8	b	7	.	n	y	y	n	y	y	n	n	n	n	27.078	22.73146667	11						1								1	1								27.078
8	119	16.25	7.067718606	25	m	f	9	k	8	.	n	n	n	n	n	y	n	n	n	n	15.81	22.73146667	11							1																	15.81
8	119	16.25	7.067718606	25	m	f	10	d	9	.	n	n	n	n	n	y	n	y	n	n	1.972	22.73146667	11								1								0	1								1.972
8	119	16.25	7.067718606	25	m	f	11	d	10	.	n	n	n	n	n	y	n	y	n	n	4.012	22.73146667	11								1								0	1								4.012
8	119	16.25	7.067718606	25	m	f	12	m		.	n	n	n	y	n	n	n	n	n	n	189.187	22.73146667	11									1																	189.187
8	119	16.25	7.067718606	25	m	f	13	r		.	n	n	n	n	y	n	n	n	n	n	373.014	22.73146667	11										1
8	119	16.25	7.067718606	25	m	f	14	r		.	n	n	n	n	y	n	n	n	n	n	413.357	22.73146667	11										1
16	120	13.5	15.68047337	23	m	m	1	p	0	y	n	n	n	n	n	n	n	n	n	n	4.464	30.68296667	7	1											1						4.464
16	120	13.5	15.68047337	23	m	m	2	c	1	.	n	n	n	n	n	n	n	n	n	n	12.691	30.68296667	7		1																	12.691
16	120	13.5	15.68047337	23	m	m	3	g	2	.	y	n	n	n	n	n	n	n	n	n	32.37	30.68296667	7				1																		32.37
16	120	13.5	15.68047337	23	m	m	4	b	3	.	n	y	y	n	y	n	n	n	n	n	41.068	30.68296667	7						1								1	1								41.068
16	120	13.5	15.68047337	23	m	m	5	k	4	.	n	n	n	n	n	n	n	n	n	n	21.468	30.68296667	7							1																	21.468
16	120	13.5	15.68047337	23	m	m	6	d	5	.	n	n	n	n	n	n	n	y	n	n	8.205	30.68296667	7								1								0	1								8.205
16	120	13.5	15.68047337	23	m	m	7	d	6	.	n	n	n	n	n	n	n	n	y	n	1.839	30.68296667	7								1								0	0								1.839
16	120	13.5	15.68047337	23	m	m	8	m		.	n	n	n	y	n	n	n	n	n	n	535.368	30.68296667	7									1																	535.368
16	120	13.5	15.68047337	23	m	m	9	r		.	n	n	n	n	y	n	n	n	n	n	11.764	30.68296667	7										1
16	120	13.5	15.68047337	23	m	m	10	m		.	n	n	n	y	n	n	n	n	n	n	147.968	30.68296667	7									1																	147.968
16	120	13.5	15.68047337	23	m	m	11	r		.	n	n	n	n	y	n	n	n	n	n	944.214	30.68296667	7										1
20	121	17.66666667	18.73767258	22	m	f	1	p	0	y	n	n	n	n	n	n	n	n	n	n	3.412	4.7062	7	1											1						3.412
20	121	17.66666667	18.73767258	22	m	f	2	c	1	.	n	n	n	n	n	y	n	n	n	n	3.74	4.7062	7		1																	3.74
20	121	17.66666667	18.73767258	22	m	f	3	g	2	.	y	n	n	n	y	y	n	n	n	n	16.46	4.7062	7				1																		16.46
20	121	17.66666667	18.73767258	22	m	f	4	b	3	.	n	y	y	n	y	n	n	n	n	n	22.168	4.7062	7						1								1	1								22.168
20	121	17.66666667	18.73767258	22	m	f	5	k	4	.	n	n	n	n	n	n	n	n	n	n	17.34	4.7062	7							1																	17.34
20	121	17.66666667	18.73767258	22	m	f	6	d	5	.	n	n	n	n	y	y	n	y	n	n	5.894	4.7062	7								1								0	1								5.894
20	121	17.66666667	18.73767258	22	m	f	7	d	6	.	n	n	n	n	y	n	n	n	y	n	9.848	4.7062	7								1								0	0								9.848
20	121	17.66666667	18.73767258	22	m	f	8	r		.	n	n	n	n	y	n	n	n	n	n	8.806	4.7062	7										1
8	122	9.5	7.133464826	23	m	f	1	p	0	n	n	n	n	n	n	n	n	n	n	n	2.972	10.90266667	6	1																	2.972
8	122	9.5	7.133464826	23	m	f	2	c	1	.	n	n	n	n	n	n	n	n	n	n	7.465	10.90266667	6		1																	7.465
8	122	9.5	7.133464826	23	m	f	3	g	2	.	y	n	n	n	n	n	n	n	n	n	25.707	10.90266667	6				1																		25.707
8	122	9.5	7.133464826	23	m	f	4	b	3	.	n	y	y	n	n	n	n	n	n	n	29.725	10.90266667	6						1								1	1								29.725
8	122	9.5	7.133464826	23	m	f	5	k	4	.	n	n	n	n	y	n	n	n	n	n	19.721	10.90266667	6							1																	19.721
8	122	9.5	7.133464826	23	m	f	6	d	5	.	n	n	n	n	y	n	n	y	n	n	14.075	10.90266667	6								1								0	1								14.075
8	122	9.5	7.133464826	23	m	f	7	r		.	n	n	n	n	y	n	n	n	n	n	14.714	10.90266667	6										1
8	122	9.5	7.133464826	23	m	f	8	m		.	n	n	n	y	n	n	n	n	y	y	166.984	10.90266667	6									1																	166.984
24	123	3.333333333	23.66863905	31	m	f	1	p	0	n	n	n	n	n	n	n	n	n	n	n	2.695	3.396783333	6	1																	2.695
24	123	3.333333333	23.66863905	31	m	f	2	c	1	.	n	n	n	n	n	n	n	n	n	n	4.896	3.396783333	6		1																	4.896
24	123	3.333333333	23.66863905	31	m	f	3	l	2	.	y	n	n	n	n	n	n	n	n	n	5.644	3.396783333	6			1																	5.644
24	123	3.333333333	23.66863905	31	m	f	4	g	3	.	y	n	n	n	n	n	n	n	n	n	19.244	3.396783333	6				1																		19.244
24	123	3.333333333	23.66863905	31	m	f	5	b	4	.	n	y	y	n	n	n	n	n	n	n	29.852	3.396783333	6						1								1	1								29.852
24	123	3.333333333	23.66863905	31	m	f	6	d	5	.	n	n	n	n	n	n	n	y	n	n	7.344	3.396783333	6								1								0	1								7.344
24	123	3.333333333	23.66863905	31	m	f	7	r		.	n	n	n	n	y	n	n	n	n	n	41.786	3.396783333	6										1
16	124	2.25	15.87771203	20	m	m	1	p	0	y	n	n	n	n	n	n	n	n	n	n	2.938	5.9969	6	1											1						2.938
16	124	2.25	15.87771203	20	m	m	2	c	1	.	n	n	n	n	n	n	n	n	n	n	4.896	5.9969	6		1																	4.896
16	124	2.25	15.87771203	20	m	m	3	g	2	.	y	n	n	n	n	n	n	n	n	n	12.512	5.9969	6				1																		12.512
16	124	2.25	15.87771203	20	m	m	4	b	3	.	n	y	n	n	n	y	y	n	n	n	14.212	5.9969	6						1								0									14.212
16	124	2.25	15.87771203	20	m	m	5	k	4	.	n	n	n	n	n	n	n	n	n	n	8.16	5.9969	6							1																	8.16
16	124	2.25	15.87771203	20	m	m	6	d	5	.	n	n	n	n	n	y	n	y	n	n	12.206	5.9969	6								1								0	1								12.206
16	124	2.25	15.87771203	20	m	m	7	t		.	n	n	n	y	n	n	n	n	n	n	118.99	5.9969	6											1
20	125	17.08333333	19.85535832	24	m	m	1	p	0	n	n	n	n	n	n	n	n	n	n	n	3.213	2.35405	8	1																	3.213
20	125	17.08333333	19.85535832	24	m	m	2	c	1	.	n	n	n	n	n	n	n	n	n	n	4.114	2.35405	8		1																	4.114
20	125	17.08333333	19.85535832	24	m	m	3	l	2	.	y	n	n	n	n	n	n	n	n	n	6.63	2.35405	8			1																	6.63
20	125	17.08333333	19.85535832	24	m	m	4	g	3	.	y	n	n	n	n	n	n	n	n	n	14.042	2.35405	8				1																		14.042
20	125	17.08333333	19.85535832	24	m	m	5	k	4	.	n	n	n	n	n	n	n	n	n	n	4.522	2.35405	8							1																	4.522
20	125	17.08333333	19.85535832	24	m	m	6	k	5	.	n	n	n	n	n	n	n	n	n	n	6.562	2.35405	8							1																	6.562
20	125	17.08333333	19.85535832	24	m	m	7	b	6	.	n	y	n	n	n	n	n	n	n	n	24.276	2.35405	8						1								0									24.276
20	125	17.08333333	19.85535832	24	m	m	8	d	7	.	n	n	n	n	n	n	n	y	n	n	6.392	2.35405	8								1								0	1								6.392
8	126		8.218277449	21	m	m	1	p	0	n	n	n	n	n	n	n	n	n	n	n	4.273	5.9364	7	1																	4.273
8	126		8.218277449	21	m	m	2	c	1	.	n	n	n	n	n	n	n	n	n	n	6.561	5.9364	7		1																	6.561
8	126		8.218277449	21	m	m	3	l	2	.	y	n	n	n	n	n	n	n	n	n	6.935	5.9364	7			1																	6.935
8	126		8.218277449	21	m	m	4	g	3	.	y	n	n	n	n	n	n	n	n	n	21.658	5.9364	7				1																		21.658
8	126		8.218277449	21	m	m	5	b	4	.	n	y	y	n	n	n	n	n	n	n	24.82	5.9364	7						1								1	1								24.82
8	126		8.218277449	21	m	m	6	k	5	.	n	n	n	n	y	n	n	n	n	n	17.883	5.9364	7							1																	17.883
8	126		8.218277449	21	m	m	7	d	6	.	n	n	n	n	n	n	n	y	n	n	9.961	5.9364	7								1								0	1								9.961
8	126		8.218277449	21	m	m	8	r		.	n	n	n	n	y	n	n	n	n	n	46.24	5.9364	7										1
20	127	5.583333333	19.88823143	27	m	m	1	p	0	y	n	n	n	y	n	n	n	n	n	n	4.829	7.062366667	7	1											1						4.829
20	127	5.583333333	19.88823143	27	m	m	2	c	1	.	n	n	n	y	n	n	n	n	n	n	4.692	7.062366667	7		1																	4.692
20	127	5.583333333	19.88823143	27	m	m	3	g	2	.	y	n	n	y	n	n	n	n	n	n	23.154	7.062366667	7				1																		23.154
20	127	5.583333333	19.88823143	27	m	m	4	b	3	.	n	y	n	y	n	n	n	n	n	n	21.182	7.062366667	7						1								0									21.182
20	127	5.583333333	19.88823143	27	m	m	5	k	4	.	n	n	n	y	n	n	n	n	n	n	13.022	7.062366667	7							1																	13.022
20	127	5.583333333	19.88823143	27	m	m	6	d	5	.	n	n	n	y	n	n	n	y	n	n	4.726	7.062366667	7								1								0	1								4.726
20	127	5.583333333	19.88823143	27	m	m	7	r		.	n	n	n	n	y	n	n	n	n	n	61.019	7.062366667	7										1
20	127	5.583333333	19.88823143	27	m	m	8	d	6	.	n	n	n	n	n	n	n	n	y	y	4.046	7.062366667	7								1								1	0								4.046
24	128	14	23.76725838	24	m	m	1	p	0	n	n	n	n	n	n	n	n	n	n	n	4.4	8.140216667	8	1																	4.4
24	128	14	23.76725838	24	m	m	2	c	1	.	n	n	n	n	n	n	n	n	n	n	7.446	8.140216667	8		1																	7.446
24	128	14	23.76725838	24	m	m	3	l	2	.	y	n	n	n	n	n	n	n	n	n	14.382	8.140216667	8			1																	14.382
24	128	14	23.76725838	24	m	m	4	g	3	.	y	n	n	n	n	n	n	n	n	n	20.699	8.140216667	8				1																		20.699
24	128	14	23.76725838	24	m	m	5	b	4	.	n	y	y	n	n	n	n	n	n	n	25.723	8.140216667	8						1								1	1								25.723
24	128	14	23.76725838	24	m	m	6	k	5	.	n	n	n	n	n	n	n	n	n	n	7.616	8.140216667	8							1																	7.616
24	128	14	23.76725838	24	m	m	7	d	6	.	n	n	n	n	n	n	n	y	n	n	5.1	8.140216667	8								1								0	1								5.1
24	128	14	23.76725838	24	m	m	8	d	7	.	n	n	n	n	n	n	n	n	y	y	7.99	8.140216667	8								1								1	0								7.99
24	128	14	23.76725838	24	m	m	9	r		.	n	n	n	n	y	n	n	n	n	n	8.666	8.140216667	8										1
16	129	11.5	16.17357002	27	m	m	1	p	0	y	n	n	n	n	n	y	n	n	n	n	1.824	1.687916667	6	1											1						1.824
16	129	11.5	16.17357002	27	m	m	2	c	1	.	n	n	n	n	n	y	n	n	n	n	6.018	1.687916667	6		1																	6.018
16	129	11.5	16.17357002	27	m	m	3	g	2	.	y	n	n	n	n	y	y	n	n	n	11.496	1.687916667	6				1																		11.496
16	129	11.5	16.17357002	27	m	m	4	b	3	.	n	y	y	n	y	y	n	n	n	n	20.162	1.687916667	6						1								1	1								20.162
16	129	11.5	16.17357002	27	m	m	5	k	4	.	n	n	n	n	n	y	n	n	n	n	6.46	1.687916667	6							1																	6.46
16	129	11.5	16.17357002	27	m	m	6	d	5	.	n	n	n	n	y	y	n	y	n	n	5.1	1.687916667	6								1								0	1								5.1
16	130	16	15.71334648	29	m	f	1	p	0	n	n	n	n	n	n	y	n	n	n	n	22.493	3.00095	8	1																	22.493
16	130	16	15.71334648	29	m	f	2	c	1	.	n	n	n	n	n	n	n	n	n	n	5.032	3.00095	8		1																	5.032
16	130	16	15.71334648	29	m	f	3	l	2	.	y	n	n	n	n	n	n	n	n	n	6.052	3.00095	8			1																	6.052
16	130	16	15.71334648	29	m	f	4	g	3	.	y	n	n	n	n	n	n	n	n	n	23.29	3.00095	8				1																		23.29
16	130	16	15.71334648	29	m	f	5	k	4	.	n	n	n	n	n	n	n	n	n	n	7.31	3.00095	8							1																	7.31
16	130	16	15.71334648	29	m	f	6	k	5	.	n	n	n	n	n	n	n	n	n	n	7.99	3.00095	8							1																	7.99
16	130	16	15.71334648	29	m	f	7	b	6	.	n	y	y	n	n	n	n	n	n	n	26.384	3.00095	8						1								1	1								26.384
16	130	16	15.71334648	29	m	f	8	d	7	.	n	n	n	n	n	n	n	y	n	n	8.432	3.00095	8								1								0	1								8.432
12	131		12.16305062	30	m	m	1	p	0	n	n	n	n	n	n	y	y	n	n	n	8.865	12.72038333	8	1																	8.865
12	131		12.16305062	30	m	m	2	c	1	.	n	n	n	n	n	y	y	n	n	n	12.648	12.72038333	8		1																	12.648
12	131		12.16305062	30	m	m	3	g	2	.	y	n	n	n	n	y	n	n	n	n	19.244	12.72038333	8				1																		19.244
12	131		12.16305062	30	m	m	4	g	3	.	y	n	n	n	n	y	y	n	n	n	13.158	12.72038333	8				1																		13.158
12	131		12.16305062	30	m	m	5	b	4	.	n	y	y	n	y	y	y	n	n	n	28.084	12.72038333	8						1								1	1								28.084
12	131		12.16305062	30	m	m	6	d	5	.	n	n	n	n	n	y	n	y	n	n	1.7	12.72038333	8								1								0	1								1.7
12	131		12.16305062	30	m	m	7	m		.	n	n	n	y	n	y	n	n	n	n	186.66	12.72038333	8									1																	186.66
12	131		12.16305062	30	m	m	8	r		.	n	n	n	n	y	y	n	n	n	n	10.468	12.72038333	8										1
12	131		12.16305062	30	m	m	9	m		.	n	n	n	y	n	y	n	n	n	n	103.885	12.72038333	8									1																	103.885
12	131		12.16305062	30	m	m	10	r		.	n	n	n	n	y	n	n	n	n	n	26.427	12.72038333	8										1
12	131		12.16305062	30	m	m	11	k	6	.	n	n	n	n	y	n	n	n	n	n	23.664	12.72038333	8							1																	23.664
12	131		12.16305062	30	m	m	12	d	7	.	n	n	n	n	y	n	n	n	y	y	23.46	12.72038333	8								1								1	0								23.46
12	131		12.16305062	30	m	m	13	r		.	n	n	n	n	y	y	n	n	n	n	22.304	12.72038333	8										1
12	131		12.16305062	30	m	m	14	m		.	n	n	n	y	n	n	n	n	n	n	172.146	12.72038333	8									1																	172.146
12	131		12.16305062	30	m	m	15	r		.	n	n	n	n	y	n	n	n	n	n	2.947	12.72038333	8										1
24	132	13	24.06311637	23	m	m	1	p	0	y	n	n	n	n	n	y	n	n	n	n	8.082	10.24316667	6	1											1						8.082
24	132	13	24.06311637	23	m	m	2	c	1	.	n	n	n	n	n	n	n	n	n	n	5.27	10.24316667	6		1																	5.27
24	132	13	24.06311637	23	m	m	3	g	2	.	y	n	n	n	n	n	n	n	n	n	13.226	10.24316667	6				1																		13.226
24	132	13	24.06311637	23	m	m	4	b	3	.	n	y	y	n	n	n	n	n	n	n	23.528	10.24316667	6						1								1	1								23.528
24	132	13	24.06311637	23	m	m	5	d	4	.	n	n	n	n	n	n	n	y	n	n	4.36	10.24316667	6								1								0	1								4.36
24	132	13	24.06311637	23	m	m	6	t		.	n	n	n	y	n	n	n	n	n	n	9.95	10.24316667	6											1
24	132	13	24.06311637	23	m	m	7	d	5	.	n	n	n	y	n	n	n	y	n	n	7.708	10.24316667	6								1								0	1								7.708
24	132	13	24.06311637	23	m	m	8	t		.	n	n	n	y	n	n	n	n	n	n	492.422	10.24316667	6											1
12	134	18.5	11.86719264	30	m	m	1	p	0	n	n	n	n	n	n	n	n	n	n	n	3.847	4.206933333	8	1																	3.847
12	134	18.5	11.86719264	30	m	m	2	c	1	.	n	n	n	n	n	n	n	n	n	n	2.176	4.206933333	8		1																	2.176
12	134	18.5	11.86719264	30	m	m	3	l	2	.	y	n	n	n	n	n	n	n	n	n	12.138	4.206933333	8			1																	12.138
12	134	18.5	11.86719264	30	m	m	4	k	3	.	n	n	n	n	n	n	n	n	n	n	14.042	4.206933333	8							1																	14.042
12	134	18.5	11.86719264	30	m	m	5	g	4	.	y	n	n	n	n	n	n	n	n	n	30.022	4.206933333	8				1																		30.022
12	134	18.5	11.86719264	30	m	m	6	b	5	.	n	y	y	n	n	n	n	n	n	n	31.178	4.206933333	8						1								1	1								31.178
12	134	18.5	11.86719264	30	m	m	7	k	6	.	n	n	n	n	n	n	n	n	n	n	22.95	4.206933333	8							1																	22.95
12	134	18.5	11.86719264	30	m	m	8	d	7	.	n	n	n	n	n	n	n	y	n	n	9.452	4.206933333	8								1								0	1								9.452
16	136	13.5	16.00920447	28	m	f	1	p	0	y	n	n	n	n	n	n	n	n	n	n	2.943	11.45893333	7	1											1						2.943
16	136	13.5	16.00920447	28	m	f	2	c	1	.	n	n	n	n	n	n	n	n	n	n	5.236	11.45893333	7		1																	5.236
16	136	13.5	16.00920447	28	m	f	3	g	2	.	y	n	n	n	n	n	n	n	n	n	19.652	11.45893333	7				1																		19.652
16	136	13.5	16.00920447	28	m	f	4	b	3	.	n	y	y	n	n	n	n	n	n	n	24.038	11.45893333	7						1								1	1								24.038
16	136	13.5	16.00920447	28	m	f	5	k	4	.	n	n	n	n	n	n	n	n	n	n	13.838	11.45893333	7							1																	13.838
16	136	13.5	16.00920447	28	m	f	6	d	5	.	n	n	n	n	n	n	n	y	n	n	6.902	11.45893333	7								1								0	1								6.902
16	136	13.5	16.00920447	28	m	f	7	d	6	.	n	n	n	n	n	n	n	y	n	n	6.8	11.45893333	7								1								0	1								6.8
16	136	13.5	16.00920447	28	m	f	8	r		.	n	n	n	y	y	n	n	n	y	y	84.66	11.45893333	7										1
16	136	13.5	16.00920447	28	m	f	9	t		.	n	n	n	y	n	n	n	n	n	n	13.652	11.45893333	7											1
16	136	13.5	16.00920447	28	m	f	10	r		.	n	n	n	y	y	n	n	n	n	n	488.119	11.45893333	7										1
16	137	15.5	16.14069691	25	m	f	1	p	0	n	n	n	n	n	n	n	n	n	n	n	3.712	5.389033333	7	1																	3.712
16	137	15.5	16.14069691	25	m	f	2	c	1	.	n	n	n	n	n	n	n	n	n	n	9.588	5.389033333	7		1																	9.588
16	137	15.5	16.14069691	25	m	f	3	g	2	.	y	n	n	n	n	n	n	n	n	n	14.62	5.389033333	7				1																		14.62
16	137	15.5	16.14069691	25	m	f	4	b	3	.	n	y	y	n	n	n	n	n	n	n	15.878	5.389033333	7						1								1	1								15.878
16	137	15.5	16.14069691	25	m	f	5	k	4	.	n	n	n	n	n	n	n	n	n	n	7.31	5.389033333	7							1																	7.31
16	137	15.5	16.14069691	25	m	f	6	k	5	.	n	n	n	n	n	n	n	n	n	n	5.474	5.389033333	7							1																	5.474
16	137	15.5	16.14069691	25	m	f	7	d	6	.	n	n	n	n	n	n	n	y	y	y	11.272	5.389033333	7								1								1	1								11.272
16	137	15.5	16.14069691	25	m	f	8	r		.	n	n	n	n	y	n	n	n	n	n	6.63	5.389033333	7										1
16	137	15.5	16.14069691	25	m	f	9	m		.	n	n	n	y	n	n	n	n	n	n	66.81	5.389033333	7									1																	66.81
16	137	15.5	16.14069691	25	m	f	10	m		.	n	n	n	y	n	n	n	n	n	n	9.01	5.389033333	7									1																	9.01
16	137	15.5	16.14069691	25	m	f	11	m		.	n	n	n	y	n	n	n	n	n	n	13.362	5.389033333	7									1																	13.362
16	137	15.5	16.14069691	25	m	f	12	m		.	n	n	n	y	n	n	n	n	n	n	19.516	5.389033333	7									1																	19.516
20	138	2	20.18408941	22	m	f	1	p	0	y	n	n	n	n	n	n	n	n	n	n	3.808	4.432416667	6	1											1						3.808
20	138	2	20.18408941	22	m	f	2	c	1	.	n	n	n	n	n	n	n	n	n	n	6.698	4.432416667	6		1																	6.698
20	138	2	20.18408941	22	m	f	3	g	2	.	y	n	n	n	n	n	n	n	n	n	10.404	4.432416667	6				1																		10.404
20	138	2	20.18408941	22	m	f	4	b	3	.	n	y	y	n	n	n	n	n	n	n	15.708	4.432416667	6						1								1	1								15.708
20	138	2	20.18408941	22	m	f	5	k	4	.	n	n	n	n	n	n	n	n	n	n	12.002	4.432416667	6							1																	12.002
20	138	2	20.18408941	22	m	f	6	d	5	.	n	n	n	n	n	n	n	y	n	n	3.74	4.432416667	6								1								0	1								3.74
20	138	2	20.18408941	22	m	f	7	r		.	n	n	n	n	y	y	y	n	n	n	99.354	4.432416667	6										1
20	138	2	20.18408941	22	m	f	8	r		.	n	n	n	n	y	y	y	n	n	n	24.814	4.432416667	6										1
20	139	1	19.92110454		g	m	1	p	0	y	n	n	n	n	n	y	n	n	n	n	4.396	16.67496667	8	1											1						4.396
20	139	1	19.92110454		g	m	2	c	1	.	n	n	n	n	n	n	n	n	n	n	5.44	16.67496667	8		1																	5.44
20	139	1	19.92110454		g	m	3	l	2	.	y	n	n	n	n	n	n	n	n	n	5.304	16.67496667	8			1																	5.304
20	139	1	19.92110454		g	m	4	g	3	.	y	n	n	n	n	n	n	n	n	n	17.34	16.67496667	8				1																		17.34
20	139	1	19.92110454		g	m	5	b	4	.	n	y	y	n	n	n	n	n	n	n	26.486	16.67496667	8						1								1	1								26.486
20	139	1	19.92110454		g	m	6	k	5	.	n	n	n	n	y	n	n	n	n	n	13.603	16.67496667	8							1																	13.603
20	139	1	19.92110454		g	m	7	r		.	n	n	n	n	y	n	n	n	n	n	11.488	16.67496667	8										1
20	139	1	19.92110454		g	m	8	d	6	.	n	n	n	n	y	n	n	y	n	n	12.172	16.67496667	8								1								0	1								12.172
20	139	1	19.92110454		g	m	9	r		.	n	n	n	n	y	n	n	n	n	n	6.528	16.67496667	8										1
20	139	1	19.92110454		g	m	10	d	7	.	n	n	n	n	y	n	n	n	y	y	5.474	16.67496667	8								1								1	0								5.474
20	139	1	19.92110454		g	m	11	r		.	n	n	n	n	y	n	n	n	n	n	868.99	16.67496667	8										1
20	140	14	19.75673899	20	m	m	1	p	0	n	n	n	n	n	n	n	n	n	n	n	5.146	13.7227	7	1																	5.146
20	140	14	19.75673899	20	m	m	2	c	1	.	n	n	n	n	n	n	n	n	n	n	3.876	13.7227	7		1																	3.876
20	140	14	19.75673899	20	m	m	3	g	2	.	y	n	n	n	n	n	n	n	n	n	33.558	13.7227	7				1																		33.558
20	140	14	19.75673899	20	m	m	4	k	3	.	n	n	n	n	n	n	n	n	n	n	6.8	13.7227	7							1																	6.8
20	140	14	19.75673899	20	m	m	5	b	4	.	n	y	n	n	n	n	n	n	n	n	24.616	13.7227	7						1								0									24.616
20	140	14	19.75673899	20	m	m	6	k	5	.	n	n	n	n	n	n	n	n	n	n	11.288	13.7227	7							1																	11.288
20	140	14	19.75673899	20	m	m	7	d	6	.	n	n	n	n	n	n	n	y	n	n	11.594	13.7227	7								1								0	1								11.594
20	140	14	19.75673899	20	m	m	8	t		.	n	n	n	y	n	n	n	n	n	n	48.189	13.7227	7											1
20	140	14	19.75673899	20	m	m	9	t		.	n	n	n	y	n	y	y	n	n	n	124.649	13.7227	7											1
16	141		16.17357002	27	m	m	1	p	0	n	n	n	n	n	n	n	n	n	n	n	3.442	22.93148333	9	1																	3.442
16	141		16.17357002	27	m	m	2	c	1	.	n	n	n	n	n	n	n	n	n	n	5.338	22.93148333	9		1																	5.338
16	141		16.17357002	27	m	m	3	l	2	.	y	n	n	n	n	n	n	n	n	n	8.33	22.93148333	9			1																	8.33
16	141		16.17357002	27	m	m	4	g	3	.	y	n	n	n	n	n	n	n	n	n	32.436	22.93148333	9				1																		32.436
16	141		16.17357002	27	m	m	5	b	4	.	n	y	n	n	n	y	y	n	n	n	42.636	22.93148333	9						1								0									42.636
16	141		16.17357002	27	m	m	6	k	5	.	n	n	n	n	n	y	y	n	n	n	9.248	22.93148333	9							1																	9.248
16	141		16.17357002	27	m	m	7	r		.	n	n	n	n	y	n	n	n	n	n	2.38	22.93148333	9										1
16	141		16.17357002	27	m	m	8	d	6	.	n	n	n	n	y	y	n	y	n	n	10.812	22.93148333	9								1								0	1								10.812
16	141		16.17357002	27	m	m	9	r		.	n	n	n	n	y	y	n	n	n	n	55.873	22.93148333	9										1
16	141		16.17357002	27	m	m	10	r		.	n	n	n	n	y	n	n	n	n	n	15.81	22.93148333	9										1
16	141		16.17357002	27	m	m	11	d	7	.	n	n	n	n	n	n	n	y	n	n	8.67	22.93148333	9								1								0	1								8.67
16	141		16.17357002	27	m	m	12	r		.	n	n	n	n	y	n	n	n	n	n	33.048	22.93148333	9										1
16	141		16.17357002	27	m	m	13	r		.	n	n	n	n	y	n	n	n	n	n	334.39	22.93148333	9										1
16	141		16.17357002	27	m	m	14	r		.	n	n	n	n	y	n	n	n	n	n	164.39	22.93148333	9										1
16	141		16.17357002	27	m	m	15	d	8	.	n	n	n	n	y	n	n	n	y	y	29.75	22.93148333	9								1								1	0								29.75
12	142	9.166666667	12.29454306	26	m	m	1	p	0	n	n	n	n	n	n	n	n	n	n	n	2.696	3.836966667	8	1																	2.696
12	142	9.166666667	12.29454306	26	m	m	2	c	1	.	n	n	n	n	n	n	n	n	n	n	3.094	3.836966667	8		1																	3.094
12	142	9.166666667	12.29454306	26	m	m	3	l	2	.	y	n	n	n	n	n	n	n	n	n	5.984	3.836966667	8			1																	5.984
12	142	9.166666667	12.29454306	26	m	m	4	g	3	.	y	n	n	n	n	n	n	n	n	n	14.79	3.836966667	8				1																		14.79
12	142	9.166666667	12.29454306	26	m	m	5	b	4	.	n	y	y	n	n	n	n	n	n	n	7.378	3.836966667	8						1								1	1								7.378
12	142	9.166666667	12.29454306	26	m	m	6	r		.	n	n	n	n	y	n	n	n	n	n	1.471	3.836966667	8										1
12	142	9.166666667	12.29454306	26	m	m	7	k	5	.	n	n	n	n	n	n	n	n	n	n	12.818	3.836966667	8							1																	12.818
12	142	9.166666667	12.29454306	26	m	m	8	d	6	.	n	n	n	n	n	n	n	y	n	n	1.394	3.836966667	8								1								0	1								1.394
12	142	9.166666667	12.29454306	26	m	m	9	d	7	.	n	n	n	n	n	n	n	n	y	y	1.462	3.836966667	8								1								1	0								1.462
12	142	9.166666667	12.29454306	26	m	m	10	r		.	n	n	n	n	y	n	n	n	n	n	33.354	3.836966667	8										1
12	142	9.166666667	12.29454306	26	m	m	11	r		.	n	n	n	n	y	n	n	n	n	n	107.724	3.836966667	8										1
12	143	15.5	11.96581197	39	m	f	1	p	0	n	n	n	n	n	n	n	n	n	n	n	2.475	28.37221667	7	1																	2.475
12	143	15.5	11.96581197	39	m	f	2	c	1	.	n	n	n	n	n	n	n	n	n	n	5.712	28.37221667	7		1																	5.712
12	143	15.5	11.96581197	39	m	f	3	l	2	.	y	n	n	n	n	n	n	n	n	n	10.472	28.37221667	7			1																	10.472
12	143	15.5	11.96581197	39	m	f	4	g	3	.	y	n	n	n	n	n	n	n	n	n	27.506	28.37221667	7				1																		27.506
12	143	15.5	11.96581197	39	m	f	5	b	4	.	n	y	n	n	n	n	n	n	n	n	25.058	28.37221667	7						1								0									25.058
12	143	15.5	11.96581197	39	m	f	6	k	5	.	n	n	n	n	n	n	n	n	n	n	7.344	28.37221667	7							1																	7.344
12	143	15.5	11.96581197	39	m	f	7	d	6	.	n	n	n	n	n	n	n	y	n	n	10.778	28.37221667	7								1								0	1								10.778
12	143	15.5	11.96581197	39	m	f	8	r		.	n	n	n	n	y	n	n	n	n	n	8.924	28.37221667	7										1
12	143	15.5	11.96581197	39	m	f	9	r		.	n	n	n	n	y	n	n	n	n	n	23.596	28.37221667	7										1
12	143	15.5	11.96581197	39	m	f	10	r		.	n	n	n	n	y	y	y	n	n	n	30.09	28.37221667	7										1
12	143	15.5	11.96581197	39	m	f	11	t		.	n	n	n	y	n	n	n	n	n	n	15.912	28.37221667	7											1
12	143	15.5	11.96581197	39	m	f	12	t		.	n	n	n	y	n	n	n	n	n	n	7.522	28.37221667	7											1
12	143	15.5	11.96581197	39	m	f	13	r		.	n	n	n	n	y	n	n	n	n	n	159.999	28.37221667	7										1
12	143	15.5	11.96581197	39	m	f	14	r		.	n	n	n	n	y	n	n	n	n	n	170.82	28.37221667	7										1
12	143	15.5	11.96581197	39	m	f	15	t		.	n	n	n	y	n	n	n	n	n	n	9.137	28.37221667	7											1
12	143	15.5	11.96581197	39	m	f	16	t		.	n	n	n	y	n	n	n	n	n	n	27.064	28.37221667	7											1
12	143	15.5	11.96581197	39	m	f	17	r		.	n	n	n	n	y	n	n	n	n	n	75.487	28.37221667	7										1
12	143	15.5	11.96581197	39	m	f	18	r		.	n	n	n	n	y	y	n	n	n	n	151.844	28.37221667	7										1
12	143	15.5	11.96581197	39	m	f	19	m		.	n	n	n	y	n	n	n	n	n	n	84.817	28.37221667	7									1																	84.817
12	143	15.5	11.96581197	39	m	f	20	r		.	n	n	n	n	y	n	n	n	n	n	200.326	28.37221667	7										1
12	143	15.5	11.96581197	39	m	f	21	r		.	n	n	n	n	y	n	n	n	n	n	26.391	28.37221667	7										1
12	143	15.5	11.96581197	39	m	f	22	r		.	n	n	n	n	y	n	n	n	n	n	189.245	28.37221667	7										1
12	143	15.5	11.96581197	39	m	f	23	r		.	n	n	n	n	y	n	n	n	n	n	18.429	28.37221667	7										1
24	144	11	24.06311637	38	m	m	1	p	0	n	n	n	n	n	n	n	n	n	n	n	4.274	10.71185	7	1																	4.274
24	144	11	24.06311637	38	m	m	2	c	1	.	n	n	n	n	n	n	n	n	n	n	7.922	10.71185	7		1																	7.922
24	144	11	24.06311637	38	m	m	3	g	2	.	y	n	n	n	n	n	n	n	n	n	21.386	10.71185	7				1																		21.386
24	144	11	24.06311637	38	m	m	4	b	3	.	n	y	n	n	n	n	n	n	n	n	27.812	10.71185	7						1								0									27.812
24	144	11	24.06311637	38	m	m	5	r		.	n	n	n	n	y	n	n	n	n	n	4.692	10.71185	7										1
24	144	11	24.06311637	38	m	m	6	d	4	.	n	n	n	n	n	n	n	y	n	n	4.59	10.71185	7								1								0	1								4.59
24	144	11	24.06311637	38	m	m	7	k	5	.	n	n	n	n	n	n	n	n	n	n	7.548	10.71185	7							1																	7.548
24	144	11	24.06311637	38	m	m	8	r		.	n	n	n	n	y	n	n	n	n	n	98.226	10.71185	7										1
24	144	11	24.06311637	38	m	m	9	r		.	n	n	n	n	y	n	n	n	n	n	183.532	10.71185	7										1
24	144	11	24.06311637	38	m	m	10	r		.	n	n	n	n	y	n	n	n	n	n	76.95	10.71185	7										1
24	144	11	24.06311637	38	m	m	11	r		.	n	n	n	n	y	n	n	n	n	n	32.946	10.71185	7										1
24	144	11	24.06311637	38	m	m	12	d	6	.	n	n	n	n	n	n	n	y	n	n	11.526	10.71185	7								1								0	1								11.526
24	144	11	24.06311637	38	m	m	13	r		.	n	n	n	n	y	n	n	n	n	n	28.254	10.71185	7										1
24	144	11	24.06311637	38	m	m	14	r		.	n	n	n	n	y	n	n	n	n	n	72.42	10.71185	7										1
20	145	12.5	19.85535832	24	m	m	1	p	0	y	n	n	n	n	n	n	n	n	n	n	2.352	9.1351	6	1											1						2.352
20	145	12.5	19.85535832	24	m	m	2	c	1	.	n	n	n	n	n	n	n	n	n	n	2.074	9.1351	6		1																	2.074
20	145	12.5	19.85535832	24	m	m	3	g	2	.	y	n	n	n	n	n	n	n	n	n	12.886	9.1351	6				1																		12.886
20	145	12.5	19.85535832	24	m	m	4	b	3	.	n	y	y	n	n	n	n	n	n	n	16.592	9.1351	6						1								1	1								16.592
20	145	12.5	19.85535832	24	m	m	5	d	4	.	n	n	n	n	n	n	n	y	n	n	2.38	9.1351	6								1								0	1								2.38
20	145	12.5	19.85535832	24	m	m	6	r		.	n	n	n	n	y	n	n	n	n	n	19.72	9.1351	6										1
20	145	12.5	19.85535832	24	m	m	7	d	5	.	n	n	n	n	y	n	n	n	y	y	3.026	9.1351	6								1								1	0								3.026
20	145	12.5	19.85535832	24	m	m	8	r		.	n	n	n	n	y	n	n	n	n	n	443.87	9.1351	6										1
12	146	14.25	11.80144642	27	m	m	1	p	0	y	n	n	n	n	n	n	n	n	n	n	3.901	2.340933333	6	1											1						3.901
12	146	14.25	11.80144642	27	m	m	2	c	1	.	n	n	n	n	n	n	n	n	n	n	3.871	2.340933333	6		1																	3.871
12	146	14.25	11.80144642	27	m	m	3	g	2	.	y	n	n	n	n	n	n	n	n	n	16.534	2.340933333	6				1																		16.534
12	146	14.25	11.80144642	27	m	m	4	b	3	.	n	y	y	n	n	n	n	n	n	n	26.833	2.340933333	6						1								1	1								26.833
12	146	14.25	11.80144642	27	m	m	5	d	4	.	n	n	n	n	n	n	n	y	n	n	8.142	2.340933333	6								1								0	1								8.142
12	146	14.25	11.80144642	27	m	m	6	d	5	.	n	n	n	n	y	y	n	n	y	y	11.147	2.340933333	6								1								1	0								11.147
12	146	14.25	11.80144642	27	m	m	7	r		.	n	n	n	n	y	n	n	n	n	n	15.708	2.340933333	6										1
12	147	5	11.99868508	21	m	m	1	p	0	n	n	n	n	n	n	n	n	n	n	n	4.957	8.504516667	6	1																	4.957
12	147	5	11.99868508	21	m	m	2	c	1	.	n	n	n	n	n	n	n	n	n	n	8.738	8.504516667	6		1																	8.738
12	147	5	11.99868508	21	m	m	3	g	2	.	y	n	n	n	n	n	n	n	n	n	24.718	8.504516667	6				1																		24.718
12	147	5	11.99868508	21	m	m	4	b	3	.	n	y	n	n	n	y	n	n	n	n	31.586	8.504516667	6						1								0									31.586
12	147	5	11.99868508	21	m	m	5	k	4	.	n	n	n	n	n	n	n	n	n	n	16.864	8.504516667	6							1																	16.864
12	147	5	11.99868508	21	m	m	6	d	5	.	n	n	n	n	n	n	n	y	n	n	5.372	8.504516667	6								1								0	1								5.372
12	147	5	11.99868508	21	m	m	7	m		.	n	n	n	y	n	n	n	n	y	y	284.376	8.504516667	6									1																	284.376
24	148	6	23.93162393	24	m	f	1	p	0	y	n	n	n	n	n	n	n	n	n	n	2.904	2.232683333	6	1											1						2.904
24	148	6	23.93162393	24	m	f	2	c	1	.	n	n	n	n	n	n	n	n	n	n	3.462	2.232683333	6		1																	3.462
24	148	6	23.93162393	24	m	f	3	g	2	.	y	n	n	n	n	n	n	n	n	n	15.972	2.232683333	6				1																		15.972
24	148	6	23.93162393	24	m	f	4	k	3	.	n	n	n	n	n	n	n	n	n	n	19.55	2.232683333	6							1																	19.55
24	148	6	23.93162393	24	m	f	5	b	4	.	n	y	y	n	n	n	n	n	n	n	19.057	2.232683333	6						1								1	1								19.057
24	148	6	23.93162393	24	m	f	6	d	5	.	n	n	n	n	n	n	n	y	n	n	14.646	2.232683333	6								1								0	1								14.646
24	148	6	23.93162393	24	m	f	7	r		.	n	n	n	n	y	n	n	n	n	n	17.68	2.232683333	6										1
16	149	3.833333333	16.30506246	34	m	f	1	p	0	y	n	n	n	n	n	y	n	n	n	n	6.324	2.142216667	6	1											1						6.324
16	149	3.833333333	16.30506246	34	m	f	2	c	1	.	n	n	n	n	n	n	n	n	n	n	3.678	2.142216667	6		1																	3.678
16	149	3.833333333	16.30506246	34	m	f	3	g	2	.	y	n	n	n	n	n	n	n	n	n	8.942	2.142216667	6				1																		8.942
16	149	3.833333333	16.30506246	34	m	f	4	k	3	.	n	n	n	n	n	n	n	n	n	n	6.562	2.142216667	6							1																	6.562
16	149	3.833333333	16.30506246	34	m	f	5	b	4	.	n	y	n	n	n	y	n	n	n	n	16.94	2.142216667	6						1								0									16.94
16	149	3.833333333	16.30506246	34	m	f	6	d	5	.	n	n	n	n	n	n	n	y	n	n	6.562	2.142216667	6								1								0	1								6.562
16	149	3.833333333	16.30506246	34	m	f	7	r		.	n	n	n	n	y	y	n	n	n	n	10.982	2.142216667	6										1
24	150	4	23.73438527	30	m	m	1	p	0	n	n	n	n	n	n	n	n	n	n	n	4.019	18.08025	8	1																	4.019
24	150	4	23.73438527	30	m	m	2	c	1	.	n	n	n	n	n	n	n	n	n	n	2.38	18.08025	8		1																	2.38
24	150	4	23.73438527	30	m	m	3	l	2	.	y	n	n	n	n	n	n	n	n	n	2.754	18.08025	8			1																	2.754
24	150	4	23.73438527	30	m	m	4	g	3	.	y	n	n	n	n	n	n	n	n	n	19.754	18.08025	8				1																		19.754
24	150	4	23.73438527	30	m	m	5	k	4	.	n	n	n	n	n	n	n	n	n	n	11.322	18.08025	8							1																	11.322
24	150	4	23.73438527	30	m	m	6	a	5	.	n	y	y	n	n	n	n	n	n	n	8.262	18.08025	8					1								1		1						8.262
24	150	4	23.73438527	30	m	m	7	b	6	.	n	y	y	n	n	n	n	n	n	n	15.334	18.08025	8						1								1	1								15.334
24	150	4	23.73438527	30	m	m	8	d	7	.	n	n	n	n	n	n	n	y	y	y	7.82	18.08025	8								1								1	1								7.82
12	151	13.5	12.26166995	30	m	f	1	p	0	y	n	n	n	n	n	n	n	n	n	n	2.158	2.0577	6	1											1						2.158
12	151	13.5	12.26166995	30	m	f	2	c	1	.	n	n	n	n	n	n	n	n	n	n	6.63	2.0577	6		1																	6.63
12	151	13.5	12.26166995	30	m	f	3	g	2	.	y	n	n	n	n	n	n	n	n	n	13.702	2.0577	6				1																		13.702
12	151	13.5	12.26166995	30	m	f	4	b	3	.	n	y	y	n	y	n	n	n	n	n	24.684	2.0577	6						1								1	1								24.684
12	151	13.5	12.26166995	30	m	f	5	d	4	.	n	n	n	n	n	n	n	y	n	n	11.934	2.0577	6								1								0	1								11.934
12	151	13.5	12.26166995	30	m	f	6	d	5	.	n	n	n	n	n	y	n	n	y	y	6.759	2.0577	6								1								1	0								6.759
12	151	13.5	12.26166995	30	m	f	7	r		.	n	n	n	n	y	y	n	n	n	n	21.182	2.0577	6										1
24	152	11.5	23.66863905	20	m	f	1	p	0	n	n	n	n	n	n	n	n	n	n	n	3.959	10.82948333	8	1																	3.959
24	152	11.5	23.66863905	20	m	f	2	c	1	.	n	n	n	n	n	n	n	n	n	n	2.61	10.82948333	8		1																	2.61
24	152	11.5	23.66863905	20	m	f	3	g	2	.	y	n	n	n	n	n	n	n	n	n	17.061	10.82948333	8				1																		17.061
24	152	11.5	23.66863905	20	m	f	4	b	3	.	n	y	n	n	n	n	n	n	n	n	32.671	10.82948333	8						1								0									32.671
24	152	11.5	23.66863905	20	m	f	5	k	4	.	n	n	n	n	n	n	n	n	n	n	34.023	10.82948333	8							1																	34.023
24	152	11.5	23.66863905	20	m	f	6	d	5	.	n	n	n	n	n	n	n	y	n	n	9.012	10.82948333	8								1								0	1								9.012
24	152	11.5	23.66863905	20	m	f	7	r		.	n	n	n	n	y	n	n	n	n	n	7.106	10.82948333	8										1
24	152	11.5	23.66863905	20	m	f	8	r		.	n	n	n	n	y	n	n	n	n	n	133.254	10.82948333	8										1
24	152	11.5	23.66863905	20	m	f	9	d	6	.	n	n	n	n	n	n	n	y	n	n	4.39	10.82948333	8								1								0	1								4.39
24	152	11.5	23.66863905	20	m	f	10	r		.	n	n	n	n	y	n	n	n	n	n	318.516	10.82948333	8										1
24	152	11.5	23.66863905	20	m	f	11	d	7	.	n	n	n	n	y	n	n	n	y	n	7.656	10.82948333	8								1								0	0								7.656
24	152	11.5	23.66863905	20	m	f	12	r		.	n	n	n	n	y	n	n	n	n	n	2.729	10.82948333	8										1
12	153	17.25	11.86719264	25	m	f	1	p	0	n	n	n	n	n	n	n	n	n	n	n	3.504	11.70278333	7	1																	3.504
12	153	17.25	11.86719264	25	m	f	2	c	1	.	n	n	n	n	n	n	n	n	n	n	3.672	11.70278333	7		1																	3.672
12	153	17.25	11.86719264	25	m	f	3	g	2	.	y	n	n	n	n	n	n	n	n	n	15.64	11.70278333	7				1																		15.64
12	153	17.25	11.86719264	25	m	f	4	b	3	.	n	y	y	n	n	n	n	n	n	n	32.606	11.70278333	7						1								1	1								32.606
12	153	17.25	11.86719264	25	m	f	5	k	4	.	n	n	n	n	n	n	n	n	n	n	14.28	11.70278333	7							1																	14.28
12	153	17.25	11.86719264	25	m	f	6	d	5	.	n	n	n	n	n	n	n	y	n	n	6.46	11.70278333	7								1								0	1								6.46
12	153	17.25	11.86719264	25	m	f	7	d	6	.	n	n	n	n	n	n	n	n	y	y	4.726	11.70278333	7								1								1	0								4.726
12	153	17.25	11.86719264	25	m	f	8	m		.	n	n	n	y	n	n	n	n	n	n	406.282	11.70278333	7									1																	406.282
20	154	13	20.15121631	26	m	m	1	p	0	y	n	n	n	n	n	y	n	n	n	n	3.532	2.892833333	6	1											1						3.532
20	154	13	20.15121631	26	m	m	2	c	1	.	n	n	n	n	n	y	n	n	n	n	8.432	2.892833333	6		1																	8.432
20	154	13	20.15121631	26	m	m	3	g	2	.	y	n	n	n	n	y	n	n	n	n	19.278	2.892833333	6				1																		19.278
20	154	13	20.15121631	26	m	m	4	b	3	.	n	y	y	n	n	y	n	n	n	n	22.202	2.892833333	6						1								1	1								22.202
20	154	13	20.15121631	26	m	m	5	r		.	n	n	n	n	y	n	n	n	n	n	2.176	2.892833333	6										1
20	154	13	20.15121631	26	m	m	6	d	4	.	n	n	n	n	n	y	n	y	n	n	1.564	2.892833333	6								1								0	1								1.564
20	154	13	20.15121631	26	m	m	7	d	5	.	n	n	n	n	n	y	n	n	y	n	2.414	2.892833333	6								1								0	0								2.414
20	154	13	20.15121631	26	m	m	8	r		.	n	n	n	n	y	y	n	n	n	n	16.244	2.892833333	6										1
8	155		8.02103879	31	m	f	1	p	0	n	n	n	n	n	n	n	n	n	n	n	3.066	12.781	8	1																	3.066
8	155		8.02103879	31	m	f	2	c	1	.	n	n	n	n	n	n	n	n	n	n	3.876	12.781	8		1																	3.876
8	155		8.02103879	31	m	f	3	g	2	.	y	n	n	n	n	n	n	n	n	n	25.593	12.781	8				1																		25.593
8	155		8.02103879	31	m	f	4	b	3	.	n	y	y	n	n	y	n	n	n	n	21.709	12.781	8						1								1	1								21.709
8	155		8.02103879	31	m	f	5	k	4	.	n	n	n	n	n	y	n	n	n	n	3.638	12.781	8							1																	3.638
8	155		8.02103879	31	m	f	6	d	5	.	n	n	n	n	n	n	n	y	n	n	1.496	12.781	8								1								0	1								1.496
8	155		8.02103879	31	m	f	7	k	6	.	n	n	n	n	n	y	n	n	n	n	11.9	12.781	8							1																	11.9
8	155		8.02103879	31	m	f	8	m		.	n	n	n	y	n	n	n	n	y	n	248.428	12.781	8									1																	248.428
8	155		8.02103879	31	m	f	9	d	7	.	n	n	n	n	n	n	n	n	y	y	3.366	12.781	8								1								1	0								3.366
8	155		8.02103879	31	m	f	10	r		.	n	n	n	n	y	n	n	n	n	n	244.319	12.781	8										1
24	156	4	23.66863905	22	m	f	1	p	0	y	n	n	n	n	n	n	n	n	n	n	3.065	25.33883333	7	1											1						3.065
24	156	4	23.66863905	22	m	f	2	c	1	.	n	n	n	n	n	n	n	n	n	n	4.257	25.33883333	7		1																	4.257
24	156	4	23.66863905	22	m	f	3	g	2	.	y	n	n	n	n	n	n	n	n	n	18.876	25.33883333	7				1																		18.876
24	156	4	23.66863905	22	m	f	4	b	3	.	n	y	y	n	y	n	n	n	n	n	18.15	25.33883333	7						1								1	1								18.15
24	156	4	23.66863905	22	m	f	5	d	4	.	n	n	n	n	y	n	n	y	n	n	2.979	25.33883333	7								1								0	1								2.979
24	156	4	23.66863905	22	m	f	6	d	5	.	n	n	n	n	n	n	n	y	n	n	3.597	25.33883333	7								1								0	1								3.597
24	156	4	23.66863905	22	m	f	7	r		.	n	n	n	n	y	n	n	n	n	n	45.441	25.33883333	7										1
24	156	4	23.66863905	22	m	f	8	d	6	.	n	n	n	n	y	n	n	n	y	y	4.06	25.33883333	7								1								1	0								4.06
24	156	4	23.66863905	22	m	f	9	r		.	n	n	n	n	y	n	n	n	n	n	1320.387	25.33883333	7										1
12	157	13.5	11.90006575	28	g	m	1	p	0	n	n	n	n	n	n	n	n	n	n	n	5.733	11.02986667	6	1																	5.733
12	157	13.5	11.90006575	28	g	m	2	c	1	.	n	n	n	n	n	n	n	n	n	n	6.086	11.02986667	6		1																	6.086
12	157	13.5	11.90006575	28	g	m	3	g	2	.	y	n	n	n	n	n	n	n	n	n	16.694	11.02986667	6				1																		16.694
12	157	13.5	11.90006575	28	g	m	4	b	3	.	n	y	n	n	n	n	n	n	n	n	24.174	11.02986667	6						1								0									24.174
12	157	13.5	11.90006575	28	g	m	5	r		.	n	n	n	n	y	y	n	n	n	n	17.628	11.02986667	6										1
12	157	13.5	11.90006575	28	g	m	6	d	4	.	n	n	n	n	y	y	n	y	n	n	7.004	11.02986667	6								1								0	1								7.004
12	157	13.5	11.90006575	28	g	m	7	r		.	n	n	n	n	y	y	n	n	n	n	38.25	11.02986667	6										1
12	157	13.5	11.90006575	28	g	m	8	m		.	n	n	n	y	n	n	n	n	y	y	360.105	11.02986667	6									1																	360.105
12	157	13.5	11.90006575	28	g	m	9	d	5	.	n	n	n	n	n	n	n	n	y	n	8.592	11.02986667	6								1								0	0								8.592
8	158	16	8.11965812	26	m	m	1	p	0	n	n	n	n	n	n	n	n	n	n	n	6.812	27.39956667	9	1																	6.812
8	158	16	8.11965812	26	m	m	2	c	1	.	n	n	n	n	n	n	n	n	n	n	2.584	27.39956667	9		1																	2.584
8	158	16	8.11965812	26	m	m	3	l	2	.	y	n	n	n	n	n	n	n	n	n	9.554	27.39956667	9			1																	9.554
8	158	16	8.11965812	26	m	m	4	g	3	.	y	n	n	n	n	n	n	n	n	n	18.326	27.39956667	9				1																		18.326
8	158	16	8.11965812	26	m	m	5	g	4	.	y	n	n	n	n	n	n	n	n	n	24.276	27.39956667	9				1																		24.276
8	158	16	8.11965812	26	m	m	6	b	5	.	n	y	y	n	n	y	n	n	n	n	31.756	27.39956667	9						1								1	1								31.756
8	158	16	8.11965812	26	m	m	7	k	6	.	n	n	n	n	n	y	n	n	n	n	9.89	27.39956667	9							1																	9.89
8	158	16	8.11965812	26	m	m	8	d	7	.	n	n	n	n	n	y	n	y	n	n	6.493	27.39956667	9								1								0	1								6.493
8	158	16	8.11965812	26	m	m	9	d	8	.	n	n	n	n	n	n	n	n	y	y	3.366	27.39956667	9								1								1	0								3.366
8	158	16	8.11965812	26	m	m	10	m		.	n	n	n	y	n	n	n	n	n	n	703.369	27.39956667	9									1																	703.369
8	158	16	8.11965812	26	m	m	11	r		.	n	n	n	n	y	n	n	n	n	n	11.755	27.39956667	9										1
8	158	16	8.11965812	26	m	m	12	m		.	n	n	n	y	n	n	n	n	n	n	687.604	27.39956667	9									1																	687.604
8	158	16	8.11965812	26	m	m	13	r		.	n	n	n	n	y	n	n	n	n	n	12.92	27.39956667	9										1
16	160		15.87771203	20	m	m	1	p	0	n	n	n	n	n	n	n	n	n	n	n	2.17	20.7582	5	1																	2.17
16	160		15.87771203	20	m	m	2	c	1	.	n	n	n	n	n	n	n	n	n	n	7.924	20.7582	5		1																	7.924
16	160		15.87771203	20	m	m	3	g	2	.	y	n	n	n	n	n	n	n	n	n	29.987	20.7582	5				1																		29.987
16	160		15.87771203	20	m	m	4	b	3	.	n	y	y	n	y	y	n	n	n	n	27.995	20.7582	5						1								1	1								27.995
16	160		15.87771203	20	m	m	5	d	4	.	n	n	n	n	n	y	n	y	y	y	10.987	20.7582	5								1								1	1								10.987
16	160		15.87771203	20	m	m	6	m		.	n	n	n	y	n	n	n	n	n	n	231.956	20.7582	5									1																	231.956
16	160		15.87771203	20	m	m	7	r		.	n	n	n	n	y	n	n	n	n	n	471.475	20.7582	5										1
16	160		15.87771203	20	m	m	8	m		.	n	n	n	y	n	n	n	n	n	n	99.077	20.7582	5									1																	99.077
16	160		15.87771203	20	m	m	9	r		.	n	n	n	n	y	n	n	n	n	n	322.564	20.7582	5										1
16	161	14.83333333	15.84483892	22	m	m	1	p	0	n	n	n	n	n	n	y	n	n	n	n	4.303	2.342766667	5	1																	4.303
16	161	14.83333333	15.84483892	22	m	m	2	c	1	.	n	n	n	n	n	y	n	n	n	n	6.124	2.342766667	5		1																	6.124
16	161	14.83333333	15.84483892	22	m	m	3	g	2	.	y	n	n	n	y	y	n	n	n	n	30.158	2.342766667	5				1																		30.158
16	161	14.83333333	15.84483892	22	m	m	4	b	3	.	n	y	y	n	y	y	n	n	n	n	29.92	2.342766667	5						1								1	1								29.92
16	161	14.83333333	15.84483892	22	m	m	5	r		.	n	n	n	n	y	y	n	n	n	n	3.74	2.342766667	5										1
16	161	14.83333333	15.84483892	22	m	m	6	d	4	.	n	n	n	n	y	y	n	y	n	n	3.74	2.342766667	5								1								0	1								3.74
16	161	14.83333333	15.84483892	22	m	m	7	r		.	n	n	n	n	y	y	n	n	n	n	13.281	2.342766667	5										1
20	162		20.08547009	26	m	f	1	p	0	n	n	n	n	n	n	n	n	n	n	n	3.227	10.85308333	7	1																	3.227
20	162		20.08547009	26	m	f	2	c	1	.	n	n	n	n	n	n	n	n	n	n	4.381	10.85308333	7		1																	4.381
20	162		20.08547009	26	m	f	3	g	2	.	y	n	n	n	n	n	n	n	n	n	18.806	10.85308333	7				1																		18.806
20	162		20.08547009	26	m	f	4	b	3	.	n	y	n	n	y	n	n	n	n	n	19.54	10.85308333	7						1								0									19.54
20	162		20.08547009	26	m	f	5	k	4	.	n	n	n	n	n	n	n	n	n	n	10.666	10.85308333	7							1																	10.666
20	162		20.08547009	26	m	f	6	d	5	.	n	n	n	n	y	n	n	y	n	n	17.196	10.85308333	7								1								0	1								17.196
20	162		20.08547009	26	m	f	7	r		.	n	n	n	n	y	n	n	n	n	n	348.942	10.85308333	7										1
20	162		20.08547009	26	m	f	8	d	6	.	n	n	n	n	n	n	n	n	y	y	11.392	10.85308333	7								1								1	0								11.392
20	162		20.08547009	26	m	f	9	r		.	n	n	n	n	y	n	n	n	n	n	19.765	10.85308333	7										1
16	163	3	15.91058514	24	m	m	1	p	0	n	n	n	n	n	n	n	n	n	n	n	2.438	2.623516667	5	1																	2.438
16	163	3	15.91058514	24	m	m	2	c	1	.	n	n	n	n	n	n	n	n	n	n	5.236	2.623516667	5		1																	5.236
16	163	3	15.91058514	24	m	m	3	g	2	.	y	n	n	n	n	n	n	n	n	n	12.614	2.623516667	5				1																		12.614
16	163	3	15.91058514	24	m	m	4	b	3	.	n	y	n	n	n	n	n	n	n	n	17.408	2.623516667	5						1								0									17.408
16	163	3	15.91058514	24	m	m	5	d	4	.	n	n	n	n	n	n	n	y	n	n	8.704	2.623516667	5								1								0	1								8.704
16	163	3	15.91058514	24	m	m	6	r		.	n	n	n	n	y	n	n	n	n	n	8.67	2.623516667	5										1
16	163	3	15.91058514	24	m	m	7	m		.	n	n	n	y	y	n	n	n	y	y	37.06	2.623516667	5									1																	37.06
20	164	11.16666667	19.88823143	22	m	f	1	p	0	y	n	n	n	n	n	y	n	n	n	n	2.353	17.63576667	6	1											1						2.353
20	164	11.16666667	19.88823143	22	m	f	2	c	1	.	n	n	n	n	n	n	n	n	n	n	1.61	17.63576667	6		1																	1.61
20	164	11.16666667	19.88823143	22	m	f	3	g	2	.	y	n	n	n	n	n	n	n	n	n	14.552	17.63576667	6				1																		14.552
20	164	11.16666667	19.88823143	22	m	f	4	b	3	.	n	y	y	n	n	n	n	n	n	n	21.08	17.63576667	6						1								1	1								21.08
20	164	11.16666667	19.88823143	22	m	f	5	d	4	.	n	n	n	n	n	n	n	y	n	n	5.78	17.63576667	6								1								0	1								5.78
20	164	11.16666667	19.88823143	22	m	f	6	r		.	n	n	n	n	y	n	n	n	n	n	9.996	17.63576667	6										1
20	164	11.16666667	19.88823143	22	m	f	7	d	5	.	n	n	n	n	y	n	n	n	y	y	3.073	17.63576667	6								1								1	0								3.073
20	164	11.16666667	19.88823143	22	m	f	8	r		.	n	n	n	n	y	n	n	n	n	n	553.652	17.63576667	6										1
12	165	8	11.93293886	25	m	f	1	p	0	n	n	n	n	n	n	n	n	n	n	n	2.694	12.56183333	7	1																	2.694
12	165	8	11.93293886	25	m	f	2	c	1	.	n	n	n	n	n	n	n	n	n	n	3.196	12.56183333	7		1																	3.196
12	165	8	11.93293886	25	m	f	3	l	2	.	y	n	n	n	n	n	n	n	n	n	7.514	12.56183333	7			1																	7.514
12	165	8	11.93293886	25	m	f	4	g	3	.	y	n	n	n	n	n	n	n	n	n	20.298	12.56183333	7				1																		20.298
12	165	8	11.93293886	25	m	f	5	b	4	.	n	y	y	n	n	n	n	n	n	n	16.762	12.56183333	7						1								1	1								16.762
12	165	8	11.93293886	25	m	f	6	k	5	.	n	n	n	n	n	n	n	n	n	n	13.022	12.56183333	7							1																	13.022
12	165	8	11.93293886	25	m	f	7	d	6	.	n	n	n	n	n	n	n	y	n	n	5.304	12.56183333	7								1								0	1								5.304
12	165	8	11.93293886	25	m	f	8	r		.	n	n	n	n	y	n	n	n	n	n	54.205	12.56183333	7										1
12	165	8	11.93293886	25	m	f	9	m		.	n	n	n	y	n	n	n	n	n	n	110.432	12.56183333	7									1																	110.432
12	165	8	11.93293886	25	m	f	10	r		.	n	n	n	n	y	n	n	n	n	n	335.158	12.56183333	7										1
12	165	8	11.93293886	25	m	f	11	r		.	n	n	n	n	y	n	n	n	n	n	77.908	12.56183333	7										1
12	165	8	11.93293886	25	m	f	12	r		.	n	n	n	n	y	n	n	n	n	n	13.165	12.56183333	7										1
12	165	8	11.93293886	25	m	f	13	r		.	n	n	n	n	y	n	n	n	n	n	21.826	12.56183333	7										1
12	166	7	12.0644313	21	m	f	1	p	0	n	n	n	n	n	n	n	n	n	n	n	3.725	8.280183333	8	1																	3.725
12	166	7	12.0644313	21	m	f	2	c	1	.	n	n	n	n	n	n	n	n	n	n	7.48	8.280183333	8		1																	7.48
12	166	7	12.0644313	21	m	f	3	l	2	.	y	n	n	n	n	n	n	n	n	n	13.906	8.280183333	8			1																	13.906
12	166	7	12.0644313	21	m	f	4	g	3	.	y	n	n	n	n	n	n	n	n	n	24.922	8.280183333	8				1																		24.922
12	166	7	12.0644313	21	m	f	5	b	4	.	n	y	y	n	y	n	n	n	n	n	28.084	8.280183333	8						1								1	1								28.084
12	166	7	12.0644313	21	m	f	6	k	5	.	n	n	n	n	y	n	n	n	n	n	24.004	8.280183333	8							1																	24.004
12	166	7	12.0644313	21	m	f	7	r		.	n	n	n	n	y	n	n	n	n	n	5.44	8.280183333	8										1
12	166	7	12.0644313	21	m	f	8	d	6	.	n	n	n	n	y	n	n	n	y	y	3.536	8.280183333	8								1								1	0								3.536
12	166	7	12.0644313	21	m	f	9	d	7	.	n	n	n	n	y	n	n	y	n	n	7.752	8.280183333	8								1								0	1								7.752
12	166	7	12.0644313	21	m	f	10	r		.	n	n	n	n	y	n	n	n	n	n	278.188	8.280183333	8										1
20	167	12.5	20.15121631	32	m	m	1	p	0	n	n	n	n	n	n	n	n	n	n	n	2.074	8.831833333	7	1																	2.074
20	167	12.5	20.15121631	32	m	m	2	c	1	.	n	n	n	n	n	n	n	n	n	n	3.332	8.831833333	7		1																	3.332
20	167	12.5	20.15121631	32	m	m	3	g	2	.	y	n	n	n	n	n	n	n	n	n	15.674	8.831833333	7				1																		15.674
20	167	12.5	20.15121631	32	m	m	4	b	3	.	n	y	y	n	n	n	n	n	n	n	13.43	8.831833333	7						1								1	1								13.43
20	167	12.5	20.15121631	32	m	m	5	k	4	.	n	n	n	n	n	n	n	n	n	n	18.224	8.831833333	7							1																	18.224
20	167	12.5	20.15121631	32	m	m	6	d	5	.	n	n	n	n	n	n	n	y	n	n	5.44	8.831833333	7								1								0	1								5.44
20	167	12.5	20.15121631	32	m	m	7	r		.	n	n	n	n	y	n	n	n	n	n	4.08	8.831833333	7										1
20	167	12.5	20.15121631	32	m	m	8	d	6	.	n	n	n	n	y	n	n	n	y	y	3.672	8.831833333	7								1								1	0								3.672
20	167	12.5	20.15121631	32	m	m	9	r		.	n	n	n	n	y	n	n	n	n	n	382.772	8.831833333	7										1
20	167	12.5	20.15121631	32	m	m	10	r		.	n	n	n	n	y	n	n	n	n	n	15.68	8.831833333	7										1
20	167	12.5	20.15121631	32	m	m	11	r		.	n	n	n	n	y	n	n	n	n	n	12.357	8.831833333	7										1
8	168	14.5	8.218277449	19	m	m	1	p	0	n	n	n	n	n	n	n	n	n	n	n	3.101	12.9854	7	1																	3.101
8	168	14.5	8.218277449	19	m	m	2	c	1	.	n	n	n	n	n	n	n	n	n	n	6.936	12.9854	7		1																	6.936
8	168	14.5	8.218277449	19	m	m	3	l	2	.	y	n	n	n	n	n	n	n	n	n	5.508	12.9854	7			1																	5.508
8	168	14.5	8.218277449	19	m	m	4	g	3	.	y	n	n	n	n	n	n	n	n	n	17.714	12.9854	7				1																		17.714
8	168	14.5	8.218277449	19	m	m	5	b	4	.	n	y	y	n	n	n	n	n	n	n	30.158	12.9854	7						1								1	1								30.158
8	168	14.5	8.218277449	19	m	m	6	k	5	.	n	n	n	n	n	y	n	n	n	n	6.63	12.9854	7							1																	6.63
8	168	14.5	8.218277449	19	m	m	7	r		.	n	n	n	n	y	y	n	n	n	n	33.701	12.9854	7										1
8	168	14.5	8.218277449	19	m	m	8	t		.	n	n	n	y	n	y	n	n	n	n	34.187	12.9854	7											1
8	168	14.5	8.218277449	19	m	m	9	d	6	.	n	n	n	n	n	y	n	y	n	n	4.284	12.9854	7								1								0	1								4.284
8	168	14.5	8.218277449	19	m	m	10	t		.	n	n	n	y	n	y	n	n	n	n	15.674	12.9854	7											1
8	168	14.5	8.218277449	19	m	m	11	m		.	n	n	n	y	n	y	n	n	n	n	24.133	12.9854	7									1																	24.133
8	168	14.5	8.218277449	19	m	m	12	r		.	n	n	n	n	y	y	n	n	n	n	8.16	12.9854	7										1
8	168	14.5	8.218277449	19	m	m	13	r		.	n	n	n	n	y	y	n	n	n	n	3.999	12.9854	7										1
8	168	14.5	8.218277449	19	m	m	14	m		.	n	n	n	y	n	n	n	n	n	n	166.932	12.9854	7									1																	166.932
8	168	14.5	8.218277449	19	m	m	15	r		.	n	n	n	n	y	y	n	n	n	n	73.221	12.9854	7										1
16	170	14.5	16.17357002	23	m	m	1	p	0	n	n	n	n	n	n	y	n	n	n	n	3.128	17.64561667	7	1																	3.128
16	170	14.5	16.17357002	23	m	m	2	c	1	.	n	n	n	n	n	n	n	n	n	n	10.064	17.64561667	7		1																	10.064
16	170	14.5	16.17357002	23	m	m	3	g	2	.	y	n	n	n	n	y	n	n	n	n	20.4	17.64561667	7				1																		20.4
16	170	14.5	16.17357002	23	m	m	4	b	3	.	n	y	n	n	n	y	n	n	n	n	17.78	17.64561667	7						1								0									17.78
16	170	14.5	16.17357002	23	m	m	5	k	4	.	n	n	n	n	n	n	n	n	n	n	21.252	17.64561667	7							1																	21.252
16	170	14.5	16.17357002	23	m	m	6	d	5	.	n	n	n	n	n	n	n	y	n	n	7.412	17.64561667	7								1								0	1								7.412
16	170	14.5	16.17357002	23	m	m	7	t		.	n	n	n	y	n	n	n	n	n	n	18.904	17.64561667	7											1
16	170	14.5	16.17357002	23	m	m	8	d	6	.	n	n	n	y	n	n	n	y	n	n	7.004	17.64561667	7								1								0	1								7.004
16	170	14.5	16.17357002	23	m	m	9	t		.	n	n	n	y	n	n	n	n	n	n	257.686	17.64561667	7											1
12	172	17	11.66995398	26	m	f	1	p	0	n	n	n	n	n	n	y	n	n	n	n	4.802	7.691183333	6	1																	4.802
12	172	17	11.66995398	26	m	f	2	c	1	.	n	n	n	n	n	n	n	n	n	n	5.066	7.691183333	6		1																	5.066
12	172	17	11.66995398	26	m	f	3	g	2	.	y	n	n	n	n	n	n	n	n	n	34.374	7.691183333	6				1																		34.374
12	172	17	11.66995398	26	m	f	4	b	3	.	n	y	n	n	n	n	n	n	n	n	27.506	7.691183333	6						1								0									27.506
12	172	17	11.66995398	26	m	f	5	k	4	.	n	n	n	n	n	n	n	n	n	n	12.478	7.691183333	6							1																	12.478
12	172	17	11.66995398	26	m	f	6	d	5	.	n	n	n	n	n	n	n	y	n	n	5.848	7.691183333	6								1								0	1								5.848
12	172	17	11.66995398	26	m	f	7	m		.	n	n	n	y	n	n	n	n	y	y	212.423	7.691183333	6									1																	212.423
20	173	12.5	19.98685076		m	f	1	p	0	n	n	n	n	n	n	n	n	n	n	n	3.121	9.849183333	6	1																	3.121
20	173	12.5	19.98685076		m	f	2	c	1	.	n	n	n	n	n	n	n	n	n	n	3.196	9.849183333	6		1																	3.196
20	173	12.5	19.98685076		m	f	3	g	2	.	y	n	n	n	n	n	n	n	n	n	14.11	9.849183333	6				1																		14.11
20	173	12.5	19.98685076		m	f	4	b	3	.	n	y	n	n	n	n	n	n	n	n	17.714	9.849183333	6						1								0									17.714
20	173	12.5	19.98685076		m	f	5	k	4	.	n	n	n	n	n	n	n	n	n	n	16.354	9.849183333	6							1																	16.354
20	173	12.5	19.98685076		m	f	6	d	5	.	n	n	n	n	n	n	n	y	n	n	7.922	9.849183333	6								1								0	1								7.922
12	174	17	11.76857331	31	m	m	1	p	0	y	n	n	n	n	n	n	n	n	n	n	2.291	21.10916667	6	1											1						2.291
12	174	17	11.76857331	31	m	m	2	c	1	.	n	n	n	n	n	n	n	n	n	n	3.332	21.10916667	6		1																	3.332
12	174	17	11.76857331	31	m	m	3	g	2	.	y	n	n	n	n	n	n	n	n	n	18.156	21.10916667	6				1																		18.156
12	174	17	11.76857331	31	m	m	4	b	3	.	n	y	y	n	n	y	n	n	n	n	15.912	21.10916667	6						1								1	1								15.912
12	174	17	11.76857331	31	m	m	5	d	4	.	n	n	n	n	n	n	n	y	n	n	3.264	21.10916667	6								1								0	1								3.264
12	174	17	11.76857331	31	m	m	6	m		.	n	n	n	y	n	n	n	n	n	n	1153.068	21.10916667	6									1																	1153.068
12	174	17	11.76857331	31	m	m	7	d	5	.	n	n	n	n	n	n	n	n	y	y	2.142	21.10916667	6								1								1	0								2.142
12	174	17	11.76857331	31	m	m	8	r		.	n	n	n	n	y	n	n	n	n	n	6.528	21.10916667	6										1
12	175	14.91666667	11.80144642	23	m	m	1	p	0	n	n	n	n	n	n	n	n	n	n	n	4.835	8.679533333	8	1																	4.835
12	175	14.91666667	11.80144642	23	m	m	2	c	1	.	n	n	n	n	n	n	n	n	n	n	2.176	8.679533333	8		1																	2.176
12	175	14.91666667	11.80144642	23	m	m	3	l	2	.	y	n	n	n	n	n	n	n	n	n	13.362	8.679533333	8			1																	13.362
12	175	14.91666667	11.80144642	23	m	m	4	g	3	.	y	n	n	n	n	n	n	n	n	n	28.186	8.679533333	8				1																		28.186
12	175	14.91666667	11.80144642	23	m	m	5	b	4	.	n	y	y	n	y	n	n	n	n	n	27.778	8.679533333	8						1								1	1								27.778
12	175	14.91666667	11.80144642	23	m	m	6	k	5	.	n	n	n	n	y	n	n	n	n	n	8.874	8.679533333	8							1																	8.874
12	175	14.91666667	11.80144642	23	m	m	7	d	6	.	n	n	n	n	n	n	n	y	n	n	5.066	8.679533333	8								1								0	1								5.066
12	175	14.91666667	11.80144642	23	m	m	8	t		.	n	n	n	y	n	n	n	n	n	n	18.871	8.679533333	8											1
12	175	14.91666667	11.80144642	23	m	m	9	t		.	n	n	n	y	y	n	n	n	n	n	33.622	8.679533333	8											1
12	175	14.91666667	11.80144642	23	m	m	10	r		.	n	n	n	n	y	n	n	n	n	n	12.022	8.679533333	8										1
12	175	14.91666667	11.80144642	23	m	m	11	r		.	n	n	n	n	y	n	n	n	n	n	28.487	8.679533333	8										1
12	175	14.91666667	11.80144642	23	m	m	12	d	7	.	n	n	n	n	y	n	n	n	y	y	10.298	8.679533333	8								1								1	0								10.298
12	175	14.91666667	11.80144642	23	m	m	13	m		.	n	n	n	y	n	n	n	n	n	n	107.992	8.679533333	8									1																	107.992
12	175	14.91666667	11.80144642	23	m	m	14	r		.	n	n	n	n	y	n	n	n	n	n	18.417	8.679533333	8										1
24	176	5	23.80013149	27	m	m	1	p	0	n	n	n	n	n	n	n	n	n	n	n	6.356	10.11708333	7	1																	6.356
24	176	5	23.80013149	27	m	m	2	c	1	.	n	n	n	n	n	n	n	n	n	n	4.59	10.11708333	7		1																	4.59
24	176	5	23.80013149	27	m	m	3	l	2	.	y	n	n	n	n	n	n	n	n	n	5.227	10.11708333	7			1																	5.227
24	176	5	23.80013149	27	m	m	4	g	3	.	y	n	n	n	n	n	n	n	n	n	24.922	10.11708333	7				1																		24.922
24	176	5	23.80013149	27	m	m	5	k	4	.	n	n	n	n	n	n	n	n	n	n	9.323	10.11708333	7							1																	9.323
24	176	5	23.80013149	27	m	m	6	b	5	.	n	y	n	n	y	n	n	n	n	n	29.138	10.11708333	7						1								0									29.138
24	176	5	23.80013149	27	m	m	7	r		.	n	n	n	n	y	n	n	n	n	n	5.761	10.11708333	7										1
24	176	5	23.80013149	27	m	m	8	d	6	.	n	n	n	n	y	n	n	y	n	n	7.242	10.11708333	7								1								0	1								7.242
24	176	5	23.80013149	27	m	m	9	r		.	n	n	n	n	y	n	n	n	n	n	495.724	10.11708333	7										1
20	177	14.5	20.18408941	26	m	m	1	p	0	n	n	n	n	n	n	n	n	n	n	n	3.376	17.1257	7	1																	3.376
20	177	14.5	20.18408941	26	m	m	2	c	1	.	n	n	n	n	n	n	n	n	n	n	7.038	17.1257	7		1																	7.038
20	177	14.5	20.18408941	26	m	m	3	g	2	.	y	n	n	n	n	n	n	n	n	n	12.036	17.1257	7				1																		12.036
20	177	14.5	20.18408941	26	m	m	4	b	3	.	n	y	y	n	n	n	n	n	n	n	24.038	17.1257	7						1								1	1								24.038
20	177	14.5	20.18408941	26	m	m	5	d	4	.	n	n	n	n	n	n	n	y	n	n	6.936	17.1257	7								1								0	1								6.936
20	177	14.5	20.18408941	26	m	m	6	r		.	n	n	n	n	y	y	n	n	n	n	33.15	17.1257	7										1
20	177	14.5	20.18408941	26	m	m	7	r		.	n	n	n	n	y	n	n	n	n	n	486.277	17.1257	7										1
20	177	14.5	20.18408941	26	m	m	8	d	5	.	n	n	n	n	n	n	n	n	y	n	3.4	17.1257	7								1								0	0								3.4
20	177	14.5	20.18408941	26	m	m	9	r		.	n	n	n	n	y	n	n	n	n	n	87.472	17.1257	7										1
20	177	14.5	20.18408941	26	m	m	10	d	6	.	n	n	n	n	n	n	n	n	y	n	9.315	17.1257	7								1								0	0								9.315
24	178	4	24.32610125	31	m	f	1	p	0	y	n	n	n	n	n	n	n	n	n	n	3.779	9.407233333	6	1											1						3.779
24	178	4	24.32610125	31	m	f	2	c	1	.	n	n	n	n	n	n	n	n	n	n	7.722	9.407233333	6		1																	7.722
24	178	4	24.32610125	31	m	f	3	l	2	.	y	n	n	n	n	n	n	n	n	n	9.248	9.407233333	6			1																	9.248
24	178	4	24.32610125	31	m	f	4	g	3	.	y	n	n	n	n	n	n	n	n	n	15.606	9.407233333	6				1																		15.606
24	178	4	24.32610125	31	m	f	5	b	4	.	n	y	y	n	n	n	n	n	n	n	42.21	9.407233333	6						1								1	1								42.21
24	178	4	24.32610125	31	m	f	6	d	5	.	n	n	n	n	n	n	n	y	y	y	8.602	9.407233333	6								1								1	1								8.602
24	178	4	24.32610125	31	m	f	7	r		.	n	n	n	n	y	y	n	n	n	n	361.205	9.407233333	6										1
16	179	14.5	15.97633136	25	g	f	1	p	0	n	n	n	n	n	n	n	n	n	n	n	3.057	12.96693333	8	1																	3.057
16	179	14.5	15.97633136	25	g	f	2	c	1	.	n	n	n	n	n	n	n	n	n	n	6.29	12.96693333	8		1																	6.29
16	179	14.5	15.97633136	25	g	f	3	l	2	.	y	n	n	n	n	n	n	n	n	n	4.828	12.96693333	8			1																	4.828
16	179	14.5	15.97633136	25	g	f	4	g	3	.	y	n	n	n	n	n	n	n	n	n	11.628	12.96693333	8				1																		11.628
16	179	14.5	15.97633136	25	g	f	5	b	4	.	n	y	y	n	n	n	n	n	n	n	14.959	12.96693333	8						1								1	1								14.959
16	179	14.5	15.97633136	25	g	f	6	k	5	.	n	n	n	n	n	n	n	n	n	n	7.888	12.96693333	8							1																	7.888
16	179	14.5	15.97633136	25	g	f	7	d	6	.	n	n	n	n	n	n	n	y	n	n	3.468	12.96693333	8								1								0	1								3.468
16	179	14.5	15.97633136	25	g	f	8	r		.	n	n	n	n	y	n	n	n	n	n	35.994	12.96693333	8										1
16	179	14.5	15.97633136	25	g	f	9	t		.	n	n	n	y	y	n	n	n	n	n	565.93	12.96693333	8											1
16	179	14.5	15.97633136	25	g	f	10	r		.	n	n	n	n	y	y	n	n	n	n	51.465	12.96693333	8										1
16	179	14.5	15.97633136	25	g	f	11	d	7	.	n	n	n	n	n	n	n	n	y	y	1.87	12.96693333	8								1								1	0								1.87
8	180	16.5	7.823800131	27	m	f	1	p	0	n	n	n	n	n	n	n	n	n	n	n	3.42	9.1754	7	1																	3.42
8	180	16.5	7.823800131	27	m	f	2	c	1	.	n	n	n	n	n	n	n	n	n	n	5.406	9.1754	7		1																	5.406
8	180	16.5	7.823800131	27	m	f	3	g	2	.	y	n	n	n	n	n	n	n	n	n	20.026	9.1754	7				1																		20.026
8	180	16.5	7.823800131	27	m	f	4	b	3	.	n	y	y	n	n	n	n	n	n	n	21.461	9.1754	7						1								1	1								21.461
8	180	16.5	7.823800131	27	m	f	5	k	4	.	n	n	n	n	n	n	n	n	n	n	11.526	9.1754	7							1																	11.526
8	180	16.5	7.823800131	27	m	f	6	d	5	.	n	n	n	n	n	n	n	y	n	n	2.55	9.1754	7								1								0	1								2.55
8	180	16.5	7.823800131	27	m	f	7	r		.	n	n	n	n	y	n	n	n	n	n	3.026	9.1754	7										1
8	180	16.5	7.823800131	27	m	f	8	r		.	n	n	n	n	y	n	n	n	n	n	2.278	9.1754	7										1
8	180	16.5	7.823800131	27	m	f	9	d	6	.	n	n	n	n	y	n	n	n	y	y	2.448	9.1754	7								1								1	0								2.448
8	180	16.5	7.823800131	27	m	f	10	r		.	n	n	n	n	y	n	n	n	n	n	110.364	9.1754	7										1
8	180	16.5	7.823800131	27	m	f	11	r		.	n	n	n	n	y	n	n	n	n	n	15.028	9.1754	7										1
16	181	4	16.17357002	29	m	m	1	p	0	n	n	n	n	n	n	n	n	n	n	n	3.717	8.052266667	5	1																	3.717
16	181	4	16.17357002	29	m	m	2	c	1	.	n	n	n	n	n	n	n	n	n	n	11.798	8.052266667	5		1																	11.798
16	181	4	16.17357002	29	m	m	3	g	2	.	y	n	n	n	n	n	n	n	n	n	17.102	8.052266667	5				1																		17.102
16	181	4	16.17357002	29	m	m	4	b	3	.	n	y	y	n	y	n	n	n	n	n	30.09	8.052266667	5						1								1	1								30.09
16	181	4	16.17357002	29	m	m	5	d	4	.	n	n	n	n	n	n	n	y	n	n	8.976	8.052266667	5								1								0	1								8.976
16	181	4	16.17357002	29	m	m	6	r		.	n	n	n	n	y	y	n	n	n	n	155.337	8.052266667	5										1
24	182		23.76725838	24	m	m	1	p	0	y	n	n	n	n	n	n	n	n	n	n	3.591	11.14951667	8	1											1						3.591
24	182		23.76725838	24	m	m	2	c	1	.	n	n	n	n	n	n	n	n	n	n	6.732	11.14951667	8		1																	6.732
24	182		23.76725838	24	m	m	3	l	2	.	y	n	n	n	n	n	n	n	n	n	4.998	11.14951667	8			1																	4.998
24	182		23.76725838	24	m	m	4	g	3	.	y	n	n	n	n	n	n	n	n	n	15.3	11.14951667	8				1																		15.3
24	182		23.76725838	24	m	m	5	a	4	.	n	y	n	n	n	n	n	n	n	n	6.29	11.14951667	8					1								0								6.29
24	182		23.76725838	24	m	m	6	b	5	.	n	y	n	n	n	n	n	n	n	n	12.75	11.14951667	8						1								0									12.75
24	182		23.76725838	24	m	m	7	k	6	.	n	n	n	n	n	n	n	n	n	n	8.262	11.14951667	8							1																	8.262
24	182		23.76725838	24	m	m	8	d	7	.	n	n	n	n	n	n	n	y	n	n	4.896	11.14951667	8								1								0	1								4.896
24	182		23.76725838	24	m	m	9	r		.	n	n	n	n	y	n	n	n	n	n	8.568	11.14951667	8										1
24	182		23.76725838	24	m	m	10	r		.	n	n	n	n	y	n	n	n	n	n	12.886	11.14951667	8										1
24	182		23.76725838	24	m	m	11	r		.	n	n	n	n	y	n	n	n	n	n	43.796	11.14951667	8										1
24	182		23.76725838	24	m	m	12	r		.	n	n	n	n	y	n	n	n	n	n	125.392	11.14951667	8										1
24	182		23.76725838	24	m	m	13	r		.	n	n	n	n	y	n	n	n	n	n	59.194	11.14951667	8										1
24	182		23.76725838	24	m	m	14	r		.	n	n	n	n	y	n	n	n	n	n	7.099	11.14951667	8										1
16	183	14	15.7790927	24	m	f	1	p	0	n	n	n	n	n	n	n	n	n	n	n	4.063	26.6574	8	1																	4.063
16	183	14	15.7790927	24	m	f	2	c	1	.	n	n	n	n	n	n	n	n	n	n	3.502	26.6574	8		1																	3.502
16	183	14	15.7790927	24	m	f	3	l	2	.	y	n	n	n	n	n	n	n	n	n	5.371	26.6574	8			1																	5.371
16	183	14	15.7790927	24	m	f	4	g	3	.	y	n	n	n	n	n	n	n	n	n	10.982	26.6574	8				1																		10.982
16	183	14	15.7790927	24	m	f	5	b	4	.	n	y	y	n	n	n	n	n	n	n	13.09	26.6574	8						1								1	1								13.09
16	183	14	15.7790927	24	m	f	6	k	5	.	n	n	n	n	n	n	n	n	n	n	10.472	26.6574	8							1																	10.472
16	183	14	15.7790927	24	m	f	7	d	6	.	n	n	n	n	n	n	n	y	n	n	6.12	26.6574	8								1								0	1								6.12
16	183	14	15.7790927	24	m	f	8	m		.	n	n	n	y	n	n	n	n	y	y	173.978	26.6574	8									1																	173.978
16	183	14	15.7790927	24	m	f	9	r		.	n	n	n	n	y	n	n	n	n	n	7.598	26.6574	8										1
16	183	14	15.7790927	24	m	f	10	t		.	n	n	n	y	y	n	n	n	n	n	115.077	26.6574	8											1
16	183	14	15.7790927	24	m	f	11	r		.	n	n	n	n	y	n	n	n	n	n	15.74	26.6574	8										1
16	183	14	15.7790927	24	m	f	12	d	7	.	n	n	n	n	y	n	n	n	y	n	2.391	26.6574	8								1								0	0								2.391
16	183	14	15.7790927	24	m	f	13	r		.	n	n	n	n	y	n	n	n	n	n	297.024	26.6574	8										1
16	183	14	15.7790927	24	m	f	14	r		.	n	n	n	n	y	n	n	n	n	n	805.59	26.6574	8										1
12	184	14.5	11.86719264	35	m	f	1	p	0	n	n	n	n	n	n	n	n	n	n	n	3.688	13.39043333	7	1																	3.688
12	184	14.5	11.86719264	35	m	f	2	c	1	n	n	n	n	n	n	n	n	n	n	n	4.726	13.39043333	7		1																	4.726
12	184	14.5	11.86719264	35	m	f	3	g	2	.	y	n	n	n	n	n	n	n	n	n	12.614	13.39043333	7				1																		12.614
12	184	14.5	11.86719264	35	m	f	4	b	3	.	n	y	n	n	n	n	n	n	n	n	24.14	13.39043333	7						1								0									24.14
12	184	14.5	11.86719264	35	m	f	5	r		.	n	n	n	n	y	n	n	n	n	n	4.93	13.39043333	7										1
12	184	14.5	11.86719264	35	m	f	6	d	4	.	n	n	n	n	n	n	n	y	n	n	7.242	13.39043333	7								1								0	1								7.242
12	184	14.5	11.86719264	35	m	f	7	d	5	.	n	n	n	n	y	n	n	n	y	y	1.564	13.39043333	7								1								1	0								1.564
12	184	14.5	11.86719264	35	m	f	8	m		.	n	n	n	y	n	n	n	n	n	n	184.687	13.39043333	7									1																	184.687
12	184	14.5	11.86719264	35	m	f	9	r		.	n	n	n	n	y	n	n	n	n	n	11.094	13.39043333	7										1
12	184	14.5	11.86719264	35	m	f	10	r		.	n	n	n	n	y	n	n	n	n	n	390.422	13.39043333	7										1
12	184	14.5	11.86719264	35	m	f	11	r		.	n	n	n	n	y	n	n	n	n	n	11.152	13.39043333	7										1
12	184	14.5	11.86719264	35	m	f	12	d	6	.	n	n	n	n	n	n	n	n	y	y	14.824	13.39043333	7								1								1	0								14.824
16	185	6.25	16.23931624		m	m	1	p	0	n	n	n	n	n	n	y	n	n	n	n	4.182	6.730133333	8	1																	4.182
16	185	6.25	16.23931624		m	m	2	c	1	.	n	n	n	n	n	y	n	n	n	n	12.292	6.730133333	8		1																	12.292
16	185	6.25	16.23931624		m	m	3	l	2	.	y	n	n	n	n	n	n	n	n	n	32.026	6.730133333	8			1																	32.026
16	185	6.25	16.23931624		m	m	4	g	3	.	y	n	n	n	n	n	n	n	n	n	27.268	6.730133333	8				1																		27.268
16	185	6.25	16.23931624		m	m	5	b	4	.	n	y	y	n	y	n	n	n	n	n	28.299	6.730133333	8						1								1	1								28.299
16	185	6.25	16.23931624		m	m	6	k	5	.	n	n	n	n	n	n	n	n	n	n	10.948	6.730133333	8							1																	10.948
16	185	6.25	16.23931624		m	m	7	d	6	.	n	n	n	n	n	n	n	y	n	n	9.996	6.730133333	8								1								0	1								9.996
16	185	6.25	16.23931624		m	m	8	d	7	.	n	n	n	n	n	n	n	n	y	y	11.254	6.730133333	8								1								1	0								11.254
16	185	6.25	16.23931624		m	m	9	r		.	n	n	n	n	y	n	n	n	n	n	127.305	6.730133333	8										1
16	185	6.25	16.23931624		m	m	10	r		.	n	n	n	n	y	n	n	n	n	n	90.119	6.730133333	8										1
24	186	2	24.29322814	24	m	f	1	p	0	y	n	n	n	n	n	n	n	n	n	n	3.312	10.5704	7	1											1						3.312
24	186	2	24.29322814	24	m	f	2	c	1	.	n	n	n	n	n	n	n	n	n	n	4.186	10.5704	7		1																	4.186
24	186	2	24.29322814	24	m	f	3	g	2	.	y	n	n	n	n	n	n	n	n	n	13.056	10.5704	7				1																		13.056
24	186	2	24.29322814	24	m	f	4	b	3	.	n	y	y	n	y	n	n	n	n	n	18.088	10.5704	7						1								1	1								18.088
24	186	2	24.29322814	24	m	f	5	k	4	.	n	n	n	n	n	n	n	n	n	n	11.934	10.5704	7							1																	11.934
24	186	2	24.29322814	24	m	f	6	d	5	.	n	n	n	n	n	n	n	y	n	n	9.044	10.5704	7								1								0	1								9.044
24	186	2	24.29322814	24	m	f	7	d	6	.	n	n	n	n	y	n	n	n	y	y	1.904	10.5704	7								1								1	0								1.904
24	186	2	24.29322814	24	m	f	8	r		.	n	n	n	n	y	n	n	n	n	n	355.64	10.5704	7										1
8	187	10.25	8.185404339	32	m	f	1	p	0	y	n	n	n	n	n	n	n	n	n	n	3.466	13.48621667	7	1											1						3.466
8	187	10.25	8.185404339	32	m	f	2	c	1	.	n	n	n	n	n	n	n	n	n	n	5.304	13.48621667	7		1																	5.304
8	187	10.25	8.185404339	32	m	f	3	g	2	.	y	n	n	n	n	n	n	n	n	n	14.518	13.48621667	7				1																		14.518
8	187	10.25	8.185404339	32	m	f	4	b	3	.	n	y	n	n	n	n	n	n	n	n	18.917	13.48621667	7						1								0									18.917
8	187	10.25	8.185404339	32	m	f	5	k	4	.	n	n	n	n	n	n	n	n	n	n	17.81	13.48621667	7							1																	17.81
8	187	10.25	8.185404339	32	m	f	6	d	5	.	n	n	n	n	n	n	n	y	n	n	2.108	13.48621667	7								1								0	1								2.108
8	187	10.25	8.185404339	32	m	f	7	m		.	n	n	n	y	n	n	n	n	n	n	262.668	13.48621667	7									1																	262.668
8	187	10.25	8.185404339	32	m	f	8	r		.	n	n	n	n	y	n	n	n	n	n	267.002	13.48621667	7										1
8	187	10.25	8.185404339	32	m	f	9	r		.	n	n	n	n	y	n	n	n	n	n	9.28	13.48621667	7										1
8	187	10.25	8.185404339	32	m	f	10	r		.	n	n	n	n	y	n	n	n	n	n	6.222	13.48621667	7										1
8	187	10.25	8.185404339	32	m	f	11	d	6	.	n	n	n	n	n	n	n	n	y	y	3.944	13.48621667	7								1								1	0								3.944
16	188	8	16.1078238	27	m	m	1	p	0	n	n	n	n	n	n	n	n	n	n	n	4.621	4.0571	7	1																	4.621
16	188	8	16.1078238	27	m	m	2	c	1	.	n	n	n	n	n	y	n	n	n	n	11.798	4.0571	7		1																	11.798
16	188	8	16.1078238	27	m	m	3	g	2	.	y	n	n	n	n	y	y	n	n	n	31.348	4.0571	7				1																		31.348
16	188	8	16.1078238	27	m	m	4	b	3	.	n	y	n	n	n	y	n	n	n	n	18.464	4.0571	7						1								0									18.464
16	188	8	16.1078238	27	m	m	5	k	4	.	n	n	n	n	n	n	n	n	n	n	11.288	4.0571	7							1																	11.288
16	188	8	16.1078238	27	m	m	6	d	5	.	n	n	n	n	n	y	n	y	n	n	10.03	4.0571	7								1								0	1								10.03
16	188	8	16.1078238	27	m	m	7	m		.	n	n	n	y	n	n	n	n	n	n	2.721	4.0571	7									1																	2.721
16	188	8	16.1078238	27	m	m	8	d	6	.	n	n	n	y	n	n	n	n	y	n	7.174	4.0571	7								1								0	0								7.174
16	188	8	16.1078238	27	m	m	9	m		.	n	n	n	y	n	n	n	n	n	n	65.484	4.0571	7									1																	65.484
20	189	2.583333333	20.1183432	22	m	f	1	p	0	n	n	n	n	n	n	n	n	n	n	n	3.132	4.882666667	6	1																	3.132
20	189	2.583333333	20.1183432	22	m	f	2	c	1	.	n	n	n	n	n	n	n	n	n	n	3.434	4.882666667	6		1																	3.434
20	189	2.583333333	20.1183432	22	m	f	3	g	2	.	y	n	n	n	n	n	n	n	n	n	12.445	4.882666667	6				1																		12.445
20	189	2.583333333	20.1183432	22	m	f	4	b	3	.	n	y	y	n	n	n	n	n	n	n	31.552	4.882666667	6						1								1	1								31.552
20	189	2.583333333	20.1183432	22	m	f	5	k	4	.	n	n	n	n	n	n	n	n	n	n	6.359	4.882666667	6							1																	6.359
20	189	2.583333333	20.1183432	22	m	f	6	d	5	.	n	n	n	n	n	n	n	y	n	n	2.108	4.882666667	6								1								0	1								2.108
20	189	2.583333333	20.1183432	22	m	f	7	r		.	n	n	n	n	y	n	n	n	n	n	184.825	4.882666667	6										1
8	191	17	7.166337936	34	m	m	1	p	0	n	n	n	n	n	n	n	n	n	n	n	3.061	7.7678	7	1																	3.061
8	191	17	7.166337936	34	m	m	2	c	1	.	n	n	n	n	n	n	n	n	n	n	3.366	7.7678	7		1																	3.366
8	191	17	7.166337936	34	m	m	3	g	2	.	y	n	n	n	n	n	n	n	n	n	34.068	7.7678	7				1																		34.068
8	191	17	7.166337936	34	m	m	4	b	3	.	n	y	y	n	y	n	n	n	n	n	38.386	7.7678	7						1								1	1								38.386
8	191	17	7.166337936	34	m	m	5	r		.	n	n	n	n	y	n	n	n	n	n	2.822	7.7678	7										1
8	191	17	7.166337936	34	m	m	6	k	4	.	n	n	n	n	n	n	n	n	n	n	25.534	7.7678	7							1																	25.534
8	191	17	7.166337936	34	m	m	7	d	5	.	n	n	n	n	n	n	n	n	y	y	3.622	7.7678	7								1								1	0								3.622
8	191	17	7.166337936	34	m	m	8	d	6	.	n	n	n	n	n	n	n	y	n	n	4.084	7.7678	7								1								0	1								4.084
8	191	17	7.166337936	34	m	m	9	r		.	n	n	n	n	y	n	n	n	n	n	5.044	7.7678	7										1
8	191	17	7.166337936	34	m	m	10	m		.	n	n	n	y	n	n	n	n	n	n	278.869	7.7678	7									1																	278.869
8	192	4	7.790927022	23	m	m	1	p	0	n	n	n	n	n	n	n	n	n	n	n	5.247	13.15205	6	1																	5.247
8	192	4	7.790927022	23	m	m	2	c	1	.	n	n	n	n	n	n	n	n	n	n	4.556	13.15205	6		1																	4.556
8	192	4	7.790927022	23	m	m	3	g	2	.	y	n	n	n	n	n	n	n	n	n	15.504	13.15205	6				1																		15.504
8	192	4	7.790927022	23	m	m	4	b	3	.	n	y	y	n	n	n	n	n	n	n	21.216	13.15205	6						1								1	1								21.216
8	192	4	7.790927022	23	m	m	5	d	4	.	n	n	n	n	n	n	n	y	n	n	2.142	13.15205	6								1								0	1								2.142
8	192	4	7.790927022	23	m	m	6	r		.	n	n	n	n	y	n	n	n	n	n	18.303	13.15205	6										1
8	192	4	7.790927022	23	m	m	7	d	5	.	n	n	n	n	n	n	n	n	y	y	2.414	13.15205	6								1								1	0								2.414
8	192	4	7.790927022	23	m	m	8	m		.	n	n	n	y	n	n	n	n	n	n	147.084	13.15205	6									1																	147.084
8	192	4	7.790927022	23	m	m	9	r		.	n	n	n	n	y	n	n	n	n	n	10.438	13.15205	6										1
8	192	4	7.790927022	23	m	m	10	m		.	n	n	n	y	n	y	n	n	n	n	44.274	13.15205	6									1																	44.274
8	192	4	7.790927022	23	m	m	11	r		.	n	n	n	n	y	y	n	n	n	n	113.288	13.15205	6										1
8	192	4	7.790927022	23	m	m	12	r		.	n	n	n	n	y	y	n	n	y	y	269.756	13.15205	6										1
20	193	12	19.16502301		g	m	1	p	0	y	n	n	n	n	n	n	n	n	n	n	3.377	17.14295	8	1											1						3.377
20	193	12	19.16502301		g	m	2	c	1	.	n	n	n	n	n	n	n	n	n	n	4.352	17.14295	8		1																	4.352
20	193	12	19.16502301		g	m	3	g	2	.	y	n	n	n	n	n	n	n	n	n	19.415	17.14295	8				1																		19.415
20	193	12	19.16502301		g	m	4	b	3	.	n	y	n	n	n	n	n	n	n	n	24.106	17.14295	8						1								0									24.106
20	193	12	19.16502301		g	m	5	d	4	.	n	n	n	n	n	n	n	y	n	n	7.821	17.14295	8								1								0	1								7.821
20	193	12	19.16502301		g	m	6	d	5	.	n	n	n	n	n	n	n	n	y	n	17.954	17.14295	8								1								0	0								17.954
20	193	12	19.16502301		g	m	7	r		.	n	n	n	n	y	n	n	n	n	n	33.456	17.14295	8										1
20	193	12	19.16502301		g	m	8	d	6	.	n	n	n	n	n	n	n	n	y	n	7.584	17.14295	8								1								0	0								7.584
20	193	12	19.16502301		g	m	9	r		.	n	n	n	n	y	n	n	n	n	n	425.306	17.14295	8										1
20	193	12	19.16502301		g	m	10	d	7	.	n	n	n	n	n	n	n	n	y	y	6.733	17.14295	8								1								1	0								6.733
16	194	13.5	16.00920447	28	m	f	1	p	0	n	n	n	n	n	n	n	n	n	n	n	2.719	5.23595	7	1																	2.719
16	194	13.5	16.00920447	28	m	f	2	c	1	.	n	n	n	n	n	n	n	n	n	n	8.84	5.23595	7		1																	8.84
16	194	13.5	16.00920447	28	m	f	3	l	2	.	y	n	n	n	n	n	n	n	n	n	15.3	5.23595	7			1																	15.3
16	194	13.5	16.00920447	28	m	f	4	g	3	.	y	n	n	n	n	n	n	n	n	n	29.172	5.23595	7				1																		29.172
16	194	13.5	16.00920447	28	m	f	5	k	4	.	n	n	n	n	n	n	n	n	n	n	7.48	5.23595	7							1																	7.48
16	194	13.5	16.00920447	28	m	f	6	b	5	.	n	y	n	n	n	n	n	n	n	n	31.994	5.23595	7						1								0									31.994
16	194	13.5	16.00920447	28	m	f	7	d	6	.	n	n	n	n	n	n	n	y	n	n	8.058	5.23595	7								1								0	1								8.058
8	197	15	8.0539119	27	m	f	1	p	0	n	n	n	n	n	n	n	n	n	n	n	2.257	11.632	6	1																	2.257
8	197	15	8.0539119	27	m	f	2	c	1	.	n	n	n	n	n	n	n	n	n	n	8.303	11.632	6		1																	8.303
8	197	15	8.0539119	27	m	f	3	g	2	.	y	n	n	n	n	n	n	n	n	n	27.268	11.632	6				1																		27.268
8	197	15	8.0539119	27	m	f	4	b	3	.	n	y	y	n	y	y	n	n	n	n	35.292	11.632	6						1								1	1								35.292
8	197	15	8.0539119	27	m	f	5	d	4	.	n	n	n	n	n	n	n	y	n	n	16.32	11.632	6								1								0	1								16.32
8	197	15	8.0539119	27	m	f	6	m		.	n	n	n	y	n	n	n	n	y	y	351.526	11.632	6									1																	351.526
8	197	15	8.0539119	27	m	f	7	r		.	n	n	n	n	y	n	n	n	n	n	36.618	11.632	6										1
8	197	15	8.0539119	27	m	f	8	d	5	.	n	n	n	n	y	n	n	n	y	n	4.349	11.632	6								1								0	0								4.349
8	197	15	8.0539119	27	m	f	9	r		.	n	n	n	n	y	n	n	n	n	n	134.028	11.632	6										1
20	198	9.75	20.38132807	27	m	f	1	p	0	n	n	n	n	n	n	n	n	n	n	n	3.808	11.30255	6	1																	3.808
20	198	9.75	20.38132807	27	m	f	2	c	1	.	n	n	n	y	n	n	n	n	n	n	4.488	11.30255	6		1																	4.488
20	198	9.75	20.38132807	27	m	f	3	g	2	.	y	n	n	y	n	n	n	n	n	n	24.783	11.30255	6				1																		24.783
20	198	9.75	20.38132807	27	m	f	4	t		.	n	n	n	y	n	n	n	n	n	n	16.203	11.30255	6											1
20	198	9.75	20.38132807	27	m	f	5	b	3	.	n	y	n	y	n	n	n	n	n	n	30.954	11.30255	6						1								0									30.954
20	198	9.75	20.38132807	27	m	f	6	d	4	.	n	n	n	n	n	n	n	y	n	n	3.235	11.30255	6								1								0	1								3.235
20	198	9.75	20.38132807	27	m	f	7	r		.	n	n	n	n	y	n	n	n	n	n	21.22	11.30255	6										1
20	198	9.75	20.38132807	27	m	f	8	d	5	.	n	n	n	n	y	n	n	n	y	y	8.78	11.30255	6								1								1	0								8.78
20	198	9.75	20.38132807	27	m	f	9	r		.	n	n	n	n	y	n	n	n	n	n	59.104	11.30255	6										1
8	200	13.66666667	7.922419461	29	m	f	1	p	0	n	n	n	n	n	n	n	n	n	n	n	3.652	12.02615	7	1																	3.652
8	200	13.66666667	7.922419461	29	m	f	2	c	1	.	n	n	n	n	n	n	n	n	n	n	3.638	12.02615	7		1																	3.638
8	200	13.66666667	7.922419461	29	m	f	3	l	2	.	y	n	n	n	n	n	n	n	n	n	3.468	12.02615	7			1																	3.468
8	200	13.66666667	7.922419461	29	m	f	4	g	3	.	y	n	n	n	n	n	n	n	n	n	15.436	12.02615	7				1																		15.436
8	200	13.66666667	7.922419461	29	m	f	5	b	4	.	n	y	y	n	n	n	n	n	n	n	17.068	12.02615	7						1								1	1								17.068
8	200	13.66666667	7.922419461	29	m	f	6	d	5	.	n	n	n	n	n	n	n	y	n	n	8.33	12.02615	7								1								0	1								8.33
8	200	13.66666667	7.922419461	29	m	f	7	k	6	.	n	n	n	n	n	n	n	n	n	n	7.072	12.02615	7							1																	7.072
8	200	13.66666667	7.922419461	29	m	f	8	m		.	n	n	n	y	y	n	n	n	n	n	201.096	12.02615	7									1																	201.096
8	200	13.66666667	7.922419461	29	m	f	9	r		.	n	n	n	n	y	y	n	n	n	n	9.248	12.02615	7										1
8	200	13.66666667	7.922419461	29	m	f	10	m		.	n	n	n	y	n	n	n	n	y	n	152.087	12.02615	7									1																	152.087
8	200	13.66666667	7.922419461	29	m	f	11	r		.	n	n	n	n	y	n	n	n	n	n	27.37	12.02615	7										1
8	200	13.66666667	7.922419461	29	m	f	12	r		.	n	n	n	n	y	n	n	n	n	n	202.05	12.02615	7										1
24	201	14.5	23.63576594	31	m	f	1	p	0	n	n	n	n	n	n	n	n	n	n	n	4.564	6.4897	8	1																	4.564
24	201	14.5	23.63576594	31	m	f	2	c	1	.	n	n	n	n	n	n	n	n	n	n	7.326	6.4897	8		1																	7.326
24	201	14.5	23.63576594	31	m	f	3	l	2	.	y	n	n	n	n	n	n	n	n	n	9.176	6.4897	8			1																	9.176
24	201	14.5	23.63576594	31	m	f	4	g	3	.	y	n	n	n	n	n	n	n	n	n	24.882	6.4897	8				1																		24.882
24	201	14.5	23.63576594	31	m	f	5	b	4	.	n	y	n	n	n	n	n	n	n	n	32.869	6.4897	8						1								0									32.869
24	201	14.5	23.63576594	31	m	f	6	k	5	.	n	n	n	n	n	n	n	n	n	n	23.266	6.4897	8							1																	23.266
24	201	14.5	23.63576594	31	m	f	7	d	6	.	n	n	n	n	n	n	n	y	n	n	3.467	6.4897	8								1								0	1								3.467
24	201	14.5	23.63576594	31	m	f	8	r		.	n	n	n	n	y	n	n	n	n	n	16.929	6.4897	8										1
24	201	14.5	23.63576594	31	m	f	9	m		.	n	n	n	y	n	n	n	n	n	n	162.063	6.4897	8									1																	162.063
24	201	14.5	23.63576594	31	m	f	10	r		.	n	n	n	n	y	n	n	n	n	n	37.292	6.4897	8										1
24	201	14.5	23.63576594	31	m	f	11	d	7	.	n	n	n	n	n	n	n	n	y	n	3.565	6.4897	8								1								0	0								3.565
4	202	12.83333333	4.207758054	24	m	m	1	p	0	n	n	n	n	n	n	n	n	n	n	n	4.986	12.8582	7	1																	4.986
4	202	12.83333333	4.207758054	24	m	m	2	c	1	.	n	n	n	n	n	n	n	n	n	n	3.069	12.8582	7		1																	3.069
4	202	12.83333333	4.207758054	24	m	m	3	g	2	.	y	n	n	n	n	n	n	n	n	n	22.671	12.8582	7				1																		22.671
4	202	12.83333333	4.207758054	24	m	m	4	b	3	.	n	y	y	n	n	n	n	n	n	n	22.143	12.8582	7						1								1	1								22.143
4	202	12.83333333	4.207758054	24	m	m	5	k	4	.	n	n	n	n	n	n	n	n	n	n	23.529	12.8582	7							1																	23.529
4	202	12.83333333	4.207758054	24	m	m	6	d	5	.	n	n	n	n	n	n	n	y	n	n	2.576	12.8582	7								1								0	1								2.576
4	202	12.83333333	4.207758054	24	m	m	7	d	6	.	n	n	n	n	n	n	n	n	y	n	6.205	12.8582	7								1								0	0								6.205
4	202	12.83333333	4.207758054	24	m	m	8	r		.	n	n	n	n	y	n	n	n	n	n	152.592	12.8582	7										1
4	202	12.83333333	4.207758054	24	m	m	9	m		.	n	n	n	y	n	n	n	n	y	y	399.003	12.8582	7									1																	399.003
4	202	12.83333333	4.207758054	24	m	m	10	r		.	n	n	n	n	y	n	n	n	n	n	27.738	12.8582	7										1
8	203	17	7.823800131	25	m	m	1	p	0	n	n	n	n	n	n	n	n	n	n	n	5.134	7.913766667	6	1																	5.134
8	203	17	7.823800131	25	m	m	2	c	1	.	n	n	n	n	n	n	n	n	n	n	6.664	7.913766667	6		1																	6.664
8	203	17	7.823800131	25	m	m	3	g	2	.	y	n	n	n	n	n	n	n	n	n	23.052	7.913766667	6				1																		23.052
8	203	17	7.823800131	25	m	m	4	b	3	.	n	y	y	n	n	n	n	n	n	n	27.029	7.913766667	6						1								1	1								27.029
8	203	17	7.823800131	25	m	m	5	k	4	.	n	n	n	n	n	n	n	n	n	n	19.21	7.913766667	6							1																	19.21
8	203	17	7.823800131	25	m	m	6	d	5	.	n	n	n	n	n	n	n	y	n	n	5.134	7.913766667	6								1								0	1								5.134
0	204	23	0.690335306	25	m	m	1	p	0	n	n	n	n	n	n	n	n	n	n	n	2.941	36.20425	9	1																	2.941
0	204	23	0.690335306	25	m	m	2	c	1	.	n	n	n	n	n	n	n	n	n	n	7.548	36.20425	9		1																	7.548
0	204	23	0.690335306	25	m	m	3	l	2	.	y	n	n	n	n	n	n	n	n	n	7.99	36.20425	9			1																	7.99
0	204	23	0.690335306	25	m	m	4	g	3	.	y	n	n	n	n	n	n	n	n	n	17.272	36.20425	9				1																		17.272
0	204	23	0.690335306	25	m	m	5	a	4	.	n	y	y	n	n	n	n	n	n	n	18.258	36.20425	9					1								1		1						18.258
0	204	23	0.690335306	25	m	m	6	b	5	.	n	y	y	n	n	n	n	n	n	n	10.506	36.20425	9						1								1	1								10.506
0	204	23	0.690335306	25	m	m	7	k	6	.	n	n	n	n	n	n	n	n	n	n	8.228	36.20425	9							1																	8.228
0	204	23	0.690335306	25	m	m	8	d	7	.	n	n	n	n	n	n	n	y	n	n	2.074	36.20425	9								1								0	1								2.074
0	204	23	0.690335306	25	m	m	9	d	8	.	n	n	n	n	n	n	n	y	n	n	2.516	36.20425	9								1								0	1								2.516
0	204	23	0.690335306	25	m	m	10	r		.	n	n	n	n	y	n	n	n	n	n	203.524	36.20425	9										1
0	204	23	0.690335306	25	m	m	11	r		.	n	n	n	n	y	n	n	n	n	n	11.356	36.20425	9										1
0	204	23	0.690335306	25	m	m	12	r		.	n	n	n	n	y	y	n	n	n	n	301.562	36.20425	9										1
0	204	23	0.690335306	25	m	m	13	r		.	n	n	n	n	y	n	n	n	n	n	191.102	36.20425	9										1
4	205	16.16666667	3.681788297	20	m	m	1	p	0	n	n	n	n	n	n	n	n	n	n	n	3.442	3.19165	8	1																	3.442
4	205	16.16666667	3.681788297	20	m	m	2	c	1	.	n	n	n	n	n	n	n	n	n	n	7.684	3.19165	8		1																	7.684
4	205	16.16666667	3.681788297	20	m	m	3	l	2	.	y	n	n	n	n	n	n	n	n	n	8.84	3.19165	8			1																	8.84
4	205	16.16666667	3.681788297	20	m	m	4	g	3	.	y	n	n	n	n	n	n	n	n	n	17	3.19165	8				1																		17
4	205	16.16666667	3.681788297	20	m	m	5	b	4	.	n	y	y	n	y	n	n	n	n	n	25.296	3.19165	8						1								1	1								25.296
4	205	16.16666667	3.681788297	20	m	m	6	r		.	n	n	n	n	y	n	n	n	n	n	3.434	3.19165	8										1
4	205	16.16666667	3.681788297	20	m	m	7	k	5	.	n	n	n	n	y	n	n	n	n	n	7.378	3.19165	8							1																	7.378
4	205	16.16666667	3.681788297	20	m	m	8	d	6	.	n	n	n	n	y	n	n	y	n	n	1.904	3.19165	8								1								0	1								1.904
4	205	16.16666667	3.681788297	20	m	m	9	r		.	n	n	n	n	y	n	n	n	n	n	42.874	3.19165	8										1
4	205	16.16666667	3.681788297	20	m	m	10	d	7	.	n	n	n	n	y	n	n	n	y	n	2.788	3.19165	8								1								0	0								2.788
4	205	16.16666667	3.681788297	20	m	m	11	r		.	n	n	n	n	y	n	n	n	n	n	32.776	3.19165	8										1
0	206		0.525969757	21	g	m	1	p	0	n	n	n	n	n	n	n	n	n	n	n	3.134	18.99903333	8	1																	3.134
0	206		0.525969757	21	g	m	2	c	1	.	n	n	n	n	n	n	n	n	n	n	4.42	18.99903333	8		1																	4.42
0	206		0.525969757	21	g	m	3	l	2	.	y	n	n	n	n	n	n	n	n	n	9.248	18.99903333	8			1																	9.248
0	206		0.525969757	21	g	m	4	g	3	.	y	n	n	n	n	n	n	n	n	n	18.394	18.99903333	8				1																		18.394
0	206		0.525969757	21	g	m	5	a	4	.	n	y	y	n	n	n	n	n	n	n	18.7	18.99903333	8					1								1		1						18.7
0	206		0.525969757	21	g	m	6	b	5	.	n	y	y	n	n	n	n	n	n	n	19.788	18.99903333	8						1								1	1								19.788
0	206		0.525969757	21	g	m	7	d	6	.	n	n	n	n	n	n	n	y	y	y	6.324	18.99903333	8								1								1	1								6.324
0	206		0.525969757	21	g	m	8	r		.	n	n	n	n	y	n	n	n	n	n	178.228	18.99903333	8										1
0	206		0.525969757	21	g	m	9	r		.	n	n	n	n	y	n	n	n	n	n	178.806	18.99903333	8										1
0	206		0.525969757	21	g	m	10	d	7	.	n	n	n	n	n	n	n	n	y	y	4.352	18.99903333	8								1								1	0								4.352
0	206		0.525969757	21	g	m	11	m		.	n	n	n	y	n	n	n	n	n	n	238.408	18.99903333	8									1																	238.408
8	207	21	7.922419461	20	m	f	1	p	0	n	n	n	n	n	n	n	n	n	n	n	3.562	2.168033333	8	1																	3.562
8	207	21	7.922419461	20	m	f	2	c	1	.	n	n	n	n	n	n	n	n	n	n	4.114	2.168033333	8		1																	4.114
8	207	21	7.922419461	20	m	f	3	l	2	.	y	n	n	n	n	n	n	n	n	n	9.86	2.168033333	8			1																	9.86
8	207	21	7.922419461	20	m	f	4	g	3	.	y	n	n	n	n	n	n	n	n	n	16.626	2.168033333	8				1																		16.626
8	207	21	7.922419461	20	m	f	5	b	4	.	n	y	y	n	n	n	n	n	n	n	30.498	2.168033333	8						1								1	1								30.498
8	207	21	7.922419461	20	m	f	6	k	5	.	n	n	n	n	n	n	n	n	n	n	14.552	2.168033333	8							1																	14.552
8	207	21	7.922419461	20	m	f	7	d	6	.	n	n	n	n	n	n	n	y	n	n	8.534	2.168033333	8								1								0	1								8.534
8	207	21	7.922419461	20	m	f	8	d	7	.	n	n	n	n	n	n	n	n	y	y	7.276	2.168033333	8								1								1	0								7.276
0	208		0.295857988	34	g	m	1	p	0	n	n	n	n	n	n	y	n	n	n	n	3.413	5.6207	10	1																	3.413
0	208		0.295857988	34	g	m	2	c	1	.	n	n	n	n	n	y	n	n	n	n	14.314	5.6207	10		1																	14.314
0	208		0.295857988	34	g	m	3	l	2	.	y	n	n	n	n	y	n	n	n	n	12.988	5.6207	10			1																	12.988
0	208		0.295857988	34	g	m	4	g	3	.	y	n	n	n	n	n	n	n	n	n	18.428	5.6207	10				1																		18.428
0	208		0.295857988	34	g	m	5	a	4	.	n	n	y	n	n	y	n	n	n	n	9.996	5.6207	10					1								1		1						9.996
0	208		0.295857988	34	g	m	6	a	5	.	n	y	y	n	n	y	n	n	n	n	12.24	5.6207	10					1								1		1						12.24
0	208		0.295857988	34	g	m	7	b	6	.	n	y	y	n	n	y	n	n	n	n	16.797	5.6207	10						1								1	1								16.797
0	208		0.295857988	34	g	m	8	k	7	.	n	n	n	n	n	y	n	n	n	n	12.716	5.6207	10							1																	12.716
0	208		0.295857988	34	g	m	9	r		.	n	n	n	n	y	y	n	n	n	n	4.046	5.6207	10										1
0	208		0.295857988	34	g	m	10	r		.	n	n	n	n	y	n	n	n	n	n	4.386	5.6207	10										1
0	208		0.295857988	34	g	m	11	d	8	.	n	n	n	n	n	n	n	y	n	n	15.267	5.6207	10								1								0	1								15.267
0	208		0.295857988	34	g	m	12	r		.	n	n	n	n	y	n	n	n	n	n	18.735	5.6207	10										1
0	208		0.295857988	34	g	m	13	d	9	.	n	n	n	n	y	n	n	y	n	n	1.53	5.6207	10								1								0	1								1.53
0	208		0.295857988	34	g	m	14	r		.	n	n	n	n	y	n	n	n	n	n	137.071	5.6207	10										1
8	209	13	8.218277449	28	m	f	1	p	0	n	n	n	n	n	n	n	n	n	n	n	4.368	5.782733333	6	1																	4.368
8	209	13	8.218277449	28	m	f	2	c	1	.	n	n	n	n	n	n	n	n	n	n	3.978	5.782733333	6		1																	3.978
8	209	13	8.218277449	28	m	f	3	g	2	.	y	n	n	n	n	n	n	n	n	n	26.894	5.782733333	6				1																		26.894
8	209	13	8.218277449	28	m	f	4	b	3	.	n	y	y	n	n	n	n	n	n	n	34.306	5.782733333	6						1								1	1								34.306
8	209	13	8.218277449	28	m	f	5	k	4	.	n	n	n	n	n	n	n	n	n	n	11.764	5.782733333	6							1																	11.764
8	209	13	8.218277449	28	m	f	6	d	5	.	n	n	n	n	n	n	n	y	n	n	4.556	5.782733333	6								1								0	1								4.556
8	209	13	8.218277449	28	m	f	7	r		.	n	n	n	n	y	n	n	n	n	n	42.405	5.782733333	6										1
24	210		24.09598948	31	m	f	1	p	0	y	n	n	n	n	n	n	n	n	n	n	3.93	10.70318333	7	1											1						3.93
24	210		24.09598948	31	m	f	2	c	1	.	n	n	n	n	n	n	n	n	n	n	4.182	10.70318333	7		1																	4.182
24	210		24.09598948	31	m	f	3	g	2	.	y	n	n	n	n	n	n	n	n	n	19.244	10.70318333	7				1																		19.244
24	210		24.09598948	31	m	f	4	b	3	.	n	y	n	n	n	n	n	n	n	n	17.544	10.70318333	7						1								0									17.544
24	210		24.09598948	31	m	f	5	k	4	.	n	n	n	n	n	n	n	n	n	n	12.682	10.70318333	7							1																	12.682
24	210		24.09598948	31	m	f	6	d	5	.	n	n	n	n	n	n	n	y	n	n	8.772	10.70318333	7								1								0	1								8.772
24	210		24.09598948	31	m	f	7	r		.	n	n	n	n	y	n	n	n	n	n	66.504	10.70318333	7										1
24	210		24.09598948	31	m	f	8	d	6	.	n	n	n	n	y	n	n	n	y	y	4.828	10.70318333	7								1								1	0								4.828
24	210		24.09598948	31	m	f	9	r		.	n	n	n	n	y	n	n	n	n	n	357.647	10.70318333	7										1
24	210		24.09598948	31	m	f	10	r		.	n	n	n	n	y	n	n	n	n	n	38.046	10.70318333	7										1
24	210		24.09598948	31	m	f	11	r		.	n	n	n	n	y	n	n	n	n	n	7.431	10.70318333	7										1
24	211	3	24.29322814	21	m	f	1	p	0	y	n	n	n	n	n	n	n	n	n	n	3.557	1.628466667	7	1											1						3.557
24	211	3	24.29322814	21	m	f	2	c	1	.	n	n	n	n	n	n	n	n	n	n	5.814	1.628466667	7		1																	5.814
24	211	3	24.29322814	21	m	f	3	g	2	.	y	n	n	n	n	n	n	n	n	n	10.133	1.628466667	7				1																		10.133
24	211	3	24.29322814	21	m	f	4	b	3	.	n	y	y	n	n	n	n	n	n	n	10.608	1.628466667	7						1								1	1								10.608
24	211	3	24.29322814	21	m	f	5	d	4	.	n	n	n	n	n	n	n	y	n	n	2.414	1.628466667	7								1								0	1								2.414
24	211	3	24.29322814	21	m	f	6	k	5	.	n	n	n	n	n	n	n	n	n	n	6.018	1.628466667	7							1																	6.018
24	211	3	24.29322814	21	m	f	7	d	6	.	n	n	n	n	n	n	n	y	n	n	1.837	1.628466667	7								1								0	1								1.837
0	212	21.5	0.854700855	28	m	f	1	p	0	n	n	n	n	n	n	n	n	n	n	n	5.763	23.36121667	11	1																	5.763
0	212	21.5	0.854700855	28	m	f	2	c	1	.	n	n	n	n	n	n	n	n	n	n	3.978	23.36121667	11		1																	3.978
0	212	21.5	0.854700855	28	m	f	3	l	2	.	y	n	n	n	n	n	n	n	n	n	17.408	23.36121667	11			1																	17.408
0	212	21.5	0.854700855	28	m	f	4	g	3	.	y	n	n	n	n	n	n	n	n	n	21.93	23.36121667	11				1																		21.93
0	212	21.5	0.854700855	28	m	f	5	a	4	.	n	y	y	n	n	n	n	n	n	n	19.346	23.36121667	11					1								1		1						19.346
0	212	21.5	0.854700855	28	m	f	6	a	5	.	n	y	y	n	n	n	n	n	n	n	17.341	23.36121667	11					1								1		1						17.341
0	212	21.5	0.854700855	28	m	f	7	b	6	.	n	y	y	n	n	n	n	n	n	n	24.412	23.36121667	11						1								1	1								24.412
0	212	21.5	0.854700855	28	m	f	8	d	7	.	n	n	n	n	n	n	n	y	n	n	3.502	23.36121667	11								1								0	1								3.502
0	212	21.5	0.854700855	28	m	f	9	d	8	.	n	n	n	n	n	n	n	y	n	n	1.836	23.36121667	11								1								0	1								1.836
0	212	21.5	0.854700855	28	m	f	10	d	9	.	n	n	n	n	n	n	n	n	y	n	4.046	23.36121667	11								1								0	0								4.046
0	212	21.5	0.854700855	28	m	f	11	d	10	.	n	n	n	n	n	n	n	n	y	y	4.59	23.36121667	11								1								1	0								4.59
0	212	21.5	0.854700855	28	m	f	12	r		.	n	n	n	n	y	n	n	n	n	n	173.018	23.36121667	11										1
0	212	21.5	0.854700855	28	m	f	13	r		.	n	n	n	n	y	n	n	n	n	n	211.761	23.36121667	11										1
0	212	21.5	0.854700855	28	m	f	14	m		.	n	n	n	y	n	n	n	n	n	n	331.086	23.36121667	11									1																	331.086
0	212	21.5	0.854700855	28	m	f	15	r		.	n	n	n	n	y	n	n	n	n	n	109.008	23.36121667	11										1
4	213	20.5	4.569362262	24	m	f	1	p	0	n	n	n	n	n	n	n	n	n	n	n	4.586	13.84716667	7	1																	4.586
4	213	20.5	4.569362262	24	m	f	2	c	1	.	n	n	n	n	n	n	n	n	n	n	8.126	13.84716667	7		1																	8.126
4	213	20.5	4.569362262	24	m	f	3	l	2	.	y	n	n	n	n	n	n	n	n	n	7.174	13.84716667	7			1																	7.174
4	213	20.5	4.569362262	24	m	f	4	g	3	.	y	n	n	n	n	n	n	n	n	n	22.236	13.84716667	7				1																		22.236
4	213	20.5	4.569362262	24	m	f	5	b	4	.	n	y	y	n	n	y	n	n	n	n	30.532	13.84716667	7						1								1	1								30.532
4	213	20.5	4.569362262	24	m	f	6	k	5	.	n	n	n	n	n	y	n	n	n	n	12.614	13.84716667	7							1																	12.614
4	213	20.5	4.569362262	24	m	f	7	d	6	.	n	n	n	n	n	y	n	y	n	n	13.158	13.84716667	7								1								0	1								13.158
4	213	20.5	4.569362262	24	m	f	8	r		.	n	n	n	n	y	y	n	n	n	n	6.834	13.84716667	7										1
4	213	20.5	4.569362262	24	m	f	9	r		.	n	n	n	n	y	n	n	n	n	n	688.797	13.84716667	7										1
0	214	19	1.413543721	32	m	f	1	p	0	n	n	n	n	n	n	n	n	n	n	n	3.726	4.053816667	9	1																	3.726
0	214	19	1.413543721	32	m	f	2	c	1	.	n	n	n	n	n	n	n	n	n	n	4.454	4.053816667	9		1																	4.454
0	214	19	1.413543721	32	m	f	3	l	2	.	y	n	n	n	n	n	n	n	n	n	4.625	4.053816667	9			1																	4.625
0	214	19	1.413543721	32	m	f	4	g	3	.	y	n	n	n	n	n	n	n	n	n	16.014	4.053816667	9				1																		16.014
0	214	19	1.413543721	32	m	f	5	a	4	.	n	y	y	n	n	n	n	n	n	n	18.7	4.053816667	9					1								1		1						18.7
0	214	19	1.413543721	32	m	f	6	b	5	.	n	y	y	n	n	y	n	n	n	n	12.784	4.053816667	9						1								1	1								12.784
0	214	19	1.413543721	32	m	f	7	r		.	n	n	n	n	y	n	n	n	n	n	11.458	4.053816667	9										1
0	214	19	1.413543721	32	m	f	8	k	6	.	n	n	n	n	n	n	n	n	n	n	14.143	4.053816667	9							1																	14.143
0	214	19	1.413543721	32	m	f	9	r		.	n	n	n	n	y	n	n	n	n	n	8.5	4.053816667	9										1
0	214	19	1.413543721	32	m	f	10	d	7	.	n	n	n	n	n	n	n	y	n	n	2.006	4.053816667	9								1								0	1								2.006
0	214	19	1.413543721	32	m	f	11	r		.	n	n	n	n	y	n	n	n	n	n	5.032	4.053816667	9										1
0	214	19	1.413543721	32	m	f	12	d	8	.	n	n	n	n	n	n	n	n	y	n	2.041	4.053816667	9								1								0	0								2.041
0	214	19	1.413543721	32	m	f	13	r		.	n	n	n	n	y	n	n	n	n	n	26.113	4.053816667	9										1
0	215	20	1.380670611		m	m	1	p	0	n	n	n	n	n	n	n	n	n	n	n	4.964	6.716333333	8	1																	4.964
0	215	20	1.380670611		m	m	2	c	1	.	n	n	n	n	n	n	n	n	n	n	5.372	6.716333333	8		1																	5.372
0	215	20	1.380670611		m	m	3	l	2	.	y	n	n	n	n	n	n	n	n	n	13.192	6.716333333	8			1																	13.192
0	215	20	1.380670611		m	m	4	g	3	.	y	n	n	n	n	n	n	n	n	n	32.878	6.716333333	8				1																		32.878
0	215	20	1.380670611		m	m	5	a	4	.	n	y	y	n	n	n	n	n	n	n	21.216	6.716333333	8					1								1		1						21.216
0	215	20	1.380670611		m	m	6	b	5	.	n	y	y	n	n	n	n	n	n	n	16.286	6.716333333	8						1								1	1								16.286
0	215	20	1.380670611		m	m	7	r		.	n	n	n	n	y	n	n	n	n	n	5.27	6.716333333	8										1
0	215	20	1.380670611		m	m	8	d	6	.	n	n	n	n	n	n	n	y	n	n	4.454	6.716333333	8								1								0	1								4.454
0	215	20	1.380670611		m	m	9	r		.	n	n	n	n	y	n	n	n	n	n	17.748	6.716333333	8										1
0	215	20	1.380670611		m	m	10	d	7	.	n	n	n	n	n	n	n	y	n	n	5.264	6.716333333	8								1								0	1								5.264
0	215	20	1.380670611		m	m	11	r		.	n	n	n	n	y	n	n	n	n	n	6.664	6.716333333	8										1
0	215	20	1.380670611		m	m	12	r		.	n	n	n	n	y	n	n	n	n	n	4.95	6.716333333	8										1
4	216	19	4.010519395	23	m	f	1	p	0	n	n	n	n	n	n	n	n	n	n	n	2.853	16.49231667	8	1																	2.853
4	216	19	4.010519395	23	m	f	2	c	1	.	n	n	n	n	n	n	n	n	n	n	2.72	16.49231667	8		1																	2.72
4	216	19	4.010519395	23	m	f	3	l	2	.	y	n	n	n	n	n	n	n	n	n	5.372	16.49231667	8			1																	5.372
4	216	19	4.010519395	23	m	f	4	g	3	.	y	n	n	n	n	n	n	n	n	n	17.408	16.49231667	8				1																		17.408
4	216	19	4.010519395	23	m	f	5	a	4	.	n	y	y	n	n	n	n	n	n	n	15.527	16.49231667	8					1								1		1						15.527
4	216	19	4.010519395	23	m	f	6	b	5	.	n	y	y	n	y	y	n	n	n	n	29.036	16.49231667	8						1								1	1								29.036
4	216	19	4.010519395	23	m	f	7	k	6	.	n	n	n	n	n	y	n	n	n	n	10.846	16.49231667	8							1																	10.846
4	216	19	4.010519395	23	m	f	8	d	7	.	n	n	n	n	n	n	n	y	n	n	5.552	16.49231667	8								1								0	1								5.552
4	216	19	4.010519395	23	m	f	9	r		.	n	n	n	n	y	y	n	n	n	n	8.464	16.49231667	8										1
4	216	19	4.010519395	23	m	f	10	m		.	n	n	n	y	n	n	n	n	y	y	271.388	16.49231667	8									1																	271.388
4	216	19	4.010519395	23	m	f	11	r		.	n	n	n	n	y	n	n	n	n	n	47.906	16.49231667	8										1
4	217	20.91666667	4.240631164	30	m	m	1	p	0	n	n	n	n	n	n	n	n	n	n	n	3.06	9.202333333	7	1																	3.06
4	217	20.91666667	4.240631164	30	m	m	2	c	1	.	n	n	n	n	n	n	n	n	n	n	4.98	9.202333333	7		1																	4.98
4	217	20.91666667	4.240631164	30	m	m	3	l	2	.	y	n	n	n	n	n	n	n	n	n	11.662	9.202333333	7			1																	11.662
4	217	20.91666667	4.240631164	30	m	m	4	g	3	.	y	n	n	n	n	n	n	n	n	n	33.592	9.202333333	7				1																		33.592
4	217	20.91666667	4.240631164	30	m	m	5	b	4	.	n	y	y	n	n	n	n	n	n	n	25.874	9.202333333	7						1								1	1								25.874
4	217	20.91666667	4.240631164	30	m	m	6	k	5	.	n	n	n	n	n	n	n	n	n	n	18.938	9.202333333	7							1																	18.938
4	217	20.91666667	4.240631164	30	m	m	7	d	6	.	n	n	n	n	n	n	n	y	n	n	8.333	9.202333333	7								1								0	1								8.333
4	217	20.91666667	4.240631164	30	m	m	8	r		.	n	n	n	n	y	n	n	n	n	n	47	9.202333333	7										1
0	218	20	0.821827745	20	m	m	1	p	0	n	n	n	n	n	n	y	n	n	n	n	6.036	5.505583333	10	1																	6.036
0	218	20	0.821827745	20	m	m	2	c	1	.	n	n	n	n	n	y	n	n	n	n	5.855	5.505583333	10		1																	5.855
0	218	20	0.821827745	20	m	m	3	l	2	.	y	n	n	n	n	y	n	n	n	n	8.738	5.505583333	10			1																	8.738
0	218	20	0.821827745	20	m	m	4	g	3	.	y	n	n	n	n	y	n	n	n	n	15.232	5.505583333	10				1																		15.232
0	218	20	0.821827745	20	m	m	5	a	4	.	n	y	y	n	n	y	n	n	n	n	13.702	5.505583333	10					1								1		1						13.702
0	218	20	0.821827745	20	m	m	6	b	5	.	n	y	y	n	y	y	n	n	n	n	18.122	5.505583333	10						1								1	1								18.122
0	218	20	0.821827745	20	m	m	7	r		.	n	n	n	n	y	n	n	n	n	n	11.83	5.505583333	10										1
0	218	20	0.821827745	20	m	m	8	k	6	.	n	n	n	n	y	y	n	n	n	n	5.018	5.505583333	10							1																	5.018
0	218	20	0.821827745	20	m	m	9	r		.	n	n	n	n	y	y	n	n	n	n	10.38	5.505583333	10										1
0	218	20	0.821827745	20	m	m	10	d	7	.	n	n	n	n	y	n	n	y	n	n	6.378	5.505583333	10								1								0	1								6.378
0	218	20	0.821827745	20	m	m	11	r		.	n	n	n	n	y	n	n	n	n	n	12.157	5.505583333	10										1
0	218	20	0.821827745	20	m	m	12	d	8	.	n	n	n	n	n	n	n	n	y	n	5.237	5.505583333	10								1								0	0								5.237
0	218	20	0.821827745	20	m	m	13	r		.	n	n	n	n	y	n	n	n	n	n	17.417	5.505583333	10										1
0	218	20	0.821827745	20	m	m	14	d	9	.	n	n	n	n	n	n	n	n	y	y	2.788	5.505583333	10								1								1	0								2.788
0	218	20	0.821827745	20	m	m	15	r		.	n	n	n	n	y	n	n	n	n	n	124.474	5.505583333	10										1
0	218	20	0.821827745	20	m	m	16	r		.	n	n	n	n	y	n	n	n	n	n	25.031	5.505583333	10										1
4	219	20	4.142011834	28	m	f	1	p	0	n	n	n	n	n	n	n	n	n	n	n	1.088	2.645316667	8	1																	1.088
4	219	20	4.142011834	28	m	f	2	c	1	.	n	n	n	n	n	n	n	n	n	n	5.202	2.645316667	8		1																	5.202
4	219	20	4.142011834	28	m	f	3	l	2	.	y	n	n	n	n	n	n	n	n	n	7.348	2.645316667	8			1																	7.348
4	219	20	4.142011834	28	m	f	4	g	3	.	y	n	n	n	n	n	n	n	n	n	17.272	2.645316667	8				1																		17.272
4	219	20	4.142011834	28	m	f	5	k	4	.	n	n	n	n	n	n	n	n	n	n	11.73	2.645316667	8							1																	11.73
4	219	20	4.142011834	28	m	f	6	b	5	.	n	y	y	n	n	n	n	n	n	n	20.57	2.645316667	8						1								1	1								20.57
4	219	20	4.142011834	28	m	f	7	k	6	.	n	n	n	n	n	n	n	n	n	n	16.83	2.645316667	8							1																	16.83
4	219	20	4.142011834	28	m	f	8	d	7	.	n	n	n	n	n	n	n	y	n	n	7.234	2.645316667	8								1								0	1								7.234
4	219	20	4.142011834	28	m	f	9	m		.	n	n	n	y	n	n	n	n	n	n	35.945	2.645316667	8									1																	35.945
[truncated: 2 more columns]
